# Supplementary material for: Understanding patient preference for physician attire: a cross-sectional observational study of 10 academic medical centres in the USA
Source: PubMed Central journal article supplement — BMJ Open. 2018 May 29;8(5):e021239. doi: 10.1136/bmjopen-2017-021239 (PMC5988098; doi:10.1136/bmjopen-2017-021239), 2018-05-29
Supplement: bmjopen-2017-021239.draft_revisions.pdf [file bmjopen-2017-021239.draft_revisions.pdf]

# BMJ Open

BMJ Open is committed to open peer review. As part of this commitment we make the peer review history of every article we publish publicly available.

When an article is published we post the peer reviewers' comments and the authors' responses online. We also post the versions of the paper that were used during peer review. These are the versions that the peer review comments apply to.

The versions of the paper that follow are the versions that were submitted during the peer review process. They are not the versions of record or the final published versions. They should not be cited or distributed as the published version of this manuscript.

BMJ Open is an open access journal and the full, final, typeset and author-corrected version of record of the manuscript is available on our site with no access controls, subscription charges or pay-per-view fees (<http://bmjopen.bmj.com>).

If you have any questions on BMJ Open's open peer review process please email [info.bmjopen@bmj.com](mailto:info.bmjopen@bmj.com)

# BMJ Open

## A NATIONAL CROSS-SECTIONAL STUDY EVALUATING PATIENT PREFERENCES FOR PHYSICIAN ATTIRE

|                               |                                                                                                                                                                                                                                                                                                                                                                                                                                                                                                                                                                                                                                                                           |
|-------------------------------|---------------------------------------------------------------------------------------------------------------------------------------------------------------------------------------------------------------------------------------------------------------------------------------------------------------------------------------------------------------------------------------------------------------------------------------------------------------------------------------------------------------------------------------------------------------------------------------------------------------------------------------------------------------------------|
| Journal:                      | <i>BMJ Open</i>                                                                                                                                                                                                                                                                                                                                                                                                                                                                                                                                                                                                                                                           |
| Manuscript ID                 | bmjopen-2017-021239                                                                                                                                                                                                                                                                                                                                                                                                                                                                                                                                                                                                                                                       |
| Article Type:                 | Research                                                                                                                                                                                                                                                                                                                                                                                                                                                                                                                                                                                                                                                                  |
| Date Submitted by the Author: | 20-Dec-2017                                                                                                                                                                                                                                                                                                                                                                                                                                                                                                                                                                                                                                                               |
| Complete List of Authors:     | Petrilli, Christopher; University of Michigan, Internal Medicine<br>Saint, Sanjay; Veterans Affairs Ann Arbor Healthcare System, Internal<br>Medicine; University of Michigan, Internal Medicine<br>Jennings, Joseph; Georgetown University School of Medicine, Internal<br>Medicine<br>Caruso, Andrew; Baylor College of Medicine, Internal Medicine<br>Kuhn, Latoya; University of Michigan, Internal Medicine; Veterans Affairs<br>Ann Arbor Healthcare System, Internal Medicine<br>Snyder, Ashley; University of Michigan, Internal Medicine<br>Chopra, Vineet; University of Michigan, Medicine; Veterans Affairs Ann<br>Arbor Healthcare System, Internal Medicine |
| Keywords:                     | Health policy < HEALTH SERVICES ADMINISTRATION & MANAGEMENT,<br>Protocols & guidelines < HEALTH SERVICES ADMINISTRATION &<br>MANAGEMENT, Quality in health care < HEALTH SERVICES<br>ADMINISTRATION & MANAGEMENT, Infection control < INFECTIOUS<br>DISEASES, PUBLIC HEALTH, QUALITATIVE RESEARCH                                                                                                                                                                                                                                                                                                                                                                         |
|                               |                                                                                                                                                                                                                                                                                                                                                                                                                                                                                                                                                                                                                                                                           |

SCHOLARONE™  
Manuscripts

**A NATIONAL CROSS-SECTIONAL STUDY EVALUATING  
PATIENT PREFERENCES FOR PHYSICIAN ATTIRE**

Christopher M. Petrilli, MD (1, 2)

Sanjay Saint, MD, MPH (2, 1)

Joseph J. Jennings, MD (3)

Andrew Caruso, MD (4)

Latoya Kuhn, MPH (2, 1)

Ashley Snyder, MPH (1)

Vineet Chopra, MD, MSc (1, 2)

**From:** (1) Division of Hospital Medicine, Department of Medicine, University of Michigan Medical School; (2) VA Ann Arbor Healthcare System both in Ann Arbor, MI. (3) Division of Gastroenterology, Department of Medicine, Georgetown University School of Medicine, Washington, DC (4) Division of General Internal Medicine, Department of Medicine, Baylor College of Medicine, Houston, TX

**Manuscript Word Count:** 3180, excluding abstract, references, tables and figures

**Funding:** There was no funding source of for this study.

**Corresponding Author:**

Vineet Chopra, MD, MSc

2800 Plymouth Road, Building 16 #432W

Ann Arbor, MI 48109

vineetc@med.umich.edu

1  
2  
3 **Conflicts of Interest:** No Authors Report Any Conflicts of Interest Related to This  
4  
5 Study.  
6  
7  
8  
9

10 **Acknowledgements:** The authors thank Drs. Rachel Thompson, Rajesh Patel,  
11  
12 Gabrielle Berger, Daniel Cabrera, Talawnda Bragg, Stephanie Yuen, Scarlett Shader,  
13  
14 Anaiah Massey and Sabian Taylor for their assistance with data collection at their  
15  
16 respective sites. Additionally, the authors thank Angie Fagerlin, PhD and Brian  
17  
18 Zikmund-Fisher, PhD for their assistance with survey instrument design.  
19  
20  
21  
22  
23

24 **Conception of the work:** Chopra, Petrilli, Saint  
25

26 **Design of the work:** Chopra, Fagerlin, Petrilli, Saint, Zikmund-Fisher  
27

28 **Acquisition of the data:** Berger, Bragg, Cabrera, Caruso, Chopra, Jennings, Kuhn,  
29  
30 Massey, Patel, Petrilli, Saint, Shader, Snyder, Taylor, Thompson, Yuen  
31  
32

33 **Analysis and interpretation of the data:** AC, VC, JJ, LK, CP, SS, AS  
34

35 **Drafting and critical revision of the manuscript for important intellectual**  
36  
37 **content:** AC, VC, JJ, LK, CP, SS, AS  
38  
39

40 **Accountable for all aspects of the work and approval of the final manuscript:** AC,  
41  
42 VC, JJ, LK, CP, SS, AS  
43  
44  
45  
46  
47  
48  
49  
50  
51  
52  
53  
54  
55  
56  
57  
58  
59  
60

1  
2  
3 **OBJECTIVES:** Several large studies have shown that improving the patient experience is  
4 associated with higher reported patient satisfaction, increased adherence to  
5 recommended treatment plans and clinical outcomes. Whether physician attire can  
6 affect the patient experience—and how this influences satisfaction— is unknown.  
7  
8 Therefore, we performed a national, cross-sectional study to examine patient  
9 perceptions, expectations and preferences regarding physicians dress.  
10  
11  
12  
13  
14  
15  
16  
17  
18

19 **SETTING:** Ten academic hospitals in the United States.  
20  
21  
22  
23

24 **PARTICIPANTS:** Convenience sample of 4,062 patients recruited from June 1, 2015 to  
25 October 31, 2016.  
26  
27  
28  
29  
30

31 **PRIMARY AND SECONDARY OUTCOMES MEASURED:** We conducted a questionnaire-based  
32 study of patients across ten academic hospitals in the United States. The questionnaire  
33 included photographs of the same male and female physician dressed in seven different  
34 forms of attire and were asked to rate the provider pictured in various clinical settings.  
35 Preference for attire was calculated as the composite of five domains (knowledgeable,  
36 trustworthy, caring, approachable, and comfortable) via a standardized instrument.  
37  
38 Secondary outcome measures included variation in preferences by respondent  
39 characteristics (e.g., gender), context of care (e.g., inpatient vs. outpatient) and  
40 geographic region.  
41  
42  
43  
44  
45  
46  
47  
48  
49  
50  
51  
52  
53  
54  
55  
56  
57  
58  
59  
60

1  
2  
3 **RESULTS:** Of 4,062 patient responses, 53% indicated that that physician attire was  
4  
5 important to them during care. Over one third agreed that it influenced their satisfaction  
6  
7 with care. Compared to all other forms of attire, formal attire with a white coat was most  
8  
9 highly rated ( $p=0.001$  vs. scrubs with white coat;  $p<0.001$  all other comparisons).  
10  
11 Important differences in preferences for attire by clinical context and respondent  
12  
13 characteristics were noted. For example, respondents  $\geq 65$  years preferred formal attire  
14  
15 with white coats ( $p<0.001$ ) while scrubs were most preferred for surgeons.  
16  
17  
18  
19  
20

21 **CONCLUSIONS:** Important perceptions and expectations for physician dress that vary by  
22  
23 patients, context, and region exist. Nuanced policies addressing physician dress code to  
24  
25 improve patient satisfaction appear important.  
26  
27  
28  
29  
30

31 **TRIAL REGISTRATION:** Observational study, not registered  
32  
33  
34  
35  
36  
37  
38  
39  
40  
41  
42  
43  
44  
45  
46  
47  
48  
49  
50  
51  
52  
53  
54  
55  
56  
57  
58  
59  
60

### STRENGTHS AND LIMITATIONS OF THIS STUDY

- The largest study to examine patient preferences for physician attire. Given methodological strengths including randomization of instrument sequence, as well as inclusion of diverse regions and patient populations, our findings clarify possible dress codes in various healthcare settings.
- Our study and survey instrument were specifically designed to avoid biases associated with images. For example, we hired a professional photographer and studio to ensure photographs of physicians were otherwise identical. Similarly, we also used models of the same race (Caucasian) with identical postures and facial expressions so as to limit confounding associated with models of different backgrounds or appearance as has occurred in previous studies.
- Our findings have policy implications: namely, patients appear to care about attire and may expect to see their doctor in certain ways. Hospitals, clinics, emergency departments and ambulatory surgical centers should consider using these data to set dress codes for physicians providing care in these settings.
- The providers pictured in our survey instrument were young, slender, Caucasian and all cared for in academic settings, which may have introduced bias into responses. Similarly, we did not record information for patients who refused to participate in the study, also potentially introducing bias
- While approaching patients as they were receiving care helps generate validity, it is possible that reported impressions may not reflect actual preferences.

## INTRODUCTION

At its core, the practice of medicine hinges on the patient-physician relationship. From initial introductions, physicians work to build rapport to foster a partnership to provide patient-centered care, defined as that which is: “respectful of, and responsive to, individual patient preferences, needs and values.”<sup>1</sup> Not surprisingly, medical school curricula often include courses aimed at improving the patient experience.<sup>2</sup> Similarly, since 2007, the Centers for Medicare and Medicaid have required hospitals to collect, submit and publicly report the results of the Hospital Consumer Assessment of Healthcare Providers and Systems (HCAHPS) survey or risk financial penalties.<sup>3</sup> These data are also important because they have been linked to clinical outcomes. For example, a positive correlation between patient satisfaction, improved mortality and reduced 30-day readmissions have been reported.<sup>4-8</sup>

Although improving the patient experience, and consequently satisfaction, is an important target for many hospitals, how best to do this is unclear. One approach is to understand how physician attire influences the patient experience and develop guidelines based on patients’ preferences. Indeed, some healthcare systems across the country have adopted stringent dress codes. In a recently published article, we contacted human resource professionals and administrators at top US News & World Report Hospitals,<sup>9</sup> and found that five had written guidelines endorsing formal and professional attire. Yet patient preferences for physician attire are not straightforward. In a systematic review, we found that while patients preferred formal attire and white coats overall, attire such as scrubs or casual dress were preferred in specific settings.<sup>9</sup> These findings make intuitive sense: patients often have notions of how a “professional” should



1  
2  
3 dress and are more likely to respond positively to those that meet these stereotypes.  
4  
5 Strategies targeting physician dress may therefore enhance trust and satisfaction.  
6

7  
8 To date, no studies have examined whether physician dress may influence  
9  
10 satisfaction and, if so, what types of attire might be most relevant. Additionally, whether  
11  
12 these preferences vary by context of care (e.g., inpatient vs. outpatient setting), patient  
13  
14 characteristics (e.g., age and gender) or region is not known. Therefore, we performed  
15  
16 a cross-sectional survey of patients receiving care across the US using a standardized  
17  
18 questionnaire to better understand these issues.  
19  
20  
21  
22  
23

## 24 **METHODS**

### 25 26 *Study design and population*

27  
28 Between June 1, 2015 to October 31, 2016, a total of 6,280 surveys  
29  
30 were provided to ten academic medical centers in the United States (US) of  
31  
32 which 4,062 surveys were filled and available for analyses (response rate = 65%). The  
33  
34 questionnaire consisted of 22 questions and included photographs of a male and a  
35  
36 female physician in various forms of attire. The questionnaire was administered to adult  
37  
38 patients that were receiving care in clinics (outpatients) or admitted to the hospital  
39  
40 (inpatients). At all sites, the questionnaire was administered by research staff using  
41  
42 paper instruments. Respondents provided verbal consent. No identifying information  
43  
44 was collected from those that completed the study.  
45  
46  
47  
48  
49  
50

### 51 *Study design and data collection*

52  
53  
54  
55  
56  
57  
58  
59  
60

1  
2  
3 The questionnaire was developed from a systematic review that examined the  
4 role of physician attire on patient preferences and satisfaction.<sup>9</sup> A multidisciplinary team  
5 of psychometricians, research scientists, choice architects, survey experts, and  
6 bioethicists developed the study instrument. Each question sought to elicit preferences  
7 regarding various forms of physician attire, including: casual, casual with white coat,  
8 scrubs, scrubs with white coat, formal, formal with white coat, and business suit (**Figure**  
9 **1**). Photographs of the same Caucasian male and female physician donning such attire  
10 were taken by a professional photographer with strict attention to facial expressions,  
11 pose, lighting, and other non-verbal cues as these may influence preference or likability.  
12  
13  
14  
15  
16  
17  
18  
19  
20  
21  
22  
23

24 To avoid bias, 14 different versions of the study instrument were created, and  
25 distribution of the questionnaires was randomized to participants. In each version, the  
26 gender and attire of the first physician model varied to prevent ordering, priming or  
27 anchoring effects (**Supplementary File**). The questionnaire had four sections: in the  
28 first section, respondents were asked to rate the physician depicted across five domains  
29 including knowledge, trust, care, approachability, and comfort. In the second section,  
30 respondents were presented with seven photographs of the same physician wearing  
31 different attire and asked to select their preference in various clinical settings. The third  
32 and fourth sections sought respondents' general opinions regarding physician attire,  
33 demographic data and frequency of interactions with physicians.  
34  
35  
36  
37  
38  
39  
40  
41  
42  
43  
44  
45  
46

47 Before administration, the survey instrument was pilot-tested with a convenience  
48 sample of patients at the lead site to ensure photographs, questions, ratings, and  
49 randomly generated order of the 14 surveys at each site would functioned as desired.  
50  
51  
52  
53  
54  
55  
56  
57  
58  
59  
60

### *Measurements*

Ratings regarding how knowledgeable, trustworthy, caring, and approachable each physician appeared, as well as how comfortable the physician made the respondent feel, were measured using a 1-10 scale, where 1 indicated “somewhat preferred” vs. 10 “extremely preferred.” Preference of attire within specific care settings (e.g., primary care, emergency room, hospital, surgery, and overall) was assessed using photos for each of the 7 attire categories. Respondent opinions regarding importance of dress and white coats were collected using a 1-5 Likert scale, where 1 indicated “strongly disagree” and 5 indicated “strongly agree.” We assessed patient satisfaction based on agreement with two questions: “How my doctor dresses is important to me,” and “How my doctor dresses influences how happy I am with the care received.” For analyses, responses were trichotomized as follows: agreement = strongly agree and agree; neither agree nor disagree; and disagreement = disagree or strongly disagree. Demographics including age, gender, education level, race, and number of physician encounters were collected. Preferences for attire and demographics were dichotomized for bivariate comparison. Questions that were unanswered or where more than one response was entered were excluded.

### *Outcomes*

The primary outcome of interest – preference for attire -- was calculated as the composite average of the five individual rating domains (knowledgeable, trustworthy, caring, approachable, and comfortable). Additionally, variation in preferences for physician attire by respondent characteristics (e.g., gender, age), context of care (e.g.,

1  
2  
3 inpatient vs. outpatient) and geographical region (e.g., Northeast, Midwest, South, and  
4  
5 West) were also assessed.  
6  
7  
8  
9

### 10 *Statistical analyses*

11  
12 Data from paper questionnaires were entered independently and in duplicate.  
13  
14 Since respondents were not required to answer all questions, the denominator for  
15  
16 individual questions (and associated response rate) varied. Descriptive statistics  
17  
18 (means, percentage) and standard deviation (SD) were initially used to tabulate results.  
19  
20 Differences in the mean composite rating scores from the physician ratings section were  
21  
22 assessed using one-way ANOVA. To reduce the potential for Type I error, post-  
23  
24 estimation pairwise comparisons were performed using the Tukey-Kramer method.<sup>2</sup>  
25  
26 Differences in proportions for categorical data were compared using the Z-test. Bivariate  
27  
28 comparisons between respondent characteristics and preferences for attire were  
29  
30 assessed using Chi-squared tests. A two-sided p-value of less than 0.05 was  
31  
32 considered statistically significant. All analyses were performed using Stata 14 MP/SE  
33  
34 (StataCorp, College Station, TX).  
35  
36  
37  
38  
39  
40  
41

### 42 *Ethical and Regulatory Oversight*

43  
44 The study was reviewed and deemed exempt from regulation by the University  
45  
46 of Michigan Institutional Review Board (HUM00085305).  
47  
48  
49  
50

## 51 **RESULTS**

52  
53 A total of 4,062 questionnaires were completed by patients across ten academic  
54  
55  
56  
57  
58  
59  
60

1  
2  
3 medical centers in the United States. Respondents represented all parts of the United  
4 States including the Northeast, Midwest, South and West. Most patients were surveyed  
5 while admitted to the hospital (n=2,616 [64%]); however, a substantial proportion of  
6 outpatients were also included (n=1,446 [36%]). Respondents were most often white  
7 (71%) and male (65%). The plurality of patients was 65 years of age or older (36%).  
8 Seventy percent of those surveyed indicated having attended some college or having  
9 college degrees. With respect to interactions with the health system, 38% of  
10 respondents reported 6 or more physician visits in the past year (**Table 1**).  
11  
12  
13  
14  
15  
16  
17  
18  
19  
20  
21  
22  
23

#### 24 *Ratings of Physician Attire*

25  
26 Respondents rated formal attire with white coat for both male and female  
27 physician models as the most preferred form of dress compared to other forms of attire  
28 with a mean composite score of 8.1 (SD 1.8) [all pairwise comparisons  $p < 0.001$ ].  
29 Cronbach's alpha for the 5-items included in the composite score was 0.96.. Ratings for  
30 formal attire with white coat were greatest across all domains including how  
31 knowledgeable, trustworthy, caring, and approachable the physician appeared as well  
32 as how comfortable the physician made the respondent feel. Moreover, these findings  
33 were significant in the domains of trustworthiness, caring and how comfortable the  
34 physician made the respondent feel in all pairwise comparison testing to other forms of  
35 attire ( $p < 0.05$ ). For the rating of approachability, formal attire with a white coat was not  
36 statistically different from scrubs with a white coat or formal without a white coat in  
37 pairwise comparison. Scrubs with white coat ranked second overall, with a mean  
38  
39  
40  
41  
42  
43  
44  
45  
46  
47  
48  
49  
50  
51  
52  
53  
54  
55  
56  
57  
58  
59  
60

1  
2  
3 composite score of 7.6 (SD=1.9) followed by formal attire without a white coat with a  
4 mean composite score of 7.5 (SD=2.0) (**Figure 2**).

### 10 *Preferences for Physician Attire by Care Settings*

12 When examining preferences for physician attire by care setting, important  
13 differences emerged. Formal attire with white coat was preferred by respondents for  
14 their primary care (44%) and hospital physician (39%). Conversely, scrubs were rated  
15 highest for emergency room physicians (40%) and surgeons (42%). In both emergency  
16 and surgery settings, scrubs alone were followed in preference by scrubs with white  
17 coats (34% and 23%, respectively). When asked, "Overall, which clothes do you feel  
18 that your doctor should wear?" most respondents preferred formal attire with white coat  
19 (44%) followed by scrubs with white coat (26%) (**Table 2**). Excluding surgeons,  
20 respondents universally preferred physicians in white coats over no white coats. When  
21 evaluating surgeons, respondents indicated no preference for a white coat on female  
22 physicians ( $p=0.85$ ), but preferred male physicians without white coats ( $p<0.001$ ). No  
23 differences in preference by physician gender in other clinical care settings were noted  
24 (**Figure 3**).

### 44 *Perceived Influence on Satisfaction, Importance and Appropriateness of Physician Attire*

46 More than half (53%) of the patients surveyed agreed with the statement that  
47 how their doctor dresses was important to them, while 36% of respondents agreed with  
48 the statement that physician attire influenced how happy they were with the care they  
49 received. Views regarding appropriateness of casual attire when physicians see  
50  
51  
52  
53  
54  
55  
56  
57  
58  
59  
60

1  
2  
3 patients on the weekends were mixed: 44% of respondents stated this was appropriate  
4  
5 while 56% were either neutral or disagreed with the practice.  
6

7  
8 Specific questions regarding when physicians should don a white coat elicited  
9  
10 various preferences. Most respondents (55%) indicated that they agreed or strongly  
11  
12 agreed with the statement that doctors should wear a white coat when seeing patients  
13  
14 in the office. In the emergency room, however, 44% agreed with the statement that  
15  
16 physicians should wear a white coat when seeing patients vs. 56% that indicated either  
17  
18 no preference (38%) or disagreement (18%). When asked whether doctors should wear  
19  
20 a white coat when seeing patients in the hospital, the majority of respondents (62%)  
21  
22 agreed or strongly agreed with this statement (**Table 3**).  
23  
24  
25  
26  
27

### 28 *Variations in Patient Preferences of Physician Attire*

29  
30  
31 Important variations in patient preferences for attire were noted. For example,  
32  
33 female respondents more often preferred scrubs with white coats in emergency room  
34  
35 and hospital settings than males (41% vs. 31% [ $p<0.001$ ] and 32% vs. 27% [ $p=0.001$ ],  
36  
37 respectively). However, both genders indicated formal attire with white coat was overall  
38  
39 most preferred (43% and 44%, respectively). In hospital settings, respondents 65 years  
40  
41 of age or older frequently preferred formal attire with white coats than younger patients  
42  
43 (44% vs. 36%,  $p<0.001$ ). Conversely, younger patients more often preferred scrubs and  
44  
45 white coats than formal attire overall (28% vs. 21%,  $p<0.001$ ). Some differences in  
46  
47 preferences regarding physician dress based on respondent education level were also  
48  
49 noted. Specifically, respondents with a college degree preferred formal and white coat  
50  
51  
52  
53  
54  
55  
56  
57  
58  
59  
60

1  
2  
3 for their primary care provider more often than those without a college degree (48% vs.  
4  
5 42%,  $p<0.001$ ).

6  
7  
8 No differences in preferences between those with three or more physician visits  
9  
10 in the preceding year vs. those with less frequent visits were noted. Similarly,  
11  
12 preferences for attire did not vary by setting in which respondents were polled, although  
13  
14 respondents in the outpatient setting more often preferred doctors in the hospital to  
15  
16 wear scrubs and a white coat compared to hospitalized respondents (32% vs. 27%,  
17  
18  $p=0.002$ ). However, preferences for attire did vary by geographic region. For example,  
19  
20 while formal attire and white coats were preferred across all regions, 50% of  
21  
22 respondents in the West and 51% in the South selected this as their preferred option  
23  
24 compared to 38% and 40% in the Northeast and Midwest, respectively. Conversely,  
25  
26 over half of all respondents in the Northeast selected scrubs as their preferred attire for  
27  
28 surgeons compared to a quarter of respondents in the South (54% vs. 25%,  $p<0.001$ ).

## 32 33 34 35 **CONCLUSIONS**

36  
37 This study of over 4,000 patients receiving medical care in diverse academic  
38  
39 medical centers is the largest to report preferences regarding physician attire in the US.  
40  
41 Over half of the participants indicated that how a physician dresses was important to  
42  
43 them, with over one in three stating that this influenced how happy they were with care  
44  
45 received. Overall, respondents indicated that formal attire with white coats was the most  
46  
47 preferred form of physician dress. However, in settings such as surgery or emergency  
48  
49 rooms, scrubs with white coats were most preferred. Although variation in preferences  
50  
51 by respondent age, gender, education and geography were noted, these findings  
52  
53  
54  
55  
56  
57  
58  
59  
60



1  
2  
3 indicate that not only do most patients have expectations regarding doctor attire, but  
4 that a “professional” look matters most. Given the size, methodological rigor and  
5 representativeness of these data, policies addressing physician attire should be  
6 considered to improve patient satisfaction.  
7  
8  
9  
10

11  
12 Previous studies have shown that patients harbor conscious and unconscious  
13 biases when it comes to provider dress.<sup>10,11</sup> Thus, our finding that patients have specific  
14 preferences regarding physician attire was not surprising. What this study highlights,  
15 however, is the potential importance of physician attire to the physician-patient  
16 relationship. Indeed, specific clinical and contextual aspects appear to influence a  
17 patient’s preconceived notion of ‘professional attire’. For instance, we found that the  
18 locale where care is delivered (e.g., hospital vs. clinic) as well as context of care (e.g.,  
19 emergency room or surgery) affected preferences. Similarly, we observed that certain  
20 respondent characteristics such as age, gender, and education also influenced their  
21 preferences. These findings can potentially be used to improve the patient experience.  
22 For instance, providers engaged in care of elderly patients (e.g., geriatric clinics,  
23 hospital settings or extended-care facilities) may consider donning formal attire more so  
24 than surgeons or emergency room physicians where scrubs may be more important.  
25 Similarly, hospitals in southern regions of the US may wish to endorse formal attire and  
26 white coats as their preferred policy. For providers in the emergency room and surgical  
27 arenas, such attire may in fact be viewed as out of place – and thus different rules might  
28 be necessary. These examples illustrate how policies for specific doctors, settings or  
29 patients can be leveraged to focus on patient-centered care.  
30  
31  
32  
33  
34  
35  
36  
37  
38  
39  
40  
41  
42  
43  
44  
45  
46  
47  
48  
49  
50  
51  
52  
53  
54  
55  
56  
57  
58  
59  
60

1  
2  
3 How should one interpret these findings given concerns for infection transmission  
4 associated with physician dress? Previous studies have shown that bacteria and  
5 pathogens can be isolated from white coats, neckties and sleeves of medical  
6 providers.<sup>12-20</sup> These studies are one of the reasons why a “bare below the elbows”  
7 (BBE) policy exists in some countries. While we did not specifically ask respondents to  
8 consider this risk when choosing attire preferences, three aspects deserve discussion.  
9  
10 First, despite the abundance of literature on infection prevention, we are unaware of any  
11 study that links physician dress to source or transmission of infection. Rather, one study  
12 randomly sampled physicians’ fingertips and reported no association between BBE-  
13 compliant versus non-compliant attire and presence of bacterial colony-forming units or  
14 clinically significant organisms.<sup>21</sup> Second, evidence suggests that other practices (e.g.,  
15 hand hygiene) may be more relevant than physician dress in preventing infection. In an  
16 institution-wide study at Vanderbilt University Medical Center, direct observation  
17 combined with financial incentives for appropriate hand hygiene increased compliance  
18 with hand hygiene policies and decreased device-associated standardized infection  
19 ratios.<sup>22</sup> Conversely, wearing a white coat has been associated with increased selective  
20 and sustained attentiveness to tasks.<sup>23</sup> These findings suggest that clothing may  
21 influence the wearer’s own psychological processes, a phenomenon coined “enclothed  
22 cognition.”<sup>24</sup> Therefore, attentiveness to hand hygiene may, in fact, be increased when  
23 physicians wear white coats or formal attire – improving patient care and  
24 satisfaction.<sup>25,26</sup> Third, we add to the growing body of evidence that suggests patients  
25 have preferences regarding attire.<sup>9,10,27-47</sup> Physician attire may offer an important  
26  
27  
28  
29  
30  
31  
32  
33  
34  
35  
36  
37  
38  
39  
40  
41  
42  
43  
44  
45  
46  
47  
48  
49  
50  
51  
52  
53  
54  
55  
56  
57  
58  
59  
60

1  
2  
3 modifiable variable in the doctor-patient relationship that could improve patient  
4  
5 experience and satisfaction and ultimately produce better outcomes.<sup>48-50</sup>  
6

7  
8 Our study has several limitations. First, as with other studies of physician attire,  
9  
10 we showed respondents pictures of providers and elicited preferences via a paper  
11  
12 questionnaire. Our providers were young, slender, Caucasian and all cared for in  
13  
14 academic settings, which may have introduced bias into responses. Similarly, we did  
15  
16 not record information for patients who refused to participate in the study, also  
17  
18 potentially introducing bias. Second, while approaching patients as they were receiving  
19  
20 care helps generate validity, it is possible that reported impressions may not reflect  
21  
22 actual preferences. Third, we asked patients to report preferences via Likert scales and  
23  
24 predefined categories. Although this allows for a range of answers (including a neither  
25  
26 agree or disagree option), such categorizations may force respondents to answer in  
27  
28 ways that do not capture their true feelings. Fourth, while the proportion of Caucasian  
29  
30 respondents were similar to 2010 Census data estimates, a lower than expected  
31  
32 number of Hispanic respondents (5% compared with 16% estimated by the Census  
33  
34 data) participated.<sup>51</sup> Thus, whether our findings will hold true across race or ethnicity is  
35  
36 not known. Finally, we did not include questions regarding infection transmission given  
37  
38 the lack of evidence supporting the notion that white coats or attire is associated with  
39  
40 infections.  
41  
42  
43  
44  
45

46  
47 Our study also has important strengths. First, this is the largest study to examine  
48  
49 patient preferences for physician attire. Given methodological strengths including  
50  
51 randomization of instrument sequence, as well as inclusion of diverse regions and  
52  
53 patient populations, our findings clarify possible dress codes in various healthcare  
54  
55  
56  
57  
58  
59  
60

1  
2  
3 settings. Second, in contrast to other studies, we specifically designed our study and  
4  
5 survey instrument to avoid biases associated with images. For example, we hired a  
6  
7 professional photographer and studio to ensure photographs of physicians were  
8  
9 otherwise identical. Similarly we also used models of the same race (Caucasian) with  
10  
11 identical postures and facial expressions so as to limit confounding associated with  
12  
13 models of different backgrounds or appearance as has occurred in previous  
14  
15 studies.<sup>29,36,37,39,45</sup> Additionally, we implemented strategies during survey collection such  
16  
17 as randomizing order of delivery and images to minimize bias. These approaches help  
18  
19 lend a high degree of internal validity to our findings. Third, our findings have policy  
20  
21 implications: namely, patients appear to care about attire and may expect to see their  
22  
23 doctor in certain ways. Hospitals, clinics, emergency departments and ambulatory  
24  
25 surgical centers should consider using these data to set dress codes for physicians  
26  
27 providing care in these settings.  
28  
29  
30  
31  
32

33 In summary, while physician attire cannot replace excellent clinical care, our data  
34  
35 suggest that it may impact how patients perceive care and perhaps how willing they are  
36  
37 to trust their doctors. In an era of patient-centeredness and patient satisfaction,  
38  
39 physician attire may be an important, modifiable component of patient care. As  
40  
41 perceptions and expectations regarding physician dress by patients, context, and region  
42  
43 exist, nuanced policies that target such factors appear relevant. Future studies  
44  
45 implementing such policies in both hospital, clinic and emergency room settings appear  
46  
47 necessary.  
48  
49  
50  
51  
52  
53  
54  
55  
56  
57  
58  
59  
60

## References

1. Medicine Io. Crossing the Quality Chasm: A New Health System for the 21st Century. Washington, DC: National Academy Press; 2001.
2. Parent K, Jones K, Phillips L, Stojan JN, House JB. Teaching Patient- and Family-Centered Care: Integrating Shared Humanity into Medical Education Curricula. *AMA J Ethics* 2016;18:24-32.
3. The HCAHPS Survey - Frequently Asked Questions. (Accessed 4/28/2017, 2017, at <https://www.cms.gov/Medicare/Quality-Initiatives-Patient-Assessment-Instruments/HospitalQualityInits/Downloads/HospitalHCAHPSFactSheet201007.pdf>.)
4. Manary MP, Boulding W, Staelin R, Glickman SW. The patient experience and health outcomes. *N Engl J Med* 2013;368:201-3.
5. Boulding W, Glickman SW, Manary MP, Schulman KA, Staelin R. Relationship between patient satisfaction with inpatient care and hospital readmission within 30 days. *Am J Manag Care* 2011;17:41-8.
6. Jha AK, Orav EJ, Zheng J, Epstein AM. Patients' perception of hospital care in the United States. *N Engl J Med* 2008;359:1921-31.
7. Barbosa CD, Balp MM, Kulich K, Germain N, Rofail D. A literature review to explore the link between treatment satisfaction and adherence, compliance, and persistence. *Patient Prefer Adher* 2012;6:39-48.
8. O'Malley AS, Forrest CB, Mandelblatt J. Adherence of low-income women to cancer screening recommendations. *Journal of general internal medicine* 2002;17:144-54.

- 1  
2  
3 9. Petrilli CM, Mack M, Petrilli JJ, Hickner A, Saint S, Chopra V. Understanding the  
4 role of physician attire on patient perceptions: a systematic review of the literature--  
5 targeting attire to improve likelihood of rapport (TAILOR) investigators. *BMJ Open*  
6 2015;5:e006578.  
7
- 8 10. Rehman SU, Nietert PJ, Cope DW, Kilpatrick AO. What to wear today? Effect of  
9 doctor's attire on the trust and confidence of patients. *American Journal of Medicine*  
10 2005;118:1279-86.  
11
- 12 11. Beach MC, Fitzgerald A, Saha S. White coat hype: branding physicians with  
13 professional attire. *JAMA internal medicine* 2013;173:467-8.  
14
- 15 12. Bearman G, Bryant K, Leekha S, et al. Healthcare personnel attire in non-  
16 operating-room settings. *Infection control and hospital epidemiology : the official journal*  
17 *of the Society of Hospital Epidemiologists of America* 2014;35:107-21.  
18
- 19 13. Ditchburn I. Should doctors wear ties? *J Hosp Infect* 2006;63:227-8.  
20
- 21 14. Munoz-Price LS, Arheart KL, Mills JP, et al. Associations between bacterial  
22 contamination of health care workers' hands and contamination of white coats and  
23 scrubs. *Am J Infect Control* 2012;40:e245-8.  
24
- 25 15. Gaspard P, Eschbach E, Gunther D, Gayet S, Bertrand X, Talon D. Meticillin-  
26 resistant *Staphylococcus aureus* contamination of healthcare workers' uniforms in long-  
27 term care facilities. *J Hosp Infect* 2009;71:170-5.  
28
- 29 16. Loh W, Ng VV, Holton J. Bacterial flora on the white coats of medical students. *J*  
30 *Hosp Infect* 2000;45:65-8.  
31  
32  
33  
34  
35  
36  
37  
38  
39  
40  
41  
42  
43  
44  
45  
46  
47  
48  
49  
50  
51  
52  
53  
54  
55  
56  
57  
58  
59  
60

- 1  
2  
3 17. Lopez PJ, Ron O, Parthasarathy P, Soothill J, Spitz L. Bacterial counts from  
4 hospital doctors' ties are higher than those from shirts. *Am J Infect Control* 2009;37:79-  
5  
6 80.  
7
- 8  
9  
10 18. Perry C, Marshall R, Jones E. Bacterial contamination of uniforms. *J Hosp Infect*  
11  
12 2001;48:238-41.  
13
- 14  
15 19. Bearman GM, Rosato A, Elam K, et al. A crossover trial of antimicrobial scrubs to  
16  
17 reduce methicillin-resistant *Staphylococcus aureus* burden on healthcare worker  
18  
19 apparel. *Infection control and hospital epidemiology : the official journal of the Society of*  
20  
21 *Hospital Epidemiologists of America* 2012;33:268-75.  
22
- 23  
24 20. Treakle AM, Thom KA, Furuno JP, Strauss SM, Harris AD, Perencevich EN.  
25  
26 Bacterial contamination of health care workers' white coats. *Am J Infect Control*  
27  
28 2009;37:101-5.  
29
- 30  
31 21. Willis-Owen CA, Subramanian P, Kumari P, Houlihan-Burne D. Effects of 'bare  
32  
33 below the elbows' policy on hand contamination of 92 hospital doctors in a district  
34  
35 general hospital. *J Hosp Infect* 2010;75:116-9.  
36
- 37  
38 22. Talbot TR, Johnson JG, Fergus C, et al. Sustained improvement in hand hygiene  
39  
40 adherence: utilizing shared accountability and financial incentives. *Infection control and*  
41  
42 *hospital epidemiology : the official journal of the Society of Hospital Epidemiologists of*  
43  
44 *America* 2013;34:1129-36.  
45
- 46  
47 23. Hutson M RT. *Dress for Success: How Clothes Influence Our Performance.*  
48  
49 *Scientific American* 2016 Jan 1, 2016.  
50
- 51  
52 24. Adam H GA. Enclothed Cognition. *J Exp Soc Psychol* 2012;48:918-25.  
53  
54  
55  
56  
57  
58  
59  
60

- 1  
2  
3 25. How a team of doctors at one hospital boosted hand washing, cut infections and  
4 created a culture of safety. Yahoo News, 2014. (Accessed June 12, 2017, 2017, at  
5  
6 [https://www.yahoo.com/news/clean-hands--vanderbilt-s-hand-washing-initiative-](https://www.yahoo.com/news/clean-hands--vanderbilt-s-hand-washing-initiative-172312795.html)  
7  
8 [172312795.html](https://www.yahoo.com/news/clean-hands--vanderbilt-s-hand-washing-initiative-172312795.html).)  
9  
10  
11  
12 26. Pittet D, Simon A, Hugonnet S, Pessoa-Silva CL, Sauvan V, Perneger TV. Hand  
13 hygiene among physicians: performance, beliefs, and perceptions. *Ann Intern Med*  
14 2004;141:1-8.  
15  
16  
17 27. Chung H, Lee H, Chang DS, Kim HS, Park HJ, Chae Y. Doctor's attire influences  
18 perceived empathy in the patient-doctor relationship. *Patient Education and Counseling*  
19 2012.  
20  
21  
22 28. Al-Ghobain MO, Al-Drees TM, Alarifi MS, Al-Marzoug HM, Al-Humaid WA, Asiry  
23 AM. Patients' preferences for physicians' attire in Saudi Arabia. *Saudi Medical Journal*  
24 2012;33:763-7.  
25  
26  
27 29. Au S, Khandwala F, Stelfox HT. Physician attire in the intensive care unit and  
28 patient family perceptions of physician professional characteristics. *JAMA internal*  
29 *medicine* 2013;173:465-7.  
30  
31  
32 30. Budny AM, Rogers LC, Mandracchia VJ, Lascher S. The physician's attire and its  
33 influence on patient confidence. *Journal of the American Podiatric Medical Association*  
34 2006;96:132-8.  
35  
36  
37 31. Cha A, Hecht BR, Nelson K, Hopkins MP. Resident physician attire: Does it  
38 make a difference to our patients? *American Journal of Obstetrics and Gynecology*  
39 2004;190:1484-8.  
40  
41  
42  
43  
44  
45  
46  
47  
48  
49  
50  
51  
52  
53  
54  
55  
56  
57  
58  
59  
60



- 1  
2  
3 32. Chang D-S, Lee H, Lee H, Park H-J, Chae Y. What to wear when practicing  
4 oriental medicine: patients' preferences for doctors' attire. *J Altern Complement Med*  
5 2011;17:763-7.  
6  
7  
8  
9  
10 33. Gallagher J, Waldron Lynch F, Stack J, Barragry J. Dress and address: patient  
11 preferences regarding doctor's style of dress and patient interaction. *Irish Medical*  
12 *Journal* 2008;101:211-3.  
13  
14  
15  
16 34. Gherardi G, Cameron J, West A, Crossley M. Are we dressed to impress? A  
17 descriptive survey assessing patients' preference of doctors' attire in the hospital  
18 setting. *Clinical Medicine, Journal of the Royal College of Physicians of London*  
19 2009;9:519-24.  
20  
21  
22  
23  
24  
25 35. Gooden BR, Smith MJ, Tattersall SJN, Stockler MR. Hospitalised patients' views  
26 on doctors and white coats. *Medical Journal of Australia* 2001;175:219-22.  
27  
28  
29  
30 36. Kocks JWH, Lisman-van Leeuwen Y, Berkelmans PGJ. [Clothing make the  
31 doctor--patients have more confidence in a smartly dressed GP]. *Ned Tijdschr*  
32 *Geneeskd* 2010;154:A2898.  
33  
34  
35  
36  
37 37. Lill MM, Wilkinson TJ. Judging a book by its cover: Descriptive survey of patients'  
38 preferences for doctors' appearance and mode of address. *British Medical Journal*  
39 2005;331:1524-7.  
40  
41  
42  
43  
44 38. Maruani A, Leger J, Giraudeau B, et al. Effect of physician dress style on patient  
45 confidence. *Journal of the European Academy of Dermatology and Venereology* 2012.  
46  
47  
48  
49 39. McKinstry B, Wang JX. Putting on the style: what patients think of the way their  
50 doctor dresses. *The British journal of general practice : the journal of the Royal College*  
51 *of General Practitioners* 1991;41:270, 5-8.  
52  
53  
54  
55  
56  
57  
58  
59  
60

- 1  
2  
3 40. McNaughton-Filion L, Chen JS, Norton PG. The physician's appearance. *Fam*  
4  
5 *Med* 1991;23:208-11.  
6  
7  
8 41. Niederhauser A, Turner MD, Chauhan SP, Magann EF, Morrison JC. Physician  
9  
10 attire in the military setting: does it make a difference to our patients? *Military Medicine*  
11  
12 2009;174:817-20.  
13  
14 42. Hartmans C HS, Lagrain M, Asch KV, Schoenmakers B. The Doctor's New  
15  
16 *Clothes: Professional or Fashionable? Primary Health Care* 2014;3.  
17  
18 43. Kurihara H, Maeno T, Maeno T. Importance of physicians' attire: factors  
19  
20 influencing the impression it makes on patients, a cross-sectional study. *Asia Pacific*  
21  
22 *family medicine* 2014;13:2.  
23  
24 44. McLean C, Patel P, Sullivan C, Thomas M. Patients' perception of military  
25  
26 doctors in fracture clinics--does the wearing of uniform make a difference? *Journal of*  
27  
28 *the Royal Naval Medical Service* 2005;91:45-7.  
29  
30 45. Sotgiu G, Nieddu P, Mameli L, et al. Evidence for preferences of Italian patients  
31  
32 for physician attire. *Patient Prefer Adherence* 2012;6:361-7.  
33  
34 46. Yonekura CL, Certain L, Karen SK, et al. Perceptions of patients, physicians, and  
35  
36 Medical students on physicians' appearance. *Revista da Associacao Medica Brasileira*  
37  
38 2013;59:452-9.  
39  
40 47. Jennings JD, Ciaravino SG, Ramsey FV, Haydel C. Physicians' Attire Influences  
41  
42 Patients' Perceptions in the Urban Outpatient Orthopaedic Surgery Setting. *Clin Orthop*  
43  
44 *Relat Res* 2016;474:1908-18.  
45  
46  
47  
48  
49  
50  
51  
52  
53  
54  
55  
56  
57  
58  
59  
60

- 1  
2  
3 48. Jin J, Sklar GE, Min Sen Oh V, Chuen Li S. Factors affecting therapeutic  
4 compliance: A review from the patient's perspective. *Therapeutics and clinical risk*  
5  
6 management 2008;4:269-86.  
7  
8  
9  
10 49. Zolnierek KB, Dimatteo MR. Physician communication and patient adherence to  
11 treatment: a meta-analysis. *Med Care* 2009;47:826-34.  
12  
13  
14 50. Doyle C, Lennox L, Bell D. A systematic review of evidence on the links between  
15 patient experience and clinical safety and effectiveness. *BMJ Open* 2013;3.  
16  
17  
18 51. Humes KR JN, Ramirez RR. Overview of Race and Hispanic Origin: 2010. In:  
19 United States Department of Commerce EaSA, U.S. Census Bureau, ed.2011.  
20  
21  
22  
23  
24  
25  
26  
27  
28  
29  
30  
31  
32  
33  
34  
35  
36  
37  
38  
39  
40  
41  
42  
43  
44  
45  
46  
47  
48  
49  
50  
51  
52  
53  
54  
55  
56  
57  
58  
59  
60

## TABLES

**TABLE 1. Characteristics of Study Respondents and Sites\***

| <b>Characteristics</b>                                   | <b>N (%)</b>   |
|----------------------------------------------------------|----------------|
| <b>Age</b>                                               | <b>N=3998</b>  |
| 18-25                                                    | 151 (4)        |
| 26-34                                                    | 340 (9)        |
| 35-54                                                    | 952 (24)       |
| 55-64                                                    | 1103 (28)      |
| 65+                                                      | 1452 (36)      |
| <b>Gender</b>                                            | <b>N=3946</b>  |
| Female                                                   | 1374 (35)      |
| Male                                                     | 2572 (65)      |
| <b>Education</b>                                         | <b>N=3970</b>  |
| Less than High School                                    | 110 (3)        |
| High School                                              | 1080 (27)      |
| Some College                                             | 1101 (28)      |
| College                                                  | 1052 (27)      |
| Graduate Degree or Above                                 | 627 (16)       |
| <b>Race</b>                                              | <b>N=3974</b>  |
| White                                                    | 2802 (71)      |
| African American                                         | 731 (18)       |
| Asian                                                    | 79 (2)         |
| Hispanic                                                 | 181 (5)        |
| Other/Mixed Race                                         | 181 (5)        |
| <b>Number of Different Doctors Seen in the Past Year</b> | <b>N=3987</b>  |
| 0                                                        | 29 (1)         |
| 1                                                        | 250 (6)        |
| 2                                                        | 496 (12)       |
| 3                                                        | 637 (16)       |
| 4                                                        | 606 (15)       |
| 5                                                        | 440 (11)       |
| 6 or more                                                | 1529 (38)      |
| <b>Geographic Region</b>                                 | <b>N =4062</b> |
| Midwest                                                  | 2225           |
| Northeast                                                | 449            |
| West                                                     | 257            |
| South                                                    | 1131           |

**TABLE 2.** Respondent Preferences for Physician Attire (By Setting)

| <b>Preference for Physician Attire [by Setting]</b>                          | <b>Total<br/>no. (%)</b> |
|------------------------------------------------------------------------------|--------------------------|
| <b><i>Which doctor would you prefer for your primary care physician?</i></b> | <b>N=3959</b>            |
| Casual                                                                       | 133 (3)                  |
| Casual & White Coat                                                          | 417 (11)                 |
| Scrubs                                                                       | 201 (5)                  |
| Scrubs & White Coat                                                          | 586 (15)                 |
| Formal                                                                       | 610 (15)                 |
| Formal & White coat                                                          | 1758 (44)                |
| Business Suit                                                                | 254 (6)                  |
| <b><i>Which doctor would you prefer to see when visiting the ER?</i></b>     | <b>N=3966</b>            |
| Casual                                                                       | 54 (1)                   |
| Casual & White Coat                                                          | 240 (6)                  |
| Scrubs                                                                       | 1577 (40)                |
| Scrubs & White Coat                                                          | 1351 (34)                |
| Formal                                                                       | 113 (3)                  |
| Formal & White coat                                                          | 592 (15)                 |
| Business Suit                                                                | 39 (1)                   |
| <b><i>Which doctor would you prefer when in the hospital?</i></b>            | <b>N=3946</b>            |
| Casual                                                                       | 61 (2)                   |
| Casual & White Coat                                                          | 351 (9)                  |
| Scrubs                                                                       | 412 (10)                 |
| Scrubs & White Coat                                                          | 1126 (29)                |
| Formal                                                                       | 280 (7)                  |
| Formal & White coat                                                          | 1546 (39)                |
| Business Suit                                                                | 170 (4)                  |
| <b><i>Which doctor would you prefer for your surgeon?</i></b>                | <b>N=3952</b>            |
| Casual                                                                       | 32 (1)                   |
| Casual & White Coat                                                          | 151 (4)                  |
| Scrubs                                                                       | 1648 (42)                |
| Scrubs & White Coat                                                          | 926 (23)                 |
| Formal                                                                       | 150 (4)                  |
| Formal & White coat                                                          | 824 (21)                 |
| Business Suit                                                                | 221 (6)                  |
| <b><i>Overall, which clothes do you feel your doctor should wear?</i></b>    | <b>N=3924</b>            |
| Casual                                                                       | 60 (2)                   |
| Casual & White Coat                                                          | 292 (7)                  |
| Scrubs                                                                       | 329 (8)                  |
| Scrubs & White Coat                                                          | 1013 (26)                |
| Formal                                                                       | 340 (9)                  |
| Formal & White coat                                                          | 1708 (44)                |
| Business Suit                                                                | 182 (5)                  |

**TABLE 3.** Respondent Opinions Regarding Importance of Physician Attire

| <b>Opinions Regarding Influence and Appropriateness of Physician Dress</b>                            | <b>Total<br/>no. (%)</b> |
|-------------------------------------------------------------------------------------------------------|--------------------------|
| <b><i>How my doctor dresses is important to me.</i></b>                                               | <b>N=4016</b>            |
| Disagree or Strongly Disagree                                                                         | 593 (15)                 |
| Neither Agree nor Disagree                                                                            | 1286 (32)                |
| Agree or Strongly Agree                                                                               | 2,137 (53)               |
| <b><i>How my doctor dresses influences how happy I am with the care I receive.</i></b>                | <b>N=4010</b>            |
| Disagree or Strongly Disagree                                                                         | 931 (23)                 |
| Neither Agree nor Disagree                                                                            | 1620 (40)                |
| Agree or Strongly Agree                                                                               | 1,459 (36)               |
| <b><i>It is appropriate for a doctor to dress casually when seeing patients over the weekend.</i></b> | <b>N=4003</b>            |
| Disagree or Strongly Disagree                                                                         | 857 (21)                 |
| Neither Agree nor Disagree                                                                            | 1372 (34)                |
| Agree or Strongly Agree                                                                               | 1,774 (44)               |
| <b><i>Doctors should wear a white coat when seeing patients in their office.</i></b>                  | <b>N=4007</b>            |
| Disagree or Strongly Disagree                                                                         | 485 (12)                 |
| Neither Agree nor Disagree                                                                            | 1321 (33)                |
| Agree or Strongly Agree                                                                               | 2,201 (55)               |
| <b><i>Doctors should wear a white coat when seeing patient in the ER.</i></b>                         | <b>N=4005</b>            |
| Disagree or Strongly Disagree                                                                         | 704 (18)                 |
| Neither Agree nor Disagree                                                                            | 1519 (38)                |
| Agree or Strongly Agree                                                                               | 1,782 (44)               |
| <b><i>Doctors should wear a white coat when seeing patients in the hospital.</i></b>                  | <b>N=4006</b>            |
| Disagree or Strongly Disagree                                                                         | 346 (9)                  |
| Neither Agree nor Disagree                                                                            | 1188 (30)                |
| Agree or Strongly Agree                                                                               | 2,472 (62)               |
| <b><i>Doctors should always wear a white coat when seeing patients in any setting.</i></b>            | <b>N=4007</b>            |
| Disagree or Strongly Disagree                                                                         | 1,022 (26)               |
| Neither Agree nor Disagree                                                                            | 1641 (41)                |
| Agree or Strongly Agree                                                                               | 1,344 (34)               |

Note: Percentages may not add up to 100 due to rounding.

1  
2  
3  
4  
5  
6  
7  
8  
9  
10  
11  
12  
13  
14  
15  
16  
17  
18  
19  
20  
21  
22  
23  
24  
25  
26  
27  
28  
29  
30  
31  
32  
33  
34  
35  
36  
37  
38  
39  
40  
41  
42  
43  
44  
45  
46  
47

For peer review only

1  
2  
3 **FIGURES**  
4  
5  
6  
7

8 **Figure 1. Photographs of Model Male and Female Physician in Various Attire Used in Survey Instrument**  
9  
10  
11  
12  
13  
14  
15  
16  
17  
18  
19  
20  
21  
22  
23  
24  
25  
26  
27  
28  
29  
30  
31  
32  
33  
34  
35  
36  
37  
38  
39  
40  
41  
42  
43  
44  
45  
46  
47

For peer review only



1  
2  
3  
4  
5  
6  
7  
8  
9  
10  
11  
12  
13  
14  
15  
16  
17  
18  
19  
20  
21  
22  
23  
24  
25  
26  
27  
28  
29  
30  
31  
32  
33  
34  
35  
36  
37  
38  
39  
40  
41  
42  
43  
44  
45  
46  
47

**Figure 2. Rating of Physician Attire Across Preference Domains**

For peer review only

**Figure 3. Preference for white coat by clinical care setting and physician gender**

For peer review only

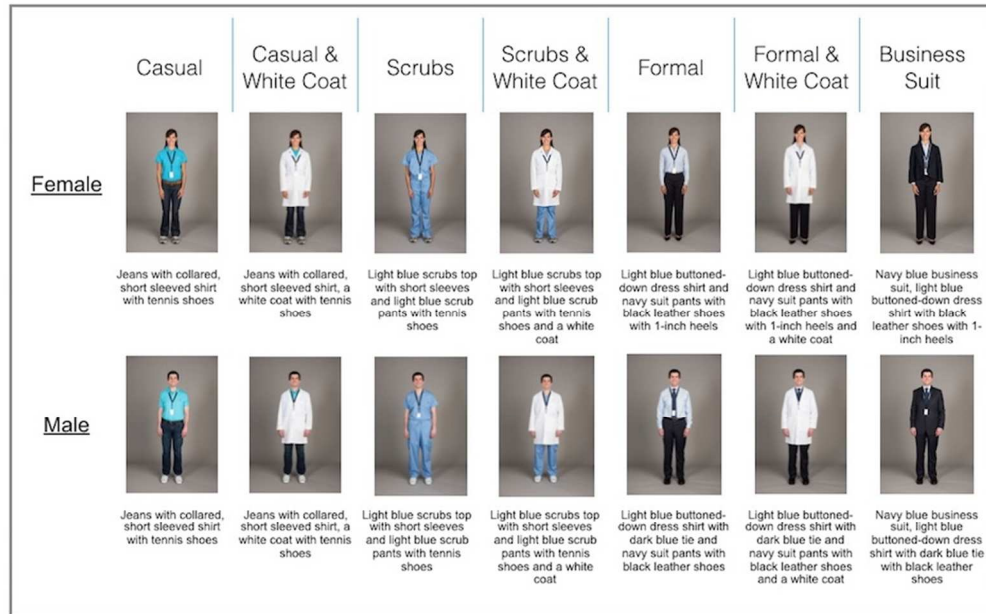

Figure 1. Photographs of Model Male and Female Physician in Various Attire Used in Survey Instrument

80x50mm (300 x 300 DPI)

Review only

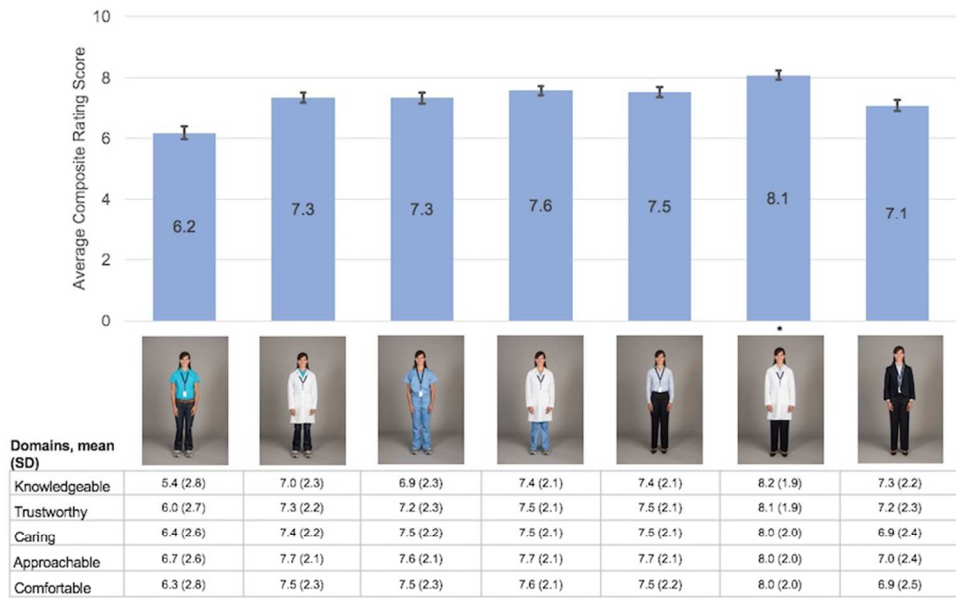

\*All comparisons of the composite score are significantly different when compared to the referent group (formal attire + white coat) at p<0.05.  
 Note: Female model is pictured for illustrative purposes. The data reflects ratings of physician attire for both male and female physician models.

Figure 2. Rating of Physician Attire Across Preference Domains

80x50mm (300 x 300 DPI)

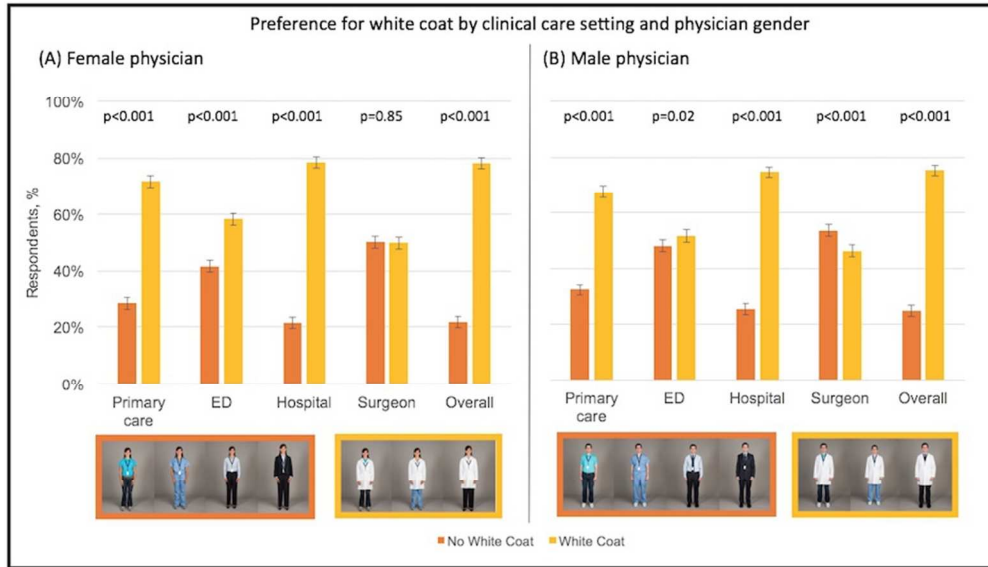

Figure 3. Preference for white coat by clinical care setting and physician gender

80x45mm (300 x 300 DPI)

## Understanding the Role of Physician Clothing on Patient Opinion

---

Thank you for taking the time to complete this survey. Your answers will help us better understand whether physician dress influences patients' opinions of their doctor.

Your responses are very important to us. There are no right or wrong answers and we are interested only in your honest opinions. This survey is brief and should take no more than 5 minutes to complete.

**In Section A please provide a rating by circling the number on the scale that corresponds to your answer.**

**In Sections B, C, and D, please provide your one best answer to each question.**

All of your answers will be kept confidential. We will not use names in any notes, reports, or summaries. Your responses will also not be shared with any of your doctors or care providers.

**Section A – Physician Attire - Ratings**

*Please rate the doctor for each of the following questions by circling the number that corresponds to your answer.*

|                                                                                    |                                                                  |                                                       |
|------------------------------------------------------------------------------------|------------------------------------------------------------------|-------------------------------------------------------|
| 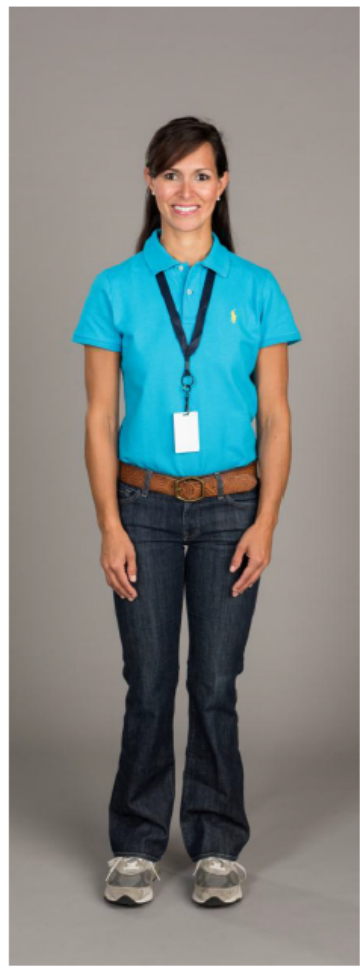 | <p>1) How <b>knowledgeable</b> does this doctor appear?</p>      | <p>1 2 3 4 5 6 7 8 9 10</p> <p>Somewhat Extremely</p> |
|                                                                                    | <p>2) How <b>trustworthy</b> does this doctor appear?</p>        | <p>1 2 3 4 5 6 7 8 9 10</p> <p>Somewhat Extremely</p> |
|                                                                                    | <p>3) How <b>caring</b> does this doctor appear?</p>             | <p>1 2 3 4 5 6 7 8 9 10</p> <p>Somewhat Extremely</p> |
|                                                                                    | <p>4) How <b>approachable</b> does this doctor appear?</p>       | <p>1 2 3 4 5 6 7 8 9 10</p> <p>Somewhat Extremely</p> |
|                                                                                    | <p>5) How <b>comfortable</b> does this doctor make you feel?</p> | <p>1 2 3 4 5 6 7 8 9 10</p> <p>Somewhat Extremely</p> |

**Section B – Physician Attire - Preferences**

*Please provide your ONE best answer to each of the following questions*

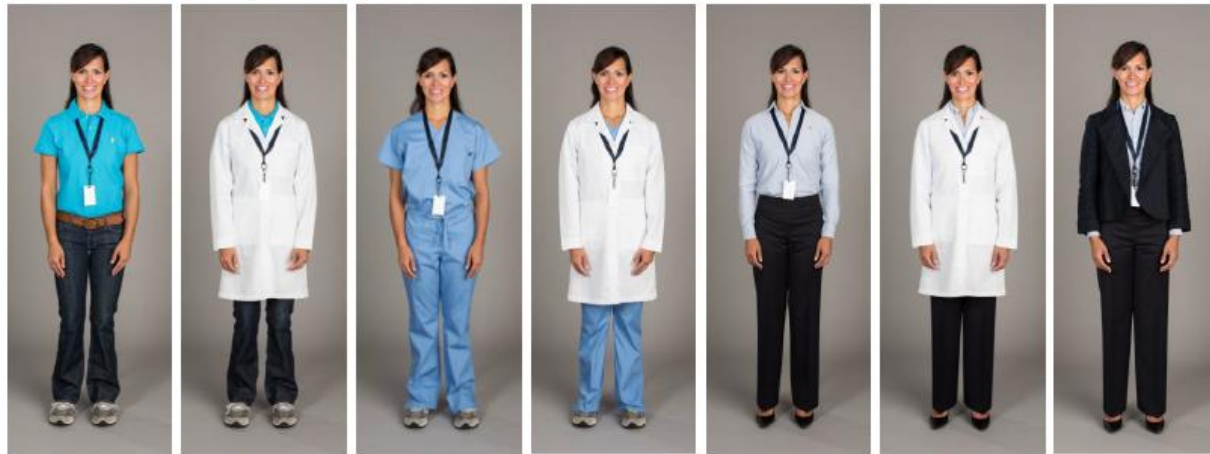

**A B C D E F G**

6) Which doctor would you prefer for your **primary care doctor**? (Please select only ONE option)

**A**     **B**     **C**     **D**     **E**     **F**     **G**

7) Which doctor would you prefer to see when visiting the **emergency room**? (Please select only ONE option)

**A**     **B**     **C**     **D**     **E**     **F**     **G**

8) Which doctor would you prefer to see when **in the hospital**? (Please select only ONE option)

**A**     **B**     **C**     **D**     **E**     **F**     **G**

9) Which doctor would you prefer for your **surgeon**? (Please select only ONE option)

**A**     **B**     **C**     **D**     **E**     **F**     **G**

10) **Overall**, which clothes do you feel doctors should wear? (Please select only ONE option)

**A**     **B**     **C**     **D**     **E**     **F**     **G**



**Section C – General Physician Attire**

*Please indicate your level of agreement with the following statements by checking ONE box to the left of your answer.*

11) How my doctor dresses is important to me.

Strongly Disagree       Disagree       Neither Agree nor Disagree       Agree       Strongly Agree

12) How my doctor dresses influences how happy I am with the care I receive.

Strongly Disagree       Disagree       Neither Agree nor Disagree       Agree       Strongly Agree

13) It is appropriate for a doctor to dress casually when seeing patients **over the weekend**.

Strongly Disagree       Disagree       Neither Agree nor Disagree       Agree       Strongly Agree

14) Doctors should wear a white coat when seeing patients **in their office or clinic**.

Strongly Disagree       Disagree       Neither Agree nor Disagree       Agree       Strongly Agree

15) Doctors should wear a white coat when seeing patients in the **emergency room**.

Strongly Disagree       Disagree       Neither Agree nor Disagree       Agree       Strongly Agree

16) Doctors should wear a white coat when seeing patients **in the hospital**.

Strongly Disagree       Disagree       Neither Agree nor Disagree       Agree       Strongly Agree

17) Doctors should always wear a white coat when seeing patients **in any setting**.

Strongly Disagree       Disagree       Neither Agree nor Disagree       Agree       Strongly Agree

**Section D – Demographics**

*Please remember that all of your answers will be kept confidential.*

18) How old are you?

- 18-25                       26-34                       35-54                       55-64                       65 or older

19) What is your gender?

- Male                       Female

20) What is the highest level of education you have completed?

- Less than High School       High School                       Some College                       College                       Graduate Degree

21) What is your race?

- American Indian/Alaska Native       Asian                       Native Hawaiian or Other Pacific Islander  
 Black or African American                       White                       Hispanic  
 Other (Please specify) \_\_\_\_\_

22) How many different doctors have you seen in the past year?

- 0                       1                       2                       3                       4                       5                       6 or more

---

**Thank you for taking the time to fill out our survey.  
Your input is greatly appreciated.**

STROBE 2007 (v4) Statement—Checklist of items that should be included in reports of cross-sectional studies

| Section/Topic             | Item # | Recommendation                                                                                                                                                                       | Reported on page # |
|---------------------------|--------|--------------------------------------------------------------------------------------------------------------------------------------------------------------------------------------|--------------------|
| Title and abstract        | 1      | (a) Indicate the study’s design with a commonly used term in the title or the abstract                                                                                               | 3                  |
|                           |        | (b) Provide in the abstract an informative and balanced summary of what was done and what was found                                                                                  | 3                  |
| <b>Introduction</b>       |        |                                                                                                                                                                                      |                    |
| Background/rationale      | 2      | Explain the scientific background and rationale for the investigation being reported                                                                                                 | 5-6                |
| Objectives                | 3      | State specific objectives, including any prespecified hypotheses                                                                                                                     | 6                  |
| <b>Methods</b>            |        |                                                                                                                                                                                      |                    |
| Study design              | 4      | Present key elements of study design early in the paper                                                                                                                              | 6                  |
| Setting                   | 5      | Describe the setting, locations, and relevant dates, including periods of recruitment, exposure, follow-up, and data collection                                                      | 6-7                |
| Participants              | 6      | (a) Give the eligibility criteria, and the sources and methods of selection of participants                                                                                          | 6-7                |
| Variables                 | 7      | Clearly define all outcomes, exposures, predictors, potential confounders, and effect modifiers. Give diagnostic criteria, if applicable                                             | 8-9                |
| Data sources/ measurement | 8*     | For each variable of interest, give sources of data and details of methods of assessment (measurement). Describe comparability of assessment methods if there is more than one group | 8-9                |
| Bias                      | 9      | Describe any efforts to address potential sources of bias                                                                                                                            | 7                  |
| Study size                | 10     | Explain how the study size was arrived at                                                                                                                                            | N/A                |
| Quantitative variables    | 11     | Explain how quantitative variables were handled in the analyses. If applicable, describe which groupings were chosen and why                                                         | 8-9                |
| Statistical methods       | 12     | (a) Describe all statistical methods, including those used to control for confounding                                                                                                | 9                  |
|                           |        | (b) Describe any methods used to examine subgroups and interactions                                                                                                                  | 9                  |
|                           |        | (c) Explain how missing data were addressed                                                                                                                                          | 9                  |
|                           |        | (d) If applicable, describe analytical methods taking account of sampling strategy                                                                                                   | N/A                |
|                           |        | (e) Describe any sensitivity analyses                                                                                                                                                | N/A                |
| <b>Results</b>            |        |                                                                                                                                                                                      |                    |

|                          |     |                                                                                                                                                                                                              |                  |
|--------------------------|-----|--------------------------------------------------------------------------------------------------------------------------------------------------------------------------------------------------------------|------------------|
| Participants             | 13* | (a) Report numbers of individuals at each stage of study—eg numbers potentially eligible, examined for eligibility, confirmed eligible, included in the study, completing follow-up, and analysed            | 9-10             |
|                          |     | (b) Give reasons for non-participation at each stage                                                                                                                                                         | N/A              |
|                          |     | (c) Consider use of a flow diagram                                                                                                                                                                           | N/A              |
| Descriptive data         | 14* | (a) Give characteristics of study participants (eg demographic, clinical, social) and information on exposures and potential confounders                                                                     | 9-10             |
|                          |     | (b) Indicate number of participants with missing data for each variable of interest                                                                                                                          | Table 1-3        |
| Outcome data             | 15* | Report numbers of outcome events or summary measures                                                                                                                                                         | 10-13            |
| Main results             | 16  | (a) Give unadjusted estimates and, if applicable, confounder-adjusted estimates and their precision (eg, 95% confidence interval). Make clear which confounders were adjusted for and why they were included | 10-13            |
|                          |     | (b) Report category boundaries when continuous variables were categorized                                                                                                                                    | N/A              |
|                          |     | (c) If relevant, consider translating estimates of relative risk into absolute risk for a meaningful time period                                                                                             | N/A              |
| Other analyses           | 17  | Report other analyses done—eg analyses of subgroups and interactions, and sensitivity analyses                                                                                                               | 10-13            |
| <b>Discussion</b>        |     |                                                                                                                                                                                                              |                  |
| Key results              | 18  | Summarise key results with reference to study objectives                                                                                                                                                     | 14               |
| Limitations              | 19  | Discuss limitations of the study, taking into account sources of potential bias or imprecision. Discuss both direction and magnitude of any potential bias                                                   | 16               |
| Interpretation           | 20  | Give a cautious overall interpretation of results considering objectives, limitations, multiplicity of analyses, results from similar studies, and other relevant evidence                                   | 15-17            |
| Generalisability         | 21  | Discuss the generalisability (external validity) of the study results                                                                                                                                        | 16               |
| <b>Other information</b> |     |                                                                                                                                                                                                              |                  |
| Funding                  | 22  | Give the source of funding and the role of the funders for the present study and, if applicable, for the original study on which the present article is based                                                | N/A – No funding |

\*Give information separately for cases and controls in case-control studies and, if applicable, for exposed and unexposed groups in cohort and cross-sectional studies.

**Note:** An Explanation and Elaboration article discusses each checklist item and gives methodological background and published examples of transparent reporting. The STROBE checklist is best used in conjunction with this article (freely available on the Web sites of PLoS Medicine at <http://www.plosmedicine.org/>, Annals of Internal Medicine at <http://www.annals.org/>, and Epidemiology at <http://www.epidem.com/>). Information on the STROBE Initiative is available at [www.strobe-statement.org](http://www.strobe-statement.org).

# BMJ Open

## Understanding Patient Preference for Physician Attire: A Cross-Sectional Observational Study of Ten Academic Medical Centers in the United States

|                                 |                                                                                                                                                                                                                                                                                                                                                                                                                                                                                                                                                                                                                                                            |
|---------------------------------|------------------------------------------------------------------------------------------------------------------------------------------------------------------------------------------------------------------------------------------------------------------------------------------------------------------------------------------------------------------------------------------------------------------------------------------------------------------------------------------------------------------------------------------------------------------------------------------------------------------------------------------------------------|
| Journal:                        | <i>BMJ Open</i>                                                                                                                                                                                                                                                                                                                                                                                                                                                                                                                                                                                                                                            |
| Manuscript ID                   | bmjopen-2017-021239.R1                                                                                                                                                                                                                                                                                                                                                                                                                                                                                                                                                                                                                                     |
| Article Type:                   | Research                                                                                                                                                                                                                                                                                                                                                                                                                                                                                                                                                                                                                                                   |
| Date Submitted by the Author:   | 06-Mar-2018                                                                                                                                                                                                                                                                                                                                                                                                                                                                                                                                                                                                                                                |
| Complete List of Authors:       | Petrilli, Christopher; University of Michigan, Internal Medicine Saint, Sanjay; Veterans Affairs Ann Arbor Healthcare System, Internal Medicine; University of Michigan, Internal Medicine<br>Jennings, Joseph; Georgetown University School of Medicine, Internal Medicine<br>Caruso, Andrew; Baylor College of Medicine, Internal Medicine<br>Kuhn, Latoya; University of Michigan, Internal Medicine; Veterans Affairs Ann Arbor Healthcare System, Internal Medicine<br>Snyder, Ashley; University of Michigan, Internal Medicine<br>Chopra, Vineet; University of Michigan, Medicine; Veterans Affairs Ann Arbor Healthcare System, Internal Medicine |
| <b>Primary Subject Heading</b>: | Patient-centred medicine                                                                                                                                                                                                                                                                                                                                                                                                                                                                                                                                                                                                                                   |
| Secondary Subject Heading:      | Health policy, Communication, Sociology                                                                                                                                                                                                                                                                                                                                                                                                                                                                                                                                                                                                                    |
| Keywords:                       | Health policy < HEALTH SERVICES ADMINISTRATION & MANAGEMENT, Protocols & guidelines < HEALTH SERVICES ADMINISTRATION & MANAGEMENT, Quality in health care < HEALTH SERVICES ADMINISTRATION & MANAGEMENT, Infection control < INFECTIOUS DISEASES, PUBLIC HEALTH, QUALITATIVE RESEARCH                                                                                                                                                                                                                                                                                                                                                                      |
|                                 |                                                                                                                                                                                                                                                                                                                                                                                                                                                                                                                                                                                                                                                            |

SCHOLARONE™  
Manuscripts

1  
2  
3                   **Understanding Patient Preference for Physician Attire: A Cross-Sectional**  
4  
5                   **Observational Study of Ten Academic Medical Centers in the United States**  
6  
7

8  
9 Christopher M. Petrilli, MD (1, 2)

10  
11 Sanjay Saint, MD, MPH (2, 1)

12  
13 Joseph J. Jennings, MD (3)

14  
15 Andrew Caruso, MD (4)

16  
17 Latoya Kuhn, MPH (2, 1)

18  
19 Ashley Snyder, MPH (1)

20  
21 Vineet Chopra, MD, MSc (1, 2)

22  
23  
24  
25  
26 **From:** (1) Division of Hospital Medicine, Department of Medicine, University of Michigan  
27  
28 Medical School; (2) VA Ann Arbor Healthcare System both in Ann Arbor, MI. (3) Division  
29  
30 of Gastroenterology, Department of Medicine, Georgetown University School of  
31  
32 Medicine, Washington, DC (4) Division of General Internal Medicine, Department of  
33  
34 Medicine, Baylor College of Medicine, Houston, TX  
35  
36  
37

38  
39 **Abstract word count: 289**

40  
41 **Manuscript Word Count:** 3480, excluding abstract, references, tables and figures

42  
43 **Funding:** There was no funding source of for this study.

44  
45 **Corresponding Author:**

46  
47 Vineet Chopra, MD, MSc

48  
49 2800 Plymouth Road, Building 16 #432W

50  
51 Ann Arbor, MI 48109

52  
53 vineetc@med.umich.edu

1  
2  
3 **Conflicts of Interest:** No Authors Report Any Conflicts of Interest Related to This  
4  
5 Study.  
6  
7  
8  
9

10 **Acknowledgements:** The authors thank Dr. Rachel Thompson, Dr. Rajesh Patel, Dr.  
11 Gabrielle Berger, Dr. Daniel Cabrera, Dr. Nancy Dawson, Dr. Talawnda Bragg,  
12 Stephanie Yuen, Scarlett Shader, Anaiah Massey and Sabian Taylor for their  
13 assistance with data collection at their respective sites. Additionally, the authors thank  
14 Angie Fagerlin, PhD and Brian Zikmund-Fisher, PhD for their assistance with survey  
15 instrument design.  
16  
17  
18  
19  
20  
21  
22  
23  
24  
25

26 **Conception of the work:** Chopra, Petrilli, Saint  
27

28 **Design of the work:** Chopra, Fagerlin, Petrilli, Saint, Zikmund-Fisher  
29

30 **Acquisition of the data:** Berger, Bragg, Cabrera, Caruso, Chopra, Jennings, Kuhn,  
31 Massey, Patel, Petrilli, Saint, Shader, Snyder, Taylor, Thompson, Yuen  
32  
33  
34

35 **Analysis and interpretation of the data:** AC, VC, JJ, LK, CP, SS, AS  
36

37 **Drafting and critical revision of the manuscript for important intellectual**  
38 **content:** AC, VC, JJ, LK, CP, SS, AS  
39  
40  
41

42 **Accountable for all aspects of the work and approval of the final manuscript:** AC,  
43 VC, JJ, LK, CP, SS, AS  
44  
45  
46  
47  
48

49 **Data Sharing Statement:** Additional unpublished data are not publicly available.  
50  
51  
52  
53  
54  
55  
56  
57  
58  
59  
60

1  
2  
3 **OBJECTIVE:** Several large studies have shown that improving the patient experience is  
4 associated with higher reported patient satisfaction, increased adherence to treatment  
5 and clinical outcomes. Whether physician attire can affect the patient experience—and  
6 how this influences satisfaction— is unknown. Therefore, we performed a national,  
7 cross-sectional study to examine patient perceptions, expectations and preferences  
8 regarding physicians dress.  
9

10  
11  
12  
13  
14  
15  
16  
17  
18  
19 **SETTING:** Ten academic hospitals in the United States.  
20

21  
22  
23  
24 **PARTICIPANTS:** Convenience sample of 4,062 patients recruited from June 1, 2015 to  
25 October 31, 2016.  
26  
27

28  
29  
30  
31 **PRIMARY AND SECONDARY OUTCOMES MEASURED:** We conducted a questionnaire-based  
32 study of patients across ten academic hospitals in the United States. The questionnaire  
33 included photographs of a male and female physician dressed in seven different forms  
34 of attire. Patients were asked to rate the provider pictured in various clinical settings.  
35 Preference for attire was calculated as the composite of responses across five domains  
36 (knowledgeable, trustworthy, caring, approachable, and comfortable) via a standardized  
37 instrument. Secondary outcome measures included variation in preferences by  
38 respondent characteristics (e.g., gender), context of care (e.g., inpatient vs. outpatient)  
39 and geographic region.  
40  
41  
42  
43  
44  
45  
46  
47  
48  
49  
50  
51  
52  
53  
54  
55  
56  
57  
58  
59  
60



1  
2  
3 **RESULTS:** Of 4,062 patient responses, 53% indicated that physician attire was important  
4 to them during care. Over one third agreed that it influenced their satisfaction with care.  
5  
6 Compared to all other forms of attire, formal attire with a white coat was most highly  
7  
8 rated ( $p=0.001$  vs. scrubs with white coat;  $p<0.001$  all other comparisons). Important  
9  
10 differences in preferences for attire by clinical context and respondent characteristics  
11  
12 were noted. For example, respondents  $\geq 65$  years preferred formal attire with white  
13  
14 coats ( $p<0.001$ ) while scrubs were most preferred for surgeons.  
15  
16  
17  
18  
19  
20

21 **CONCLUSIONS:** Patients have important expectations and perceptions for physician dress  
22  
23 that vary by context, and region. Nuanced policies addressing physician dress code to  
24  
25 improve patient satisfaction appear important.  
26  
27  
28  
29  
30

31 **TRIAL REGISTRATION:** Observational study, not registered  
32  
33  
34  
35  
36  
37  
38  
39  
40  
41  
42  
43  
44  
45  
46  
47  
48  
49  
50  
51  
52  
53  
54  
55  
56  
57  
58  
59  
60

### STRENGTHS AND LIMITATIONS OF THIS STUDY

- This is the largest study to date that examines patient preferences for physician attire.
- The study design and survey instrument were carefully designed to limit biases associated with physician images.
- Our findings show that patients appear to care about attire and may expect to see their doctor dress in a certain way, which has policy implications for institutional dress codes.
- The providers pictured in our survey instrument were young, slender, and Caucasian, which may limit generalizability of findings.
- While soliciting patient responses while hospitalized helps generate validity, it is possible that reported impressions may not reflect actual preferences.

## INTRODUCTION

At its core, the practice of medicine hinges on the patient-physician relationship. From initial introductions, physicians work to build rapport to foster a partnership to provide patient-centered care, defined as that which is: “respectful of, and responsive to, individual patient preferences, needs and values.”<sup>1</sup> Not surprisingly, medical school curricula often include courses aimed at improving the patient experience.<sup>2</sup> Similarly, since 2007, the Centers for Medicare and Medicaid have required hospitals to collect, submit and publicly report the results of the Hospital Consumer Assessment of Healthcare Providers and Systems (HCAHPS) survey or risk financial penalties.<sup>3</sup> These data are also important because they have been linked to clinical outcomes. For example, a positive correlation between patient satisfaction, improved mortality and reduced 30-day readmissions have been reported.<sup>4-8</sup>

Although improving the patient experience, and consequently satisfaction, is an important target for many hospitals, how best to do this is unclear. One approach is to understand how physician attire influences the patient experience and develop guidelines based on patients’ preferences. Indeed, some healthcare systems across the country have adopted stringent dress codes. In a recently published article, we contacted human resource professionals and administrators at top US News & World Report Hospitals,<sup>9</sup> and found that five had written guidelines endorsing formal and professional attire. Yet patient preferences for physician attire are not straightforward. In a systematic review, we found that while patients preferred formal attire and white coats overall, attire such as scrubs or casual dress were preferred in specific settings.<sup>9</sup> These findings make intuitive sense: patients often have notions of how a “professional” should

1  
2  
3 dress and are more likely to respond positively to those that meet these stereotypes.  
4  
5 Strategies targeting physician dress may therefore enhance trust and satisfaction.  
6

7  
8 Therefore, we performed a cross-sectional survey of patients receiving care  
9  
10 across the US using a standardized questionnaire to better understand the impact of  
11  
12 physician attire across different clinical settings (e.g., hospitalized vs. ambulatory clinic  
13  
14 visits). In addition, we aimed to analyze a larger sample of patients from multiple health  
15  
16 systems than has been previously reported in the literature.  
17  
18  
19  
20

## 21 **METHODS**

### 22 *Study design and population*

23  
24  
25  
26 Between June 1, 2015 to October 31, 2016, a total of 6,280 surveys  
27  
28 were provided to ten academic medical centers in the United States (US) of  
29  
30 which 4,062 surveys were filled and available for analyses (response rate = 65%). The  
31  
32 participating sites spanned four main geographic regions of the US. The questionnaire  
33  
34 consisted of 22 questions and included photographs of a male and a female physician  
35  
36 in various forms of attire. The questionnaire was administered to adult patients that  
37  
38 were receiving care in clinics (outpatients) or admitted to the hospital (inpatients).  
39  
40 Outpatients were approached in waiting rooms of general medicine and medical  
41  
42 subspecialty clinics, while inpatients were approached in their hospital rooms when  
43  
44 admitted to non-surgical units. At all sites, the questionnaire was administered by  
45  
46 research staff using paper instruments. The surveys were administered during normal  
47  
48 business hours at times convenient to each sites' research staff. Respondents were  
49  
50 allowed to request help filling out the form from any visitor accompanying them. The  
51  
52  
53  
54  
55  
56  
57  
58  
59  
60

1  
2  
3 research staff delivered the paper instrument and returned approximately 5-10 minutes  
4  
5 later to pick-up the completed form. Respondents provided verbal consent. No  
6  
7 identifying information was collected from those that completed the study.  
8  
9

### 10 11 12 *Sample size calculation* 13

14  
15 It was assumed that responses between two attire forms would be normally  
16  
17 distributed on the 1-10 scale between attire types. An estimated standard deviation of  
18  
19 2.2 was used. If our study included at least 816 patients, (assuming a two-sided alpha  
20  
21 error of 0.05), we expected to have 90% power to detect differences for effect sizes of  
22  
23 0.50 on the 1-10 scale. Fewer subjects would be needed if the standard deviation were  
24  
25 smaller.  
26  
27

### 28 29 30 31 *Patient and Public Involvement* 32

33  
34 The study was designed to understand patient experience and preferences.  
35  
36 However, patients were not included in the design of the survey instrument, recruitment,  
37  
38 or conduct of the study. Patients who participated did so anonymously, and therefore  
39  
40 the study team will be unable to disseminate the results to study participants.  
41  
42  
43  
44  
45  
46

### 47 48 *Study design and data collection* 49

50  
51 The questionnaire was developed from a systematic review that examined the  
52  
53 role of physician attire on patient preferences and satisfaction.<sup>9</sup> A multidisciplinary team  
54  
55 of psychometricians, research scientists, choice architects, survey experts, and  
56  
57  
58  
59  
60

1  
2  
3 bioethicists developed the study instrument. Each question sought to elicit preferences  
4 regarding various forms of physician attire, including: casual, casual with white coat,  
5 scrubs, scrubs with white coat, formal, formal with white coat, and business suit (**Figure**  
6  
7  
8 **1**). Photographs of the same Caucasian male and female physician donning such attire  
9  
10 were taken by a professional photographer with strict attention to facial expressions,  
11  
12 pose, lighting, and other non-verbal cues as these may influence preference or likability.  
13  
14

15  
16 To avoid bias, 14 different versions of the study instrument were created, and  
17  
18 distribution of the questionnaires was randomized to participants. In each version, the  
19  
20 gender and attire of the first physician model varied to prevent ordering, priming or  
21  
22 anchoring effects (**Supplementary File**). The questionnaire had four sections: in the  
23  
24 first section, respondents were asked to rate the physician depicted across five domains  
25  
26 including knowledge, trust, care, approachability, and comfort. In the second section,  
27  
28 respondents were presented with seven photographs of the same physician wearing  
29  
30 different attire and asked to select their preference in various clinical settings. The third  
31  
32 and fourth sections sought respondents' general opinions regarding physician attire,  
33  
34 demographic data and frequency of interactions with physicians.  
35  
36  
37  
38  
39

40 Before administration, the survey instrument was pilot-tested with a convenience  
41  
42 sample of patients at the lead site to ensure photographs, questions, ratings, and  
43  
44 randomly generated order of the 14 surveys at each site would functioned as desired.  
45  
46  
47  
48

### 49 *Measurements*

50  
51 Ratings regarding how knowledgeable, trustworthy, caring, and approachable  
52  
53 each physician appeared, as well as how comfortable the physician made the  
54  
55  
56  
57  
58  
59  
60

1  
2  
3 respondent feel, were measured using a 1-10 scale, where 1 indicated “somewhat  
4 preferred” vs. 10 “extremely preferred.” Preference of attire within specific care settings  
5 (e.g., primary care, emergency room, hospital, surgery, and overall) was assessed  
6 using photos for each of the 7 attire categories. Respondent opinions regarding  
7 importance of dress and white coats were collected using a 1-5 Likert scale, where 1  
8 indicated “strongly disagree” and 5 indicated “strongly agree.” We assessed patient  
9 satisfaction based on agreement with two questions: “How my doctor dresses is  
10 important to me,” and “How my doctor dresses influences how happy I am with the care  
11 received.” For analyses, responses were trichotomized as follows: agreement =  
12 strongly agree and agree; neither agree nor disagree; and disagreement = disagree or  
13 strongly disagree. Demographics including age, gender, education level, race, and  
14 number of physician encounters were collected. Preferences for attire and  
15 demographics were dichotomized for bivariate comparison. Questions that were  
16 unanswered or where more than one response was entered were excluded.  
17  
18  
19  
20  
21  
22  
23  
24  
25  
26  
27  
28  
29  
30  
31  
32  
33  
34  
35  
36  
37

### 38 *Outcomes*

39  
40 The primary outcome of interest – preference for attire -- was calculated as the  
41 composite average of the five individual rating domains (knowledgeable, trustworthy,  
42 caring, approachable, and comfortable). Additionally, variation in preferences for  
43 physician attire by respondent characteristics (e.g., gender, age), context of care (e.g.,  
44 inpatient vs. outpatient) and geographical region (e.g., Northeast, Midwest, South, and  
45 West) were also assessed.  
46  
47  
48  
49  
50  
51  
52  
53  
54  
55  
56  
57  
58  
59  
60

### *Statistical analyses*

Data from paper questionnaires were entered independently and in duplicate. Since respondents were not required to answer all questions, the denominator for individual questions (and associated response rate) varied. Descriptive statistics (means, percentage) and standard deviation (SD) were initially used to tabulate results. Differences in the mean composite rating scores from the physician ratings section were assessed using one-way ANOVA. To reduce the potential for Type I error, post-estimation pairwise comparisons were performed using the Tukey-Kramer method.<sup>2</sup> Differences in proportions for categorical data were compared using the Z-test. Bivariate comparisons between respondent age, gender, and level of education and corresponding respondent preferences for attire were assessed using Chi-squared tests. A two-sided p-value of less than 0.05 was considered statistically significant. All analyses were performed using Stata 14 MP/SE (StataCorp, College Station, TX).

### *Ethical and Regulatory Oversight*

The study was reviewed and deemed exempt from regulation by the University of Michigan Institutional Review Board (HUM00085305).

## **RESULTS**

A total of 4,062 questionnaires were completed by patients across ten academic medical centers in the United States. Respondents represented all parts of the United States including the Northeast, Midwest, South and West. Most patients were surveyed while admitted to the hospital (n=2,616 [64%]); however, a substantial proportion of



1  
2  
3 outpatients were also included (n=1,446 [36%]). Respondents were most often white  
4 (71%) and male (65%). The plurality of patients was 65 years of age or older (36%).  
5  
6  
7 Seventy percent of those surveyed indicated having attended some college or having  
8 college degrees. With respect to interactions with the health system, 38% of  
9  
10 respondents reported having seen 6 or more physicians in the past year (**Table 1**).  
11  
12  
13  
14  
15  
16

### 17 *Ratings of Physician Attire*

18  
19 Respondents rated formal attire with white coat for both male and female  
20 physician models as the most preferred form of dress compared to other forms of attire  
21 with a mean composite score of 8.1 (SD 1.8) [all pairwise comparisons  $p < 0.001$ ].  
22  
23 Cronbach's alpha for the 5-items included in the composite score was 0.96.. Ratings for  
24 formal attire with white coat were greatest across all domains including how  
25 knowledgeable, trustworthy, caring, and approachable the physician appeared as well  
26 as how comfortable the physician made the respondent feel. Moreover, these findings  
27 were significant in the domains of trustworthiness, caring and how comfortable the  
28 physician made the respondent feel in all pairwise comparison testing to other forms of  
29 attire ( $p < 0.05$ ). For the rating of approachability, formal attire with a white coat was not  
30 statistically different from scrubs with a white coat or formal without a white coat in  
31 pairwise comparison. Scrubs with white coat ranked second overall, with a mean  
32 composite score of 7.6 (SD=1.9) followed by formal attire without a white coat with a  
33 mean composite score of 7.5 (SD=2.0) (**Figure 2**).  
34  
35  
36  
37  
38  
39  
40  
41  
42  
43  
44  
45  
46  
47  
48  
49  
50  
51  
52  
53  
54  
55  
56  
57  
58  
59  
60

### *Preferences for Physician Attire by Care Settings*

When examining preferences for physician attire by care setting, important differences emerged. Formal attire with white coat was preferred by respondents for their primary care (44%) and hospital physician (39%). Conversely, scrubs were rated highest for emergency room physicians (40%) and surgeons (42%). In both emergency and surgery settings, scrubs alone were followed in preference by scrubs with white coats (34% and 23%, respectively). When asked, "Overall, which clothes do you feel that your doctor should wear?" most respondents preferred formal attire with white coat (44%) followed by scrubs with white coat (26%) (**Table 2**). Excluding surgeons, respondents universally preferred physicians in white coats over no white coats. When evaluating surgeons, respondents indicated no preference for a white coat on female physicians ( $p=0.85$ ), but preferred male physicians without white coats ( $p<0.001$ ). No differences in preference by physician gender in other clinical care settings were noted (**Figure 3**).

### *Perceived Influence on Satisfaction, Importance and Appropriateness of Physician Attire*

More than half (53%) of the patients surveyed agreed with the statement that how their doctor dresses was important to them, while 36% of respondents agreed with the statement that physician attire influenced how happy they were with the care they received. Views regarding appropriateness of casual attire when physicians see patients on the weekends were mixed: 44% of respondents stated this was appropriate while 56% were either neutral or disagreed with the practice.

1  
2  
3 Specific questions regarding when physicians should don a white coat elicited  
4 various preferences. Most respondents (55%) indicated that they agreed or strongly  
5 agreed with the statement that doctors should wear a white coat when seeing patients  
6 in the office. In the emergency room, however, 44% agreed with the statement that  
7 physicians should wear a white coat when seeing patients vs. 56% that indicated either  
8 no preference (38%) or disagreement (18%). When asked whether doctors should wear  
9 a white coat when seeing patients in the hospital, the majority of respondents (62%)  
10 agreed or strongly agreed with this statement (**Table 3**).

### 21 22 23 *Variations in Patient Preferences of Physician Attire*

24  
25 Important variations in patient preferences for attire were noted. For example,  
26 female respondents more often preferred scrubs with white coats in emergency room  
27 and hospital settings than males (41% vs. 31% [ $p<0.001$ ] and 32% vs. 27% [ $p=0.001$ ],  
28 respectively). However, both genders indicated formal attire with white coat was overall  
29 most preferred (43% and 44%, respectively). In hospital settings, respondents 65 years  
30 of age or older frequently preferred formal attire with white coats than younger patients  
31 (44% vs. 36%,  $p<0.001$ ). Conversely, younger patients more often preferred scrubs and  
32 white coats than formal attire overall (28% vs. 21%,  $p<0.001$ ). Some differences in  
33 preferences regarding physician dress based on respondent education level were also  
34 noted. Specifically, respondents with a college degree preferred formal and white coat  
35 for their primary care provider more often than those without a college degree (48% vs.  
36 42%,  $p<0.001$ ).

1  
2  
3 No differences in preferences between those with three or more physician visits  
4 in the preceding year vs. those with less frequent visits were noted. Similarly,  
5 preferences for attire did not vary by setting in which respondents were polled, although  
6 respondents in the outpatient setting more often preferred doctors in the hospital to  
7 wear scrubs and a white coat compared to hospitalized respondents (32% vs. 27%,  
8  $p=0.002$ ). However, preferences for attire did vary by geographic region. For example,  
9 while formal attire and white coats were preferred across all regions, 50% of  
10 respondents in the West and 51% in the South selected this as their preferred option  
11 compared to 38% and 40% in the Northeast and Midwest, respectively. Conversely,  
12 over half of all respondents in the Northeast selected scrubs as their preferred attire for  
13 surgeons compared to a quarter of respondents in the South (54% vs. 25%,  $p<0.001$ ).  
14  
15  
16  
17  
18  
19  
20  
21  
22  
23  
24  
25  
26  
27  
28  
29

## 30 **DISCUSSION**

31  
32  
33 This study of over 4,000 patients receiving medical care in diverse academic  
34 medical centers is the largest to report preferences regarding physician attire in the US.  
35 Over half of the participants indicated that how a physician dresses was important to  
36 them, with over one in three stating that this influenced how happy they were with care  
37 received. Overall, respondents indicated that formal attire with white coats was the most  
38 preferred form of physician dress. However, in settings such as surgery or emergency  
39 rooms, scrubs with white coats were most preferred. Although variation in preferences  
40 by respondent age, gender, education and geography were noted, these findings  
41 indicate that not only do most patients have expectations regarding doctor attire, but  
42 that a “professional” look matters most. Given the size, methodological rigor and  
43  
44  
45  
46  
47  
48  
49  
50  
51  
52  
53  
54  
55  
56  
57  
58  
59  
60

1  
2  
3 representativeness of these data, policies addressing physician attire should be  
4  
5 considered to improve patient satisfaction.  
6  
7

8 Previous studies have shown that patients harbor conscious and unconscious  
9  
10 biases when it comes to provider dress.<sup>10 11</sup> Thus, our finding that patients have specific  
11  
12 preferences regarding physician attire was not surprising. What this study highlights,  
13  
14 however, is the potential importance of physician attire to the physician-patient  
15  
16 relationship. Indeed, specific clinical and contextual aspects appear to influence a  
17  
18 patient's preconceived notion of 'professional attire'. For instance, we found that the  
19  
20 locale where care is delivered (e.g., hospital vs. clinic) as well as context of care (e.g.,  
21  
22 emergency room or surgery) affected preferences. Similarly, we observed that certain  
23  
24 respondent characteristics such as age, gender, and education also influenced their  
25  
26 preferences. These findings can potentially be used to improve the patient experience.  
27  
28 For instance, providers engaged in care of elderly patients (e.g., geriatric clinics,  
29  
30 hospital settings or extended-care facilities) may consider donning formal attire more so  
31  
32 than surgeons or emergency room physicians where scrubs may be more important.  
33  
34 Similarly, hospitals in southern regions of the US may wish to endorse formal attire and  
35  
36 white coats as their preferred policy. For providers in the emergency room and surgical  
37  
38 arenas, such attire may in fact be viewed as out of place – and thus different rules might  
39  
40 be necessary. These examples illustrate how policies for specific doctors, settings or  
41  
42 patients can be leveraged to focus on patient-centered care.  
43  
44  
45  
46  
47  
48

49 How should one interpret these findings given concerns for infection transmission  
50  
51 associated with physician dress? Previous studies have shown that bacteria and  
52  
53 pathogens can be isolated from white coats, neckties and sleeves of medical  
54  
55  
56  
57  
58  
59  
60

1  
2  
3 providers.<sup>12-20</sup> These studies are one of the reasons why a “bare below the elbows”  
4  
5 (BBE) policy exists in some countries. While we did not specifically ask respondents to  
6  
7 consider this risk when choosing attire preferences, three aspects deserve discussion.  
8  
9  
10 First, despite the abundance of literature on infection prevention, we are unaware of any  
11  
12 study that links physician dress to source or transmission of infection. Rather, one study  
13  
14 randomly sampled physicians’ fingertips and reported no association between BBE-  
15  
16 compliant versus non-compliant attire and presence of bacterial colony-forming units or  
17  
18 clinically significant organisms.<sup>21</sup> Second, evidence suggests that other practices (e.g.,  
19  
20 hand hygiene) may be more relevant than physician dress in preventing infection. In an  
21  
22 institution-wide study at Vanderbilt University Medical Center, direct observation  
23  
24 combined with financial incentives for appropriate hand hygiene increased compliance  
25  
26 with hand hygiene policies and decreased device-associated standardized infection  
27  
28 ratios.<sup>22</sup> Conversely, wearing a white coat has been associated with increased selective  
29  
30 and sustained attentiveness to tasks.<sup>23</sup> These findings suggest that clothing may  
31  
32 influence the wearer’s own psychological processes, a phenomenon coined “enclothed  
33  
34 cognition.”<sup>24</sup> Therefore, attentiveness to hand hygiene may, in fact, be increased when  
35  
36 physicians wear white coats or formal attire – improving patient care and satisfaction.<sup>25</sup>  
37  
38  
39  
40  
41  
42  
43  
44  
45  
46  
47  
48  
49  
50  
51  
52  
53  
54  
55  
56  
57  
58  
59  
60  
26  
26 Third, we add to the growing body of evidence that suggests patients have important  
preferences regarding attire.<sup>9 10 27-47</sup> As further demonstrated by a recent study, these  
preferences may evolve over time, as demonstrated by variation in preferences by  
respondent age.<sup>48</sup> Physician attire may offer an important modifiable variable in the  
doctor-patient relationship that could improve patient experience and satisfaction and  
ultimately produce better outcomes.<sup>49-51</sup>

1  
2  
3 Our study has limitations. First, as with other studies of physician attire, we  
4 showed respondents pictures of providers and elicited preferences via a paper  
5 questionnaire. Our providers were young, slender, Caucasian and all cared for in  
6 academic settings, which may have introduced bias into responses. Similarly, we did  
7 not record information for patients who refused to participate in the study, also  
8 potentially introducing bias. Second, while approaching patients as they were receiving  
9 care helps generate validity, it is possible that reported impressions may not reflect  
10 actual preferences on attire but rather current feelings related to their care. Prior studies  
11 have shown that the impact of attire on patient satisfaction has to be considered in the  
12 context of the behaviors and attitude of the physician during the encounter. The survey  
13 did not have questions to capture the other dynamics of the doctor-patient relationship,  
14 which may help further explicate responses.<sup>9</sup> Third, we asked patients to report  
15 preferences via Likert scales and predefined categories. Although this allows for a  
16 range of answers (including a neither agree or disagree option), such categorizations  
17 may force respondents to answer in ways that do not capture their true feelings. Fourth,  
18 while the proportion of Caucasian respondents were similar to 2010 Census data  
19 estimates, a lower than expected number of Hispanic respondents (5% compared with  
20 16% estimated by the Census data) participated.<sup>52</sup> Thus, whether our findings will hold  
21 true across race or ethnicity is not known. Finally, we did not include questions  
22 regarding infection transmission given the lack of evidence supporting the notion that  
23 white coats or attire is associated with infections.

24  
25 Our study also has important strengths. First, this is the largest study to examine  
26 patient preferences for physician attire. Given methodological strengths including  
27  
28  
29  
30  
31  
32  
33  
34  
35  
36  
37  
38  
39  
40  
41  
42  
43  
44  
45  
46  
47  
48  
49  
50  
51  
52  
53  
54  
55  
56  
57  
58  
59  
60

1  
2  
3 randomization of instrument sequence, as well as inclusion of diverse regions and  
4  
5 patient populations, our findings clarify possible dress codes in various healthcare  
6  
7 settings. Second, in contrast to other studies, we specifically designed our study and  
8  
9 survey instrument to avoid biases associated with images. For example, we hired a  
10  
11 professional photographer and studio to ensure photographs of physicians were  
12  
13 otherwise identical. Similarly we also used models of the same race (Caucasian) with  
14  
15 identical postures and facial expressions so as to limit confounding associated with  
16  
17 models of different backgrounds or appearance as has occurred in previous studies.<sup>29 36</sup>  
18  
19  
20  
21 <sup>37 39 45</sup> Additionally, we implemented strategies during survey collection such as  
22  
23 randomizing order of delivery and images to minimize bias. These approaches help lend  
24  
25 a high degree of internal validity to our findings. Third, our findings have policy  
26  
27 implications: namely, patients appear to care about attire and may expect to see their  
28  
29 doctor in certain ways. Hospitals, clinics, emergency departments and ambulatory  
30  
31 surgical centers should consider using these data to set dress codes for physicians  
32  
33 providing care in these settings.  
34  
35  
36

37  
38 In summary, while physician attire cannot replace excellent clinical care, our data  
39  
40 suggest that it may impact how patients perceive care and perhaps how willing they are  
41  
42 to trust their doctors. In an era of patient-centeredness and patient satisfaction,  
43  
44 physician attire may be an important, modifiable component of patient care. As  
45  
46 perceptions and expectations regarding physician dress by patients, context, and region  
47  
48 exist, nuanced policies that target such factors appear relevant. Future studies  
49  
50 implementing such policies in both hospital, clinic and emergency room settings appear  
51  
52 necessary.  
53  
54  
55  
56  
57  
58  
59  
60



1  
2  
3  
4  
5  
6  
7  
8  
9  
10  
11  
12  
13  
14  
15  
16  
17  
18  
19  
20  
21  
22  
23  
24  
25  
26  
27  
28  
29  
30  
31  
32  
33  
34  
35  
36  
37  
38  
39  
40  
41  
42  
43  
44  
45  
46  
47  
48  
49  
50  
51  
52  
53  
54  
55  
56  
57  
58  
59  
60

For peer review only

## References

1. Institute of Medicine. *Crossing the Quality Chasm: A New Health System for the 21st Century*. Washington, DC: National Academy Press 2001:6.
2. Parent K, Jones K, Phillips L, et al. Teaching Patient- and Family-Centered Care: Integrating Shared Humanity into Medical Education Curricula. *AMA J Ethics* 2016;18(1):24-32. doi: 10.1001/journalofethics.2016.18.1.medu1-1601
3. Services TCMaM. The HCAHPS Survey - Frequently Asked Questions [Available from: <https://www.cms.gov/Medicare/Quality-Initiatives-Patient-Assessment-Instruments/HospitalQualityInits/Downloads/HospitalHCAHPSFactSheet201007.pdf> accessed 4/28/2017 2017.
4. Manary MP, Boulding W, Staelin R, et al. The patient experience and health outcomes. *N Engl J Med* 2013;368(3):201-3. doi: 10.1056/NEJMp1211775
5. Boulding W, Glickman SW, Manary MP, et al. Relationship between patient satisfaction with inpatient care and hospital readmission within 30 days. *Am J Manag Care* 2011;17(1):41-8.
6. Jha AK, Orav EJ, Zheng J, et al. Patients' perception of hospital care in the United States. *N Engl J Med* 2008;359(18):1921-31. doi: 10.1056/NEJMsa0804116
7. Barbosa CD, Balp MM, Kulich K, et al. A literature review to explore the link between treatment satisfaction and adherence, compliance, and persistence. *Patient Prefer Adher* 2012;6:39-48. doi: Doi 10.2147/Ppa.S24752
8. O'Malley AS, Forrest CB, Mandelblatt J. Adherence of low-income women to cancer screening recommendations. *J Gen Intern Med* 2002;17(2):144-54.

- 1  
2  
3 9. Petrilli CM, Mack M, Petrilli JJ, et al. Understanding the role of physician attire on  
4  
5 patient perceptions: a systematic review of the literature--targeting attire to  
6  
7 improve likelihood of rapport (TAILOR) investigators. *BMJ Open*  
8  
9 2015;5(1):e006578. doi: 10.1136/bmjopen-2014-006578  
10  
11
- 12 10. Rehman SU, Nietert PJ, Cope DW, et al. What to wear today? Effect of doctor's  
13  
14 attire on the trust and confidence of patients. *Am J Med* 2005;118(11):1279-86.  
15  
16
- 17 11. Beach MC, Fitzgerald A, Saha S. White coat hype: branding physicians with  
18  
19 professional attire. *JAMA Intern Med* 2013;173(6):467-8. doi:  
20  
21 10.1001/jamainternmed.2013.3766  
22  
23
- 24 12. Bearman G, Bryant K, Leekha S, et al. Healthcare personnel attire in non-operating-  
25  
26 room settings. *Infect Control Hosp Epidemiol* 2014;35(2):107-21. doi:  
27  
28 10.1086/675066  
29  
30
- 31 13. Ditchburn I. Should doctors wear ties? *J Hosp Infect* 2006;63(2):227-8. doi:  
32  
33 10.1016/j.jhin.2006.01.027  
34  
35
- 36 14. Munoz-Price LS, Arheart KL, Mills JP, et al. Associations between bacterial  
37  
38 contamination of health care workers' hands and contamination of white coats  
39  
40 and scrubs. *Am J Infect Control* 2012;40(9):e245-8. doi:  
41  
42 10.1016/j.ajic.2012.03.032  
43  
44
- 45 15. Gaspard P, Eschbach E, Gunther D, et al. Meticillin-resistant *Staphylococcus*  
46  
47 *aureus* contamination of healthcare workers' uniforms in long-term care facilities.  
48  
49 *J Hosp Infect* 2009;71(2):170-5. doi: 10.1016/j.jhin.2008.10.028  
50  
51
- 52 16. Loh W, Ng VV, Holton J. Bacterial flora on the white coats of medical students. *J*  
53  
54 *Hosp Infect* 2000;45(1):65-8. doi: 10.1053/jhin.1999.0702  
55  
56  
57  
58  
59  
60

- 1  
2  
3 17. Lopez PJ, Ron O, Parthasarathy P, et al. Bacterial counts from hospital doctors' ties  
4  
5 are higher than those from shirts. *Am J Infect Control* 2009;37(1):79-80. doi:  
6  
7 10.1016/j.ajic.2008.09.018  
8  
9  
10 18. Perry C, Marshall R, Jones E. Bacterial contamination of uniforms. *J Hosp Infect*  
11  
12 2001;48(3):238-41. doi: 10.1053/jhin.2001.0962  
13  
14  
15 19. Bearman GM, Rosato A, Elam K, et al. A crossover trial of antimicrobial scrubs to  
16  
17 reduce methicillin-resistant *Staphylococcus aureus* burden on healthcare worker  
18  
19 apparel. *Infect Control Hosp Epidemiol* 2012;33(3):268-75. doi: 10.1086/664045  
20  
21  
22 20. Treakle AM, Thom KA, Furuno JP, et al. Bacterial contamination of health care  
23  
24 workers' white coats. *Am J Infect Control* 2009;37(2):101-5. doi:  
25  
26 10.1016/j.ajic.2008.03.009  
27  
28  
29 21. Willis-Owen CA, Subramanian P, Kumari P, et al. Effects of 'bare below the elbows'  
30  
31 policy on hand contamination of 92 hospital doctors in a district general hospital.  
32  
33 *J Hosp Infect* 2010;75(2):116-9. doi: 10.1016/j.jhin.2009.12.013  
34  
35  
36 22. Talbot TR, Johnson JG, Fergus C, et al. Sustained improvement in hand hygiene  
37  
38 adherence: utilizing shared accountability and financial incentives. *Infect Control*  
39  
40 *Hosp Epidemiol* 2013;34(11):1129-36. doi: 10.1086/673445  
41  
42  
43 23. Hutson M RT. Dress for Success: How Clothes Influence Our Performance. *Sci Am*:  
44  
45 *Scientific American*, a division of Nature America, Inc., 2016.  
46  
47  
48 24. Adam H GA. Enclothed Cognition. *J Exp Soc Psychol* 2012;48(4):918-25. doi:  
49  
50 10.1016/j.jesp.2012.02.008  
51  
52  
53 25. Kalb C. How a team of doctors at one hospital boosted hand washing, cut infections  
54  
55 and created a culture of safety: *Yahoo News*; 2014 [updated July 21, 2014].  
56  
57  
58  
59  
60

1  
2  
3 Available from: [https://www.yahoo.com/news/clean-hands--vanderbilt-s-hand-](https://www.yahoo.com/news/clean-hands--vanderbilt-s-hand-washing-initiative-172312795.html)  
4 [washing-initiative-172312795.html](https://www.yahoo.com/news/clean-hands--vanderbilt-s-hand-washing-initiative-172312795.html) accessed June 12, 2017 2017.  
5  
6

- 7  
8 26. Pittet D, Simon A, Hugonnet S, et al. Hand hygiene among physicians:  
9 performance, beliefs, and perceptions. *Ann Intern Med* 2004;141(1):1-8.  
10  
11 27. Chung H, Lee H, Chang DS, et al. Doctor's attire influences perceived empathy in  
12 the patient-doctor relationship. *Patient Educ Couns* 2012  
13  
14 28. Al-Ghobain MO, Al-Drees TM, Alarifi MS, et al. Patients' preferences for physicians'  
15 attire in Saudi Arabia. *Saudi Med J* 2012;33(7):763-67.  
16  
17 29. Au S, Khandwala F, Stelfox HT. Physician attire in the intensive care unit and  
18 patient family perceptions of physician professional characteristics. *JAMA Intern*  
19 *Med* 2013;173(6):465-7. doi: 10.1001/jamainternmed.2013.2732  
20  
21 30. Budny AM, Rogers LC, Mandracchia VJ, et al. The physician's attire and its  
22 influence on patient confidence. *J Am Podiatr Med Assoc* 2006;96(2):132-38.  
23  
24 31. Cha A, Hecht BR, Nelson K, et al. Resident physician attire: Does it make a  
25 difference to our patients? *Am J Obstet Gynecol* 2004;190(5):1484-88.  
26  
27 32. Chang D-S, Lee H, Lee H, et al. What to wear when practicing oriental medicine:  
28 patients' preferences for doctors' attire. *J Altern Complement Med*  
29 2011;17(8):763-7.  
30  
31 33. Gallagher J, Waldron Lynch F, Stack J, et al. Dress and address: patient  
32 preferences regarding doctor's style of dress and patient interaction. *Ir Med J*  
33 2008;101(7):211-13.  
34  
35  
36  
37  
38  
39  
40  
41  
42  
43  
44  
45  
46  
47  
48  
49  
50  
51  
52  
53  
54  
55  
56  
57  
58  
59  
60

- 1  
2  
3 34. Gherardi G, Cameron J, West A, et al. Are we dressed to impress? A descriptive  
4 survey assessing patients' preference of doctors' attire in the hospital setting.  
5  
6 *Clin Med (Lond)* 2009;9(6):519-24.  
7  
8  
9  
10 35. Gooden BR, Smith MJ, Tattersall SJN, et al. Hospitalised patients' views on doctors  
11 and white coats. *Med J Aust* 2001;175(4):219-22.  
12  
13  
14 36. Kocks JWH, Lisman-van Leeuwen Y, Berkelmans PGJL. [Clothing make the doctor--  
15 patients have more confidence in a smartly dressed GP]. *Ned Tijdschr Geneeskd*  
16 2010;154(51-52):A2898.  
17  
18  
19 37. Lill MM, Wilkinson TJ. Judging a book by its cover: Descriptive survey of patients'  
20 preferences for doctors' appearance and mode of address. *BMJ*  
21 2005;331(7531):1524-27.  
22  
23  
24 38. Maruani A, Leger J, Giraudeau B, et al. Effect of physician dress style on patient  
25 confidence. *J Eur Acad Dermatol Venereol* 2012  
26  
27  
28 39. McKinstry B, Wang JX. Putting on the style: what patients think of the way their  
29 doctor dresses. *Br J Gen Pract* 1991;41(348):270, 75-78.  
30  
31  
32 40. McNaughton-Filion L, Chen JS, Norton PG. The physician's appearance. *Fam Med*  
33 1991;23(3):208-11.  
34  
35  
36 41. Niederhauser A, Turner MD, Chauhan SP, et al. Physician attire in the military  
37 setting: does it make a difference to our patients? *Mil Med* 2009;174(8):817-20.  
38  
39  
40 42. Hartmans C HS, Lagrain M, Asch KV, Schoenmakers B. The Doctor's New Clothes:  
41 Professional or Fashionable? *Primary Health Care* 2014;3(145) doi:  
42 10.4172/2167-1079.1000145  
43  
44  
45  
46  
47  
48  
49  
50  
51  
52  
53  
54  
55  
56  
57  
58  
59  
60

- 1  
2  
3 43. Kurihara H, Maeno T, Maeno T. Importance of physicians' attire: factors influencing  
4 the impression it makes on patients, a cross-sectional study. *Asia Pac Fam Med*  
5  
6 the impression it makes on patients, a cross-sectional study. *Asia Pac Fam Med*  
7  
8 2014;13(1):2. doi: 10.1186/1447-056X-13-2  
9
- 10 44. McLean C, Patel P, Sullivan C, et al. Patients' perception of military doctors in  
11  
12 fracture clinics--does the wearing of uniform make a difference? *J R Nav Med*  
13  
14 *Serv* 2005;91(1):45-7.  
15
- 16 45. Sotgiu G, Nieddu P, Mameli L, et al. Evidence for preferences of Italian patients for  
17  
18 physician attire. *Patient Prefer Adherence* 2012;6:361-7. doi:  
19  
20 <http://dx.doi.org/10.2147/PPA.S29587>  
21  
22
- 23 46. Yonekura CL, Certain L, Karen SK, et al. Perceptions of patients, physicians, and  
24  
25 Medical students on physicians' appearance. *Rev Assoc Med Bras*  
26  
27 2013;59(5):452-9. doi: 10.1016/j.ramb.2013.04.005  
28  
29
- 30 47. Jennings JD, Ciaravino SG, Ramsey FV, et al. Physicians' Attire Influences Patients'  
31  
32 Perceptions in the Urban Outpatient Orthopaedic Surgery Setting. *Clin Orthop*  
33  
34 *Relat Res* 2016;474(9):1908-18. doi: 10.1007/s11999-016-4855-7  
35  
36
- 37 48. Lozic S, Aravena PC, Martinez N, et al. [The impact of the orthopedic surgeons'  
38  
39 attire on patient preferences]. *Rev Med Chil* 2017;145(8):987-95. doi:  
40  
41 10.4067/s0034-98872017000800987  
42  
43
- 44 49. Jin J, Sklar GE, Min Sen Oh V, et al. Factors affecting therapeutic compliance: A  
45  
46 review from the patient's perspective. *Ther Clin Risk Manag* 2008;4(1):269-86.  
47  
48
- 49 50. Zolnierek KB, Dimatteo MR. Physician communication and patient adherence to  
50  
51 treatment: a meta-analysis. *Med Care* 2009;47(8):826-34. doi:  
52  
53 10.1097/MLR.0b013e31819a5acc  
54  
55  
56  
57  
58  
59  
60

1  
2  
3 51. Doyle C, Lennox L, Bell D. A systematic review of evidence on the links between  
4  
5 patient experience and clinical safety and effectiveness. *BMJ Open* 2013;3(1)  
6  
7 doi: 10.1136/bmjopen-2012-001570  
8  
9

10 52. Humes KR JN, Ramirez RR. Overview of Race and Hispanic Origin: 2010. In:  
11  
12 United States Department of Commerce EaSA, U.S. Census Bureau, ed., 2011.  
13  
14  
15  
16  
17  
18  
19  
20  
21  
22  
23  
24  
25  
26  
27  
28  
29  
30  
31  
32  
33  
34  
35  
36  
37  
38  
39  
40  
41  
42  
43  
44  
45  
46  
47  
48  
49  
50  
51  
52  
53  
54  
55  
56  
57  
58  
59  
60

For peer review only



## TABLES

**TABLE 1. Characteristics of Study Respondents and Sites\***

| <b>Characteristics</b>                                   | <b>N (%)</b>   |
|----------------------------------------------------------|----------------|
| <b>Age</b>                                               | <b>N=3998</b>  |
| 18-25                                                    | 151 (4)        |
| 26-34                                                    | 340 (9)        |
| 35-54                                                    | 952 (24)       |
| 55-64                                                    | 1103 (28)      |
| 65+                                                      | 1452 (36)      |
| <b>Gender</b>                                            | <b>N=3946</b>  |
| Female                                                   | 1374 (35)      |
| Male                                                     | 2572 (65)      |
| <b>Education</b>                                         | <b>N=3970</b>  |
| Less than High School                                    | 110 (3)        |
| High School                                              | 1080 (27)      |
| Some College                                             | 1101 (28)      |
| College                                                  | 1052 (27)      |
| Graduate Degree or Above                                 | 627 (16)       |
| <b>Race</b>                                              | <b>N=3974</b>  |
| White                                                    | 2802 (71)      |
| African American                                         | 731 (18)       |
| Asian                                                    | 79 (2)         |
| Hispanic                                                 | 181 (5)        |
| Other/Mixed Race                                         | 181 (5)        |
| <b>Number of Different Doctors Seen in the Past Year</b> | <b>N=3987</b>  |
| 0                                                        | 29 (1)         |
| 1                                                        | 250 (6)        |
| 2                                                        | 496 (12)       |
| 3                                                        | 637 (16)       |
| 4                                                        | 606 (15)       |
| 5                                                        | 440 (11)       |
| 6 or more                                                | 1529 (38)      |
| <b>Geographic Region</b>                                 | <b>N =4062</b> |
| Midwest                                                  | 2225           |
| Northeast                                                | 449            |
| West                                                     | 257            |
| South                                                    | 1131           |

**TABLE 2.** Respondent Preferences for Physician Attire (By Setting)

| <b>Preference for Physician Attire [by Setting]</b>                          | <b>Total<br/>no. (%)</b> |
|------------------------------------------------------------------------------|--------------------------|
| <b><i>Which doctor would you prefer for your primary care physician?</i></b> | <b>N=3959</b>            |
| Casual                                                                       | 133 (3)                  |
| Casual & White Coat                                                          | 417 (11)                 |
| Scrubs                                                                       | 201 (5)                  |
| Scrubs & White Coat                                                          | 586 (15)                 |
| Formal                                                                       | 610 (15)                 |
| Formal & White coat                                                          | 1758 (44)                |
| Business Suit                                                                | 254 (6)                  |
| <b><i>Which doctor would you prefer to see when visiting the ER?</i></b>     | <b>N=3966</b>            |
| Casual                                                                       | 54 (1)                   |
| Casual & White Coat                                                          | 240 (6)                  |
| Scrubs                                                                       | 1577 (40)                |
| Scrubs & White Coat                                                          | 1351 (34)                |
| Formal                                                                       | 113 (3)                  |
| Formal & White coat                                                          | 592 (15)                 |
| Business Suit                                                                | 39 (1)                   |
| <b><i>Which doctor would you prefer when in the hospital?</i></b>            | <b>N=3946</b>            |
| Casual                                                                       | 61 (2)                   |
| Casual & White Coat                                                          | 351 (9)                  |
| Scrubs                                                                       | 412 (10)                 |
| Scrubs & White Coat                                                          | 1126 (29)                |
| Formal                                                                       | 280 (7)                  |
| Formal & White coat                                                          | 1546 (39)                |
| Business Suit                                                                | 170 (4)                  |
| <b><i>Which doctor would you prefer for your surgeon?</i></b>                | <b>N=3952</b>            |
| Casual                                                                       | 32 (1)                   |
| Casual & White Coat                                                          | 151 (4)                  |
| Scrubs                                                                       | 1648 (42)                |
| Scrubs & White Coat                                                          | 926 (23)                 |
| Formal                                                                       | 150 (4)                  |
| Formal & White coat                                                          | 824 (21)                 |
| Business Suit                                                                | 221 (6)                  |
| <b><i>Overall, which clothes do you feel your doctor should wear?</i></b>    | <b>N=3924</b>            |
| Casual                                                                       | 60 (2)                   |
| Casual & White Coat                                                          | 292 (7)                  |
| Scrubs                                                                       | 329 (8)                  |
| Scrubs & White Coat                                                          | 1013 (26)                |
| Formal                                                                       | 340 (9)                  |
| Formal & White coat                                                          | 1708 (44)                |
| Business Suit                                                                | 182 (5)                  |

**TABLE 3.** Respondent Opinions Regarding Importance of Physician Attire

| <b>Opinions Regarding Influence and Appropriateness of Physician Dress</b>                            | <b>Total<br/>no. (%)</b> |
|-------------------------------------------------------------------------------------------------------|--------------------------|
| <b><i>How my doctor dresses is important to me.</i></b>                                               | <b>N=4016</b>            |
| Disagree or Strongly Disagree                                                                         | 593 (15)                 |
| Neither Agree nor Disagree                                                                            | 1286 (32)                |
| Agree or Strongly Agree                                                                               | 2,137 (53)               |
| <b><i>How my doctor dresses influences how happy I am with the care I receive.</i></b>                | <b>N=4010</b>            |
| Disagree or Strongly Disagree                                                                         | 931 (23)                 |
| Neither Agree nor Disagree                                                                            | 1620 (40)                |
| Agree or Strongly Agree                                                                               | 1,459 (36)               |
| <b><i>It is appropriate for a doctor to dress casually when seeing patients over the weekend.</i></b> | <b>N=4003</b>            |
| Disagree or Strongly Disagree                                                                         | 857 (21)                 |
| Neither Agree nor Disagree                                                                            | 1372 (34)                |
| Agree or Strongly Agree                                                                               | 1,774 (44)               |
| <b><i>Doctors should wear a white coat when seeing patients in their office.</i></b>                  | <b>N=4007</b>            |
| Disagree or Strongly Disagree                                                                         | 485 (12)                 |
| Neither Agree nor Disagree                                                                            | 1321 (33)                |
| Agree or Strongly Agree                                                                               | 2,201 (55)               |
| <b><i>Doctors should wear a white coat when seeing patient in the ER.</i></b>                         | <b>N=4005</b>            |
| Disagree or Strongly Disagree                                                                         | 704 (18)                 |
| Neither Agree nor Disagree                                                                            | 1519 (38)                |
| Agree or Strongly Agree                                                                               | 1,782 (44)               |
| <b><i>Doctors should wear a white coat when seeing patients in the hospital.</i></b>                  | <b>N=4006</b>            |
| Disagree or Strongly Disagree                                                                         | 346 (9)                  |
| Neither Agree nor Disagree                                                                            | 1188 (30)                |
| Agree or Strongly Agree                                                                               | 2,472 (62)               |
| <b><i>Doctors should always wear a white coat when seeing patients in any setting.</i></b>            | <b>N=4007</b>            |
| Disagree or Strongly Disagree                                                                         | 1,022 (26)               |
| Neither Agree nor Disagree                                                                            | 1641 (41)                |
| Agree or Strongly Agree                                                                               | 1,344 (34)               |

Note: Percentages may not add up to 100 due to rounding.

1  
2  
3  
4  
5  
6  
7  
8  
9  
10  
11  
12  
13  
14  
15  
16  
17  
18  
19  
20  
21  
22  
23  
24  
25  
26  
27  
28  
29  
30  
31  
32  
33  
34  
35  
36  
37  
38  
39  
40  
41  
42  
43  
44  
45  
46  
47

For peer review only

1  
2  
3 **FIGURES**  
4  
5  
6  
7

8 **Figure 1. Photographs of Model Male and Female Physician in Various Attire Used in Survey Instrument**  
9  
10  
11  
12  
13  
14  
15  
16  
17  
18  
19  
20  
21  
22  
23  
24  
25  
26  
27  
28  
29  
30  
31  
32  
33  
34  
35  
36  
37  
38  
39  
40  
41  
42  
43  
44  
45  
46  
47

For peer review only

1  
2  
3  
4  
5  
6  
7  
8  
9  
10  
11  
12  
13  
14  
15  
16  
17  
18  
19  
20  
21  
22  
23  
24  
25  
26  
27  
28  
29  
30  
31  
32  
33  
34  
35  
36  
37  
38  
39  
40  
41  
42  
43  
44  
45  
46  
47

**Figure 2. Rating of Physician Attire Across Preference Domains**

For peer review only

**Figure 3. Preference for white coat by clinical care setting and physician gender**

For peer review only

1  
2  
3  
4  
5  
6  
7  
8  
9  
10  
11  
12  
13  
14  
15  
16  
17  
18  
19  
20  
21  
22  
23  
24  
25  
26  
27  
28  
29  
30  
31  
32  
33  
34  
35  
36  
37  
38  
39  
40  
41  
42  
43  
44  
45  
46  
47

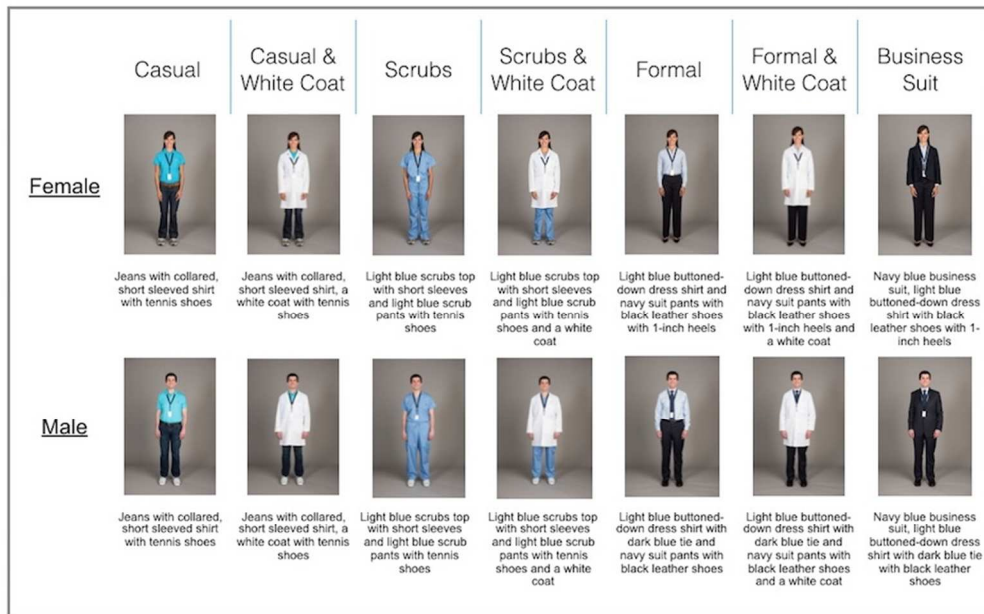

Figure 1. Photographs of Model Male and Female Physician in Various Attire Used in Survey Instrument

80x50mm (300 x 300 DPI)

Review only



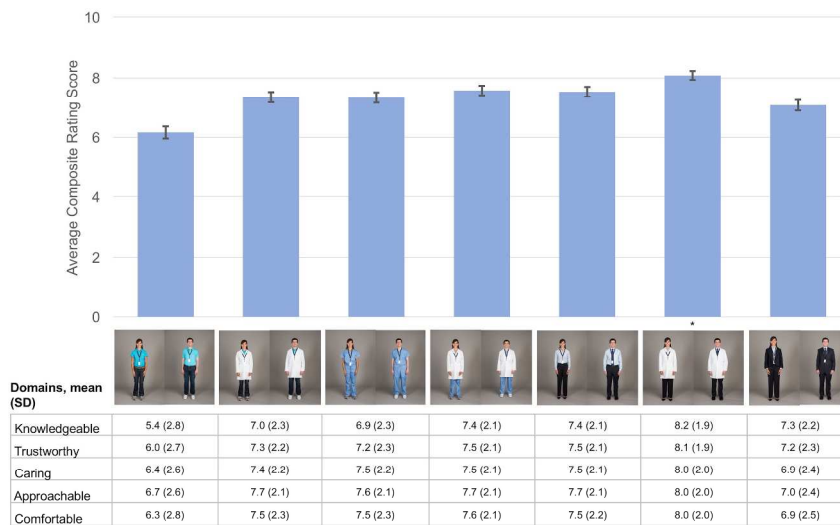

\*All comparisons of the composite score are significantly different when compared to the referent group (formal attire + white coat) at p<0.05.

Figure 2. Rating of Physician Attire Across Preference Domains

338x190mm (300 x 300 DPI)

review only

1  
2  
3  
4  
5  
6  
7  
8  
9  
10  
11  
12  
13  
14  
15  
16  
17  
18  
19  
20  
21  
22  
23  
24  
25  
26  
27  
28  
29  
30  
31  
32  
33  
34  
35  
36  
37  
38  
39  
40  
41  
42  
43  
44  
45  
46  
47  
48  
49  
50  
51  
52  
53  
54  
55  
56  
57  
58  
59  
60

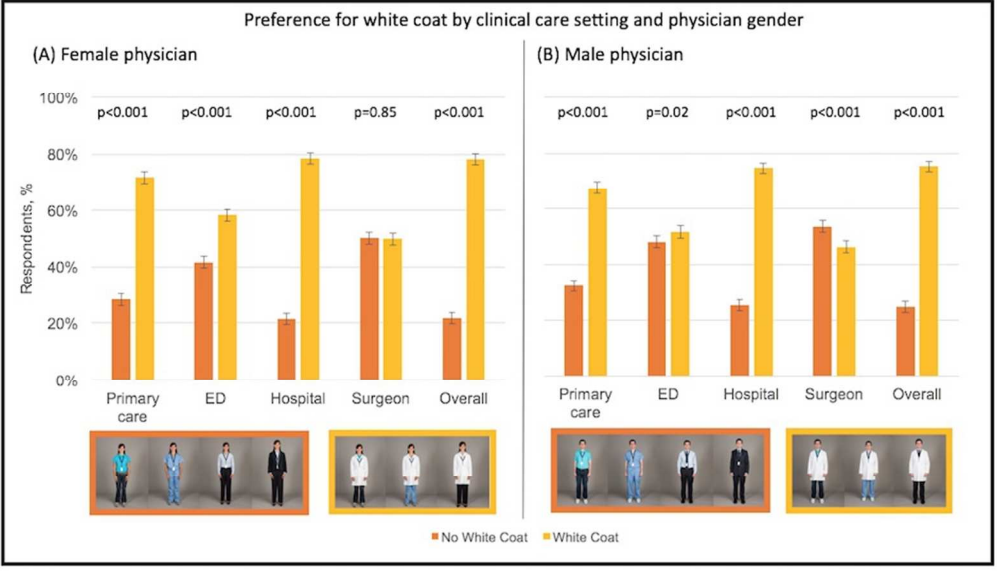

Figure 3. Preference for white coat by clinical care setting and physician gender  
80x45mm (300 x 300 DPI)

Review only

## Understanding the Role of Physician Clothing on Patient Opinion

---

Thank you for taking the time to complete this survey. Your answers will help us better understand whether physician dress influences patients' opinions of their doctor.

Your responses are very important to us. There are no right or wrong answers and we are interested only in your honest opinions. This survey is brief and should take no more than 5 minutes to complete.

**In Section A please provide a rating by circling the number on the scale that corresponds to your answer.**

**In Sections B, C, and D, please provide your one best answer to each question.**

All of your answers will be kept confidential. We will not use names in any notes, reports, or summaries. Your responses will also not be shared with any of your doctors or care providers.

**Section A – Physician Attire - Ratings**

*Please rate the doctor for each of the following questions by circling the number that corresponds to your answer.*

|                                                                                    |                                                                  |                                                       |
|------------------------------------------------------------------------------------|------------------------------------------------------------------|-------------------------------------------------------|
|  | <p>1) How <b>knowledgeable</b> does this doctor appear?</p>      | <p>1 2 3 4 5 6 7 8 9 10</p> <p>Somewhat Extremely</p> |
|                                                                                    | <p>2) How <b>trustworthy</b> does this doctor appear?</p>        | <p>1 2 3 4 5 6 7 8 9 10</p> <p>Somewhat Extremely</p> |
|                                                                                    | <p>3) How <b>caring</b> does this doctor appear?</p>             | <p>1 2 3 4 5 6 7 8 9 10</p> <p>Somewhat Extremely</p> |
|                                                                                    | <p>4) How <b>approachable</b> does this doctor appear?</p>       | <p>1 2 3 4 5 6 7 8 9 10</p> <p>Somewhat Extremely</p> |
|                                                                                    | <p>5) How <b>comfortable</b> does this doctor make you feel?</p> | <p>1 2 3 4 5 6 7 8 9 10</p> <p>Somewhat Extremely</p> |

**Section B – Physician Attire - Preferences**

*Please provide your ONE best answer to each of the following questions*

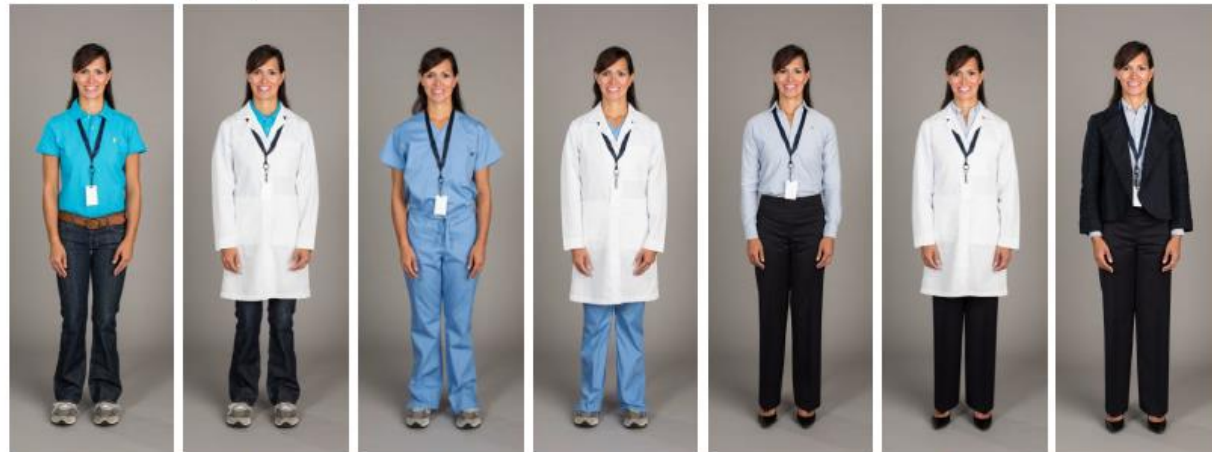

**A B C D E F G**

6) Which doctor would you prefer for your **primary care doctor**? (Please select only ONE option)

**A B C D E F G**

7) Which doctor would you prefer to see when visiting the **emergency room**? (Please select only ONE option)

**A B C D E F G**

8) Which doctor would you prefer to see when **in the hospital**? (Please select only ONE option)

**A B C D E F G**

9) Which doctor would you prefer for your **surgeon**? (Please select only ONE option)

**A B C D E F G**

10) **Overall**, which clothes do you feel doctors should wear? (Please select only ONE option)

**A B C D E F G**

**Section C – General Physician Attire**

*Please indicate your level of agreement with the following statements by checking ONE box to the left of your answer.*

11) How my doctor dresses is important to me.

- Strongly Disagree
- Disagree
- Neither Agree nor Disagree
- Agree
- Strongly Agree

12) How my doctor dresses influences how happy I am with the care I receive.

- Strongly Disagree
- Disagree
- Neither Agree nor Disagree
- Agree
- Strongly Agree

13) It is appropriate for a doctor to dress casually when seeing patients **over the weekend**.

- Strongly Disagree
- Disagree
- Neither Agree nor Disagree
- Agree
- Strongly Agree

14) Doctors should wear a white coat when seeing patients **in their office or clinic**.

- Strongly Disagree
- Disagree
- Neither Agree nor Disagree
- Agree
- Strongly Agree

15) Doctors should wear a white coat when seeing patients in the **emergency room**.

- Strongly Disagree
- Disagree
- Neither Agree nor Disagree
- Agree
- Strongly Agree

16) Doctors should wear a white coat when seeing patients **in the hospital**.

- Strongly Disagree
- Disagree
- Neither Agree nor Disagree
- Agree
- Strongly Agree

17) Doctors should always wear a white coat when seeing patients **in any setting**.

- Strongly Disagree
- Disagree
- Neither Agree nor Disagree
- Agree
- Strongly Agree

**Section D – Demographics**

*Please remember that all of your answers will be kept confidential.*

18) How old are you?

- 18-25                       26-34                       35-54                       55-64                       65 or older

19) What is your gender?

- Male                       Female

20) What is the highest level of education you have completed?

- Less than High School       High School                       Some College                       College                       Graduate Degree

21) What is your race?

- American Indian/Alaska Native       Asian                       Native Hawaiian or Other Pacific Islander  
 Black or African American               White                       Hispanic  
 Other (Please specify) \_\_\_\_\_

22) How many different doctors have you seen in the past year?

- 0                       1                       2                       3                       4                       5                       6 or more

---

**Thank you for taking the time to fill out our survey.  
Your input is greatly appreciated.**

**STROBE 2007 (v4) Statement—Checklist of items that should be included in reports of *cross-sectional studies***

| Section/Topic                | Item # | Recommendation                                                                                                                                                                       | Reported on page # |
|------------------------------|--------|--------------------------------------------------------------------------------------------------------------------------------------------------------------------------------------|--------------------|
| <b>Title and abstract</b>    | 1      | (a) Indicate the study’s design with a commonly used term in the title or the abstract                                                                                               | 3                  |
|                              |        | (b) Provide in the abstract an informative and balanced summary of what was done and what was found                                                                                  | 3                  |
| <b>Introduction</b>          |        |                                                                                                                                                                                      |                    |
| Background/rationale         | 2      | Explain the scientific background and rationale for the investigation being reported                                                                                                 | 5-6                |
| Objectives                   | 3      | State specific objectives, including any prespecified hypotheses                                                                                                                     | 6                  |
| <b>Methods</b>               |        |                                                                                                                                                                                      |                    |
| Study design                 | 4      | Present key elements of study design early in the paper                                                                                                                              | 6                  |
| Setting                      | 5      | Describe the setting, locations, and relevant dates, including periods of recruitment, exposure, follow-up, and data collection                                                      | 6-7                |
| Participants                 | 6      | (a) Give the eligibility criteria, and the sources and methods of selection of participants                                                                                          | 6-7                |
| Variables                    | 7      | Clearly define all outcomes, exposures, predictors, potential confounders, and effect modifiers. Give diagnostic criteria, if applicable                                             | 8-9                |
| Data sources/<br>measurement | 8*     | For each variable of interest, give sources of data and details of methods of assessment (measurement). Describe comparability of assessment methods if there is more than one group | 8-9                |
| Bias                         | 9      | Describe any efforts to address potential sources of bias                                                                                                                            | 7                  |
| Study size                   | 10     | Explain how the study size was arrived at                                                                                                                                            | N/A                |
| Quantitative variables       | 11     | Explain how quantitative variables were handled in the analyses. If applicable, describe which groupings were chosen and why                                                         | 8-9                |
| Statistical methods          | 12     | (a) Describe all statistical methods, including those used to control for confounding                                                                                                | 9                  |
|                              |        | (b) Describe any methods used to examine subgroups and interactions                                                                                                                  | 9                  |
|                              |        | (c) Explain how missing data were addressed                                                                                                                                          | 9                  |
|                              |        | (d) If applicable, describe analytical methods taking account of sampling strategy                                                                                                   | N/A                |
|                              |        | (e) Describe any sensitivity analyses                                                                                                                                                | N/A                |
| <b>Results</b>               |        |                                                                                                                                                                                      |                    |



|                          |     |                                                                                                                                                                                                              |                  |
|--------------------------|-----|--------------------------------------------------------------------------------------------------------------------------------------------------------------------------------------------------------------|------------------|
| Participants             | 13* | (a) Report numbers of individuals at each stage of study—eg numbers potentially eligible, examined for eligibility, confirmed eligible, included in the study, completing follow-up, and analysed            | 9-10             |
|                          |     | (b) Give reasons for non-participation at each stage                                                                                                                                                         | N/A              |
|                          |     | (c) Consider use of a flow diagram                                                                                                                                                                           | N/A              |
| Descriptive data         | 14* | (a) Give characteristics of study participants (eg demographic, clinical, social) and information on exposures and potential confounders                                                                     | 9-10             |
|                          |     | (b) Indicate number of participants with missing data for each variable of interest                                                                                                                          | Table 1-3        |
| Outcome data             | 15* | Report numbers of outcome events or summary measures                                                                                                                                                         | 10-13            |
| Main results             | 16  | (a) Give unadjusted estimates and, if applicable, confounder-adjusted estimates and their precision (eg, 95% confidence interval). Make clear which confounders were adjusted for and why they were included | 10-13            |
|                          |     | (b) Report category boundaries when continuous variables were categorized                                                                                                                                    | N/A              |
|                          |     | (c) If relevant, consider translating estimates of relative risk into absolute risk for a meaningful time period                                                                                             | N/A              |
| Other analyses           | 17  | Report other analyses done—eg analyses of subgroups and interactions, and sensitivity analyses                                                                                                               | 10-13            |
| <b>Discussion</b>        |     |                                                                                                                                                                                                              |                  |
| Key results              | 18  | Summarise key results with reference to study objectives                                                                                                                                                     | 14               |
| Limitations              | 19  | Discuss limitations of the study, taking into account sources of potential bias or imprecision. Discuss both direction and magnitude of any potential bias                                                   | 16               |
| Interpretation           | 20  | Give a cautious overall interpretation of results considering objectives, limitations, multiplicity of analyses, results from similar studies, and other relevant evidence                                   | 15-17            |
| Generalisability         | 21  | Discuss the generalisability (external validity) of the study results                                                                                                                                        | 16               |
| <b>Other information</b> |     |                                                                                                                                                                                                              |                  |
| Funding                  | 22  | Give the source of funding and the role of the funders for the present study and, if applicable, for the original study on which the present article is based                                                | N/A – No funding |

\*Give information separately for cases and controls in case-control studies and, if applicable, for exposed and unexposed groups in cohort and cross-sectional studies.

**Note:** An Explanation and Elaboration article discusses each checklist item and gives methodological background and published examples of transparent reporting. The STROBE checklist is best used in conjunction with this article (freely available on the Web sites of PLoS Medicine at <http://www.plosmedicine.org/>, Annals of Internal Medicine at <http://www.annals.org/>, and Epidemiology at <http://www.epidem.com/>). Information on the STROBE Initiative is available at [www.strobe-statement.org](http://www.strobe-statement.org).

# BMJ Open

## Understanding Patient Preference for Physician Attire: A Cross-Sectional Observational Study of Ten Academic Medical Centers in the United States

|                                 |                                                                                                                                                                                                                                                                                                                                                                                                                                                                                                                                                                                                                                                               |
|---------------------------------|---------------------------------------------------------------------------------------------------------------------------------------------------------------------------------------------------------------------------------------------------------------------------------------------------------------------------------------------------------------------------------------------------------------------------------------------------------------------------------------------------------------------------------------------------------------------------------------------------------------------------------------------------------------|
| Journal:                        | <i>BMJ Open</i>                                                                                                                                                                                                                                                                                                                                                                                                                                                                                                                                                                                                                                               |
| Manuscript ID                   | bmjopen-2017-021239.R2                                                                                                                                                                                                                                                                                                                                                                                                                                                                                                                                                                                                                                        |
| Article Type:                   | Research                                                                                                                                                                                                                                                                                                                                                                                                                                                                                                                                                                                                                                                      |
| Date Submitted by the Author:   | 29-Mar-2018                                                                                                                                                                                                                                                                                                                                                                                                                                                                                                                                                                                                                                                   |
| Complete List of Authors:       | Petrilli, Christopher; University of Michigan, Internal Medicine<br>Saint, Sanjay; Veterans Affairs Ann Arbor Healthcare System, Internal Medicine; University of Michigan, Internal Medicine<br>Jennings, Joseph; Georgetown University School of Medicine, Internal Medicine<br>Caruso, Andrew; Baylor College of Medicine, Internal Medicine<br>Kuhn, Latoya; University of Michigan, Internal Medicine; Veterans Affairs Ann Arbor Healthcare System, Internal Medicine<br>Snyder, Ashley; University of Michigan, Internal Medicine<br>Chopra, Vineet; University of Michigan, Medicine; Veterans Affairs Ann Arbor Healthcare System, Internal Medicine |
| <b>Primary Subject Heading</b>: | Patient-centred medicine                                                                                                                                                                                                                                                                                                                                                                                                                                                                                                                                                                                                                                      |
| Secondary Subject Heading:      | Health policy, Communication, Sociology                                                                                                                                                                                                                                                                                                                                                                                                                                                                                                                                                                                                                       |
| Keywords:                       | Health policy < HEALTH SERVICES ADMINISTRATION & MANAGEMENT, Protocols & guidelines < HEALTH SERVICES ADMINISTRATION & MANAGEMENT, Quality in health care < HEALTH SERVICES ADMINISTRATION & MANAGEMENT, Infection control < INFECTIOUS DISEASES, PUBLIC HEALTH, QUALITATIVE RESEARCH                                                                                                                                                                                                                                                                                                                                                                         |
|                                 |                                                                                                                                                                                                                                                                                                                                                                                                                                                                                                                                                                                                                                                               |

SCHOLARONE™  
Manuscripts

1  
2  
3 **Understanding Patient Preference for Physician Attire: A Cross-Sectional**  
4  
5 **Observational Study of Ten Academic Medical Centers in the United States**  
6  
7

8  
9 Christopher M. Petrilli, MD (1, 2)

10  
11 Sanjay Saint, MD, MPH (2, 1)

12  
13 Joseph J. Jennings, MD (3)

14  
15 Andrew Caruso, MD (4)

16  
17 Latoya Kuhn, MPH (2, 1)

18  
19 Ashley Snyder, MPH (1)

20  
21 Vineet Chopra, MD, MSc (1, 2)

22  
23  
24  
25  
26 **From:** (1) Division of Hospital Medicine, Department of Medicine, University of Michigan  
27  
28 Medical School; (2) VA Ann Arbor Healthcare System both in Ann Arbor, MI. (3) Division  
29  
30 of Gastroenterology, Department of Medicine, Georgetown University School of  
31  
32 Medicine, Washington, DC (4) Division of General Internal Medicine, Department of  
33  
34 Medicine, Baylor College of Medicine, Houston, TX  
35  
36  
37

38  
39 **Abstract word count: 289**

40  
41 **Manuscript Word Count:** 3533, excluding abstract, references, tables and figures

42  
43 **Funding:** There was no funding source of for this study.

44  
45 **Corresponding Author:**

46  
47 Vineet Chopra, MD, MSc

48  
49 2800 Plymouth Road, Building 16 #432W

50  
51 Ann Arbor, MI 48109

52  
53 vineetc@med.umich.edu  
54  
55  
56  
57  
58  
59  
60

1  
2  
3 **Conflicts of Interest:** No Authors Report Any Conflicts of Interest Related to This  
4  
5 Study.  
6  
7  
8  
9

10 **Acknowledgements:** The authors thank Dr. Rachel Thompson, Dr. Rajesh Patel, Dr.  
11 Gabrielle Berger, Dr. Daniel Cabrera, Dr. Nancy Dawson, Dr. Talawnda Bragg,  
12 Stephanie Yuen, Scarlett Shader, Anaiah Massey and Sabian Taylor for their  
13 assistance with data collection at their respective sites. Additionally, the authors thank  
14 Angie Fagerlin, PhD and Brian Zikmund-Fisher, PhD for their assistance with survey  
15 instrument design. The authors would also like to thank our photographer, Scott  
16 Soderberg from Michigan Photography, University of Michigan.  
17  
18  
19  
20  
21  
22  
23  
24  
25  
26  
27

28 **Conception of the work:** Chopra, Petrilli, Saint  
29

30 **Design of the work:** Chopra, Petrilli, Saint  
31

32 **Acquisition of the data:** Chopra, Jennings, Kuhn, Petrilli,  
33

34 **Analysis and interpretation of the data:** AC, VC, JJ, LK, CP, SS, AS  
35

36 **Drafting and critical revision of the manuscript for important intellectual**  
37 **content:** AC, VC, JJ, LK, CP, SS, AS  
38  
39

40 **Accountable for all aspects of the work and approval of the final manuscript:** AC,  
41 VC, JJ, LK, CP, SS, AS  
42  
43  
44  
45

46 **Data Sharing Statement:** Additional unpublished data are not publicly available.  
47

48 **Collaborators:** Dr. Rachel Thompson, Dr. Rajesh Patel, Dr. Gabrielle Berger, Dr.  
49 Daniel Cabrera, Dr. Nancy Dawson, Dr. Talawnda Bragg, Stephanie Yuen, Scarlett  
50 Shader Anaiah Massey, and Sabian Taylor contributed by collecting data at their  
51  
52  
53  
54  
55  
56  
57  
58  
59  
60

1  
2  
3 respective sites, Angie Fagerlin, PhD assisted with the design of the survey instrument  
4  
5 and statistical analysis plan. and Brian Zikmund-Fisher, PhD assisted with the design of  
6  
7 the survey instrument.  
8  
9  
10  
11  
12  
13  
14  
15  
16  
17  
18  
19  
20  
21  
22  
23  
24  
25  
26  
27  
28  
29  
30  
31  
32  
33  
34  
35  
36  
37  
38  
39  
40  
41  
42  
43  
44  
45  
46  
47  
48  
49  
50  
51  
52  
53  
54  
55  
56  
57  
58  
59  
60

For peer review only

1  
2  
3 **OBJECTIVE:** Several large studies have shown that improving the patient experience is  
4 associated with higher reported patient satisfaction, increased adherence to treatment  
5 and clinical outcomes. Whether physician attire can affect the patient experience—and  
6 how this influences satisfaction— is unknown. Therefore, we performed a national,  
7 cross-sectional study to examine patient perceptions, expectations and preferences  
8 regarding physicians dress.  
9

10  
11  
12  
13  
14  
15  
16  
17  
18  
19 **SETTING:** Ten academic hospitals in the United States.  
20

21  
22  
23  
24 **PARTICIPANTS:** Convenience sample of 4,062 patients recruited from June 1, 2015 to  
25 October 31, 2016.  
26  
27

28  
29  
30  
31 **PRIMARY AND SECONDARY OUTCOMES MEASURED:** We conducted a questionnaire-based  
32 study of patients across ten academic hospitals in the United States. The questionnaire  
33 included photographs of a male and female physician dressed in seven different forms  
34 of attire. Patients were asked to rate the provider pictured in various clinical settings.  
35 Preference for attire was calculated as the composite of responses across five domains  
36 (knowledgeable, trustworthy, caring, approachable, and comfortable) via a standardized  
37 instrument. Secondary outcome measures included variation in preferences by  
38 respondent characteristics (e.g., gender), context of care (e.g., inpatient vs. outpatient)  
39 and geographic region.  
40  
41  
42  
43  
44  
45  
46  
47  
48  
49  
50  
51  
52  
53  
54  
55  
56  
57  
58  
59  
60

1  
2  
3 **RESULTS:** Of 4,062 patient responses, 53% indicated that physician attire was important  
4 to them during care. Over one third agreed that it influenced their satisfaction with care.  
5  
6 Compared to all other forms of attire, formal attire with a white coat was most highly  
7  
8 rated ( $p=0.001$  vs. scrubs with white coat;  $p<0.001$  all other comparisons). Important  
9  
10 differences in preferences for attire by clinical context and respondent characteristics  
11  
12 were noted. For example, respondents  $\geq 65$  years preferred formal attire with white  
13  
14 coats ( $p<0.001$ ) while scrubs were most preferred for surgeons.  
15  
16  
17  
18  
19  
20

21 **CONCLUSIONS:** Patients have important expectations and perceptions for physician dress  
22  
23 that vary by context, and region. Nuanced policies addressing physician dress code to  
24  
25 improve patient satisfaction appear important.  
26  
27  
28  
29  
30

31 **TRIAL REGISTRATION:** Observational study, not registered  
32  
33  
34  
35  
36  
37  
38  
39  
40  
41  
42  
43  
44  
45  
46  
47  
48  
49  
50  
51  
52  
53  
54  
55  
56  
57  
58  
59  
60

### STRENGTHS AND LIMITATIONS OF THIS STUDY

- This is the largest study to date that examines patient preferences for physician attire.
- The study design and survey instrument were carefully designed to limit biases associated with physician images.
- The providers pictured in our survey instrument were young, slender, and Caucasian, which may limit generalizability of findings.
- While soliciting patient responses while hospitalized helps generate validity, it is possible that reported impressions may not reflect actual preferences.



## INTRODUCTION

At its core, the practice of medicine hinges on the patient-physician relationship. From initial introductions, physicians work to build rapport to foster a partnership to provide patient-centered care, defined as that which is: “respectful of, and responsive to, individual patient preferences, needs and values.”<sup>1</sup> Not surprisingly, medical school curricula often include courses aimed at improving the patient experience.<sup>2</sup> Similarly, since 2007, the Centers for Medicare and Medicaid have required hospitals to collect, submit and publicly report the results of the Hospital Consumer Assessment of Healthcare Providers and Systems (HCAHPS) survey or risk financial penalties.<sup>3</sup> These data are also important because they have been linked to clinical outcomes. For example, a positive correlation between patient satisfaction, improved mortality and reduced 30-day readmissions have been reported.<sup>4-8</sup>

Although improving the patient experience, and consequently satisfaction, is an important target for many hospitals, how best to do this is unclear. One approach is to understand how physician attire influences the patient experience and develop guidelines based on patients’ preferences. Indeed, some healthcare systems across the country have adopted stringent dress codes. In a recently published article, we contacted human resource professionals and administrators at top US News & World Report Hospitals,<sup>9</sup> and found that five had written guidelines endorsing formal and professional attire. Yet patient preferences for physician attire are not straightforward. In a systematic review, we found that while patients preferred formal attire and white coats overall, attire such as scrubs or casual dress were preferred in specific settings.<sup>9</sup> These findings make intuitive sense: patients often have notions of how a “professional” should

1  
2  
3 dress and are more likely to respond positively to those that meet these stereotypes.  
4  
5 Strategies targeting physician dress may therefore enhance trust and satisfaction.  
6

7  
8 To date, no studies have examined expressed preferences to physician attire,  
9  
10 association to satisfaction, and influencing contextual factors. Therefore, we performed  
11  
12 a cross-sectional survey of patients receiving care across the US using a standardized  
13  
14 questionnaire to better understand patients' perceived preferences of physician attire  
15  
16 across different clinical settings (e.g., hospitalized vs. ambulatory clinic visits). In  
17  
18 addition, we aimed to analyze a larger sample of patients from multiple health systems  
19  
20 than has been previously reported in the literature.  
21  
22  
23  
24  
25

## 26 **METHODS**

### 27 *Study design and population*

28  
29  
30 Between June 1, 2015 to October 31, 2016, a total of 6,280 surveys  
31  
32 were provided to ten academic medical centers in the United States (US) of  
33  
34 which 4,062 surveys were filled and available for analyses (response rate = 65%). The  
35  
36 participating sites spanned four main geographic regions of the US. The questionnaire  
37  
38 consisted of 22 questions and included photographs of a male and a female physician  
39  
40 in various forms of attire. The questionnaire was administered to adult patients that  
41  
42 were receiving care in clinics (outpatients) or admitted to the hospital (inpatients).  
43  
44 Outpatients were approached in waiting rooms of general medicine and medical  
45  
46 subspecialty clinics, while inpatients were approached in their hospital rooms when  
47  
48 admitted to non-surgical units. At all sites, the questionnaire was administered by  
49  
50 research staff using paper instruments. The surveys were administered during normal  
51  
52  
53  
54  
55  
56  
57  
58  
59  
60

1  
2  
3 business hours at times convenient to each sites' research staff. Respondents were  
4  
5 allowed to request help filling out the form from any visitor accompanying them. The  
6  
7 research staff delivered the paper instrument and returned approximately 5-10 minutes  
8  
9 later to pick-up the completed form. Respondents provided verbal consent. No  
10  
11 identifying information was collected from those that completed the study.  
12  
13  
14  
15

### 16 17 *Sample size calculation*

18  
19 It was assumed that responses between two attire forms would be normally  
20  
21 distributed on the 1-10 scale between attire types. An estimated standard deviation of  
22  
23 2.2 was used. If our study included at least 816 patients, (assuming a two-sided alpha  
24  
25 error of 0.05), we expected to have 90% power to detect differences for effect sizes of  
26  
27 0.50 on the 1-10 scale. Fewer subjects would be needed if the standard deviation were  
28  
29 smaller.  
30  
31  
32  
33  
34

### 35 36 *Patient and Public Involvement*

37  
38 The study was designed to understand patient experience and preferences.  
39  
40 However, patients were not included in the design of the survey instrument, recruitment,  
41  
42 or conduct of the study. Patients who participated did so anonymously, and therefore  
43  
44 the study team will be unable to disseminate the results to study participants.  
45  
46  
47  
48  
49  
50  
51

### 52 53 *Study design and data collection*

54  
55  
56  
57  
58  
59  
60

1  
2  
3 The questionnaire was developed from a systematic review that examined the  
4 role of physician attire on patient preferences and satisfaction.<sup>9</sup> A multidisciplinary team  
5 of psychometricians, research scientists, choice architects, survey experts, and  
6 bioethicists developed the study instrument. Each question sought to elicit preferences  
7 regarding various forms of physician attire, including: casual, casual with white coat,  
8 scrubs, scrubs with white coat, formal, formal with white coat, and business suit (**Figure**  
9 **1**). Photographs of the same Caucasian male and female physician donning such attire  
10 were taken by a professional photographer (Scott Soderberg, Michigan Photography,  
11 University of Michigan) with strict attention to facial expressions, pose, lighting, and  
12 other non-verbal cues as these may influence preference or likability. The male and  
13 female physician models were volunteer members of the research team, and each  
14 provided expressed written consent to allow the publication of their photographs.

15  
16  
17  
18  
19  
20  
21  
22  
23  
24  
25  
26  
27  
28  
29  
30  
31 To avoid bias, 14 different versions of the study instrument were created, and  
32 distribution of the questionnaires was randomized to participants. In each version, the  
33 gender and attire of the first physician model varied to prevent ordering, priming or  
34 anchoring effects (**Supplementary File**). The questionnaire had four sections: in the  
35 first section, respondents were asked to rate the physician depicted across five domains  
36 including knowledge, trust, care, approachability, and comfort. In the second section,  
37 respondents were presented with seven photographs of the same physician wearing  
38 different attire and asked to select their preference in various clinical settings. The third  
39 and fourth sections sought respondents' general opinions regarding physician attire,  
40 demographic data and frequency of interactions with physicians.  
41  
42  
43  
44  
45  
46  
47  
48  
49  
50  
51  
52  
53  
54  
55  
56  
57  
58  
59  
60

1  
2  
3 Before administration, the survey instrument was pilot-tested with a convenience  
4 sample of patients at the lead site to ensure photographs, questions, ratings, and  
5 randomly generated order of the 14 surveys at each site would functioned as desired.  
6  
7  
8  
9  
10

### 11 12 *Measurements*

13  
14 Ratings regarding how knowledgeable, trustworthy, caring, and approachable  
15 each physician appeared, as well as how comfortable the physician made the  
16 respondent feel, were measured using a 1-10 scale, where 1 indicated “somewhat  
17 preferred” vs. 10 “extremely preferred.” Preference of attire within specific care settings  
18 (e.g., primary care, emergency room, hospital, surgery, and overall) was assessed  
19 using photos for each of the 7 attire categories. Respondent opinions regarding  
20 importance of dress and white coats were collected using a 1-5 Likert scale, where 1  
21 indicated “strongly disagree” and 5 indicated “strongly agree.” We assessed patient  
22 satisfaction based on agreement with two questions: “How my doctor dresses is  
23 important to me,” and “How my doctor dresses influences how happy I am with the care  
24 received.” For analyses, responses were trichotomized as follows: agreement =  
25 strongly agree and agree; neither agree nor disagree; and disagreement = disagree or  
26 strongly disagree. Demographics including age, gender, education level, race, and  
27 number of physician encounters were collected. Preferences for attire and  
28 demographics were dichotomized for bivariate comparison. Questions that were  
29 unanswered or where more than one response was entered were excluded.  
30  
31  
32  
33  
34  
35  
36  
37  
38  
39  
40  
41  
42  
43  
44  
45  
46  
47  
48  
49  
50  
51  
52

### 53 *Outcomes*

1  
2  
3 The primary outcome of interest – preference for attire -- was calculated as the  
4 composite average of the five individual rating domains (knowledgeable, trustworthy,  
5 caring, approachable, and comfortable). Additionally, variation in preferences for  
6 physician attire by respondent characteristics (e.g., gender, age), context of care (e.g.,  
7 inpatient vs. outpatient) and geographical region (e.g., Northeast, Midwest, South, and  
8 West) were also assessed.  
9  
10  
11  
12  
13  
14  
15  
16  
17  
18

### 19 *Statistical analyses*

20  
21 Data from paper questionnaires were entered independently and in duplicate.  
22 Since respondents were not required to answer all questions, the denominator for  
23 individual questions (and associated response rate) varied. Descriptive statistics  
24 (means, percentage) and standard deviation (SD) were initially used to tabulate results.  
25 Differences in the mean composite rating scores from the physician ratings section were  
26 assessed using one-way ANOVA. To reduce the potential for Type I error, post-  
27 estimation pairwise comparisons were performed using the Tukey-Kramer method.<sup>2</sup>  
28 Differences in proportions for categorical data were compared using the Z-test. Bivariate  
29 comparisons between respondent age, gender, and level of education and  
30 corresponding respondent preferences for attire were assessed using Chi-squared  
31 tests. A two-sided p-value of less than 0.05 was considered statistically significant. All  
32 analyses were performed using Stata 14 MP/SE (StataCorp, College Station, TX).  
33  
34  
35  
36  
37  
38  
39  
40  
41  
42  
43  
44  
45  
46  
47  
48  
49  
50

### 51 *Ethical and Regulatory Oversight*

52 The study was reviewed and deemed exempt from regulation by the University  
53  
54  
55  
56  
57  
58  
59  
60

of Michigan Institutional Review Board (HUM00085305).

## RESULTS

A total of 4,062 questionnaires were completed by patients across ten academic medical centers in the United States. Respondents represented all parts of the United States including the Northeast, Midwest, South and West. Most patients were surveyed while admitted to the hospital (n=2,616 [64%]); however, a substantial proportion of outpatients were also included (n=1,446 [36%]). Respondents were most often white (71%) and male (65%). The plurality of patients was 65 years of age or older (36%). Seventy percent of those surveyed indicated having attended some college or having college degrees. With respect to interactions with the health system, 38% of respondents reported having seen 6 or more physicians in the past year (**Table 1**).

### *Ratings of Physician Attire*

Respondents rated formal attire with white coat for both male and female physician models as the most preferred form of dress compared to other forms of attire with a mean composite score of 8.1 (SD 1.8) [all pairwise comparisons  $p < 0.001$ ]. Cronbach's alpha for the 5-items included in the composite score was 0.96. Ratings for formal attire with white coat were greatest across all domains including how knowledgeable, trustworthy, caring, and approachable the physician appeared as well as how comfortable the physician made the respondent feel. Moreover, these findings were significant in the domains of trustworthiness, caring and how comfortable the physician made the respondent feel in all pairwise comparison testing to other forms of

1  
2  
3 attire ( $p<0.05$ ). For the rating of approachability, formal attire with a white coat was not  
4 statistically different from scrubs with a white coat or formal without a white coat in  
5 pairwise comparison. Scrubs with white coat ranked second overall, with a mean  
6 composite score of 7.6 (SD=1.9) followed by formal attire without a white coat with a  
7 mean composite score of 7.5 (SD=2.0) (**Figure 2**).

### 16 17 *Preferences for Physician Attire by Care Settings*

18  
19 When examining preferences for physician attire by care setting, important  
20 differences emerged. Formal attire with white coat was preferred by respondents for  
21 their primary care (44%) and hospital physician (39%). Conversely, scrubs were rated  
22 highest for emergency room physicians (40%) and surgeons (42%). In both emergency  
23 and surgery settings, scrubs alone were followed in preference by scrubs with white  
24 coats (34% and 23%, respectively). When asked, "Overall, which clothes do you feel  
25 that your doctor should wear?" most respondents preferred formal attire with white coat  
26 (44%) followed by scrubs with white coat (26%) (**Table 2**). Excluding surgeons,  
27 respondents universally preferred physicians in white coats over no white coats. When  
28 evaluating surgeons, respondents indicated no preference for a white coat on female  
29 physicians ( $p=0.85$ ), but preferred male physicians without white coats ( $p<0.001$ ). No  
30 differences in preference by physician gender in other clinical care settings were noted  
31 (**Figure 3**).

### 32 33 34 35 36 37 38 39 40 41 42 43 44 45 46 47 48 49 50 51 *Perceived Influence on Satisfaction, Importance and Appropriateness of Physician Attire*



1  
2  
3 More than half (53%) of the patients surveyed agreed with the statement that  
4 how their doctor dresses was important to them, while 36% of respondents agreed with  
5 the statement that physician attire influenced how happy they were with the care they  
6 received. Views regarding appropriateness of casual attire when physicians see  
7 patients on the weekends were mixed: 44% of respondents stated this was appropriate  
8 while 56% were either neutral or disagreed with the practice.  
9

10  
11  
12 Specific questions regarding when physicians should don a white coat elicited  
13 various preferences. Most respondents (55%) indicated that they agreed or strongly  
14 agreed with the statement that doctors should wear a white coat when seeing patients  
15 in the office. In the emergency room, however, 44% agreed with the statement that  
16 physicians should wear a white coat when seeing patients vs. 56% that indicated either  
17 no preference (38%) or disagreement (18%). When asked whether doctors should wear  
18 a white coat when seeing patients in the hospital, the majority of respondents (62%)  
19 agreed or strongly agreed with this statement (**Table 3**).  
20  
21  
22  
23  
24  
25  
26  
27  
28  
29  
30  
31  
32  
33  
34  
35  
36  
37

### 38 *Variations in Patient Preferences of Physician Attire*

39  
40 Important variations in patient preferences for attire were noted. For example,  
41 female respondents more often preferred scrubs with white coats in emergency room  
42 and hospital settings than males (41% vs. 31% [ $p<0.001$ ] and 32% vs. 27% [ $p=0.001$ ],  
43 respectively). However, both genders indicated formal attire with white coat was overall  
44 most preferred (43% and 44%, respectively). In hospital settings, respondents 65 years  
45 of age or older frequently preferred formal attire with white coats than younger patients  
46 (44% vs. 36%,  $p<0.001$ ). Conversely, younger patients more often preferred scrubs and  
47  
48  
49  
50  
51  
52  
53  
54  
55  
56  
57  
58  
59  
60

1  
2  
3 white coats than formal attire overall (28% vs. 21%,  $p<0.001$ ). Some differences in  
4 preferences regarding physician dress based on respondent education level were also  
5 noted. Specifically, respondents with a college degree preferred formal and white coat  
6 for their primary care provider more often than those without a college degree (48% vs.  
7 42%,  $p<0.001$ ).  
8  
9

10  
11  
12  
13  
14  
15 No differences in preferences between those with three or more physician visits  
16 in the preceding year vs. those with less frequent visits were noted. Similarly,  
17 preferences for attire did not vary by setting in which respondents were polled, although  
18 respondents in the outpatient setting more often preferred doctors in the hospital to  
19 wear scrubs and a white coat compared to hospitalized respondents (32% vs. 27%,  
20  $p=0.002$ ). However, preferences for attire did vary by geographic region. For example,  
21 while formal attire and white coats were preferred across all regions, 50% of  
22 respondents in the West and 51% in the South selected this as their preferred option  
23 compared to 38% and 40% in the Northeast and Midwest, respectively. Conversely,  
24 over half of all respondents in the Northeast selected scrubs as their preferred attire for  
25 surgeons compared to a quarter of respondents in the South (54% vs. 25%,  $p<0.001$ ).  
26  
27  
28  
29  
30  
31  
32  
33  
34  
35  
36  
37  
38  
39  
40  
41

## 42 **DISCUSSION**

43  
44 This study of over 4,000 patients receiving medical care in diverse academic  
45 medical centers is the largest to report preferences regarding physician attire in the US.  
46 Over half of the participants indicated that how a physician dresses was important to  
47 them, with over one in three stating that this influenced how happy they were with care  
48 received. Overall, respondents indicated that formal attire with white coats was the most  
49  
50  
51  
52  
53  
54  
55  
56  
57  
58  
59  
60

1  
2  
3 preferred form of physician dress. However, in settings such as surgery or emergency  
4 rooms, scrubs with white coats were most preferred. Although variation in preferences  
5 by respondent age, gender, education and geography were noted, these findings  
6 indicate that not only do most patients have expectations regarding doctor attire, but  
7 that a “professional” look matters most. Given the size, methodological rigor and  
8 representativeness of these data, policies addressing physician attire should be  
9 considered to improve patient satisfaction.

10  
11  
12  
13  
14  
15  
16  
17  
18  
19 Previous studies have shown that patients harbor conscious and unconscious  
20 biases when it comes to provider dress.<sup>10 11</sup> Thus, our finding that patients have specific  
21 preferences regarding physician attire was not surprising. What this study highlights,  
22 however, is the potential importance of physician attire to the physician-patient  
23 relationship. Indeed, specific clinical and contextual aspects appear to influence a  
24 patient’s preconceived notion of ‘professional attire’. For instance, we found that the  
25 locale where care is delivered (e.g., hospital vs. clinic) as well as context of care (e.g.,  
26 emergency room or surgery) affected preferences. Similarly, we observed that certain  
27 respondent characteristics such as age, gender, and education also influenced their  
28 preferences. These findings can potentially be used to improve the patient experience.  
29 For instance, providers engaged in care of elderly patients (e.g., geriatric clinics,  
30 hospital settings or extended-care facilities) may consider donning formal attire more so  
31 than surgeons or emergency room physicians where scrubs may be more important.  
32 Similarly, hospitals in southern regions of the US may wish to endorse formal attire and  
33 white coats as their preferred policy. For providers in the emergency room and surgical  
34 arenas, such attire may in fact be viewed as out of place – and thus different rules might  
35  
36  
37  
38  
39  
40  
41  
42  
43  
44  
45  
46  
47  
48  
49  
50  
51  
52  
53  
54  
55  
56  
57  
58  
59  
60

1  
2  
3 be necessary. These examples illustrate how policies for specific doctors, settings or  
4  
5 patients can be leveraged to focus on patient-centered care.  
6

7  
8 How should one interpret these findings given concerns for infection transmission  
9  
10 associated with physician dress? Previous studies have shown that bacteria and  
11  
12 pathogens can be isolated from white coats, neckties and sleeves of medical  
13  
14 providers.<sup>12-20</sup> These studies are one of the reasons why a “bare below the elbows”  
15  
16 (BBE) policy exists in some countries. While we did not specifically ask respondents to  
17  
18 consider this risk when choosing attire preferences, three aspects deserve discussion.  
19  
20 First, despite the abundance of literature on infection prevention, we are unaware of any  
21  
22 study that links physician dress to source or transmission of infection. Rather, one study  
23  
24 randomly sampled physicians’ fingertips and reported no association between BBE-  
25  
26 compliant versus non-compliant attire and presence of bacterial colony-forming units or  
27  
28 clinically significant organisms.<sup>21</sup> Second, evidence suggests that other practices (e.g.,  
29  
30 hand hygiene) may be more relevant than physician dress in preventing infection. In an  
31  
32 institution-wide study at Vanderbilt University Medical Center, direct observation  
33  
34 combined with financial incentives for appropriate hand hygiene increased compliance  
35  
36 with hand hygiene policies and decreased device-associated standardized infection  
37  
38 ratios.<sup>22</sup> Conversely, wearing a white coat has been associated with increased selective  
39  
40 and sustained attentiveness to tasks.<sup>23</sup> These findings suggest that clothing may  
41  
42 influence the wearer’s own psychological processes, a phenomenon coined “enclothed  
43  
44 cognition.”<sup>24</sup> Therefore, attentiveness to hand hygiene may, in fact, be increased when  
45  
46 physicians wear white coats or formal attire – improving patient care and satisfaction.<sup>25</sup>  
47  
48  
49  
50  
51  
52  
53  
54  
55  
56  
57  
58  
59  
60  
26 Third, we add to the growing body of evidence that suggests patients have important

1  
2  
3 preferences regarding attire.<sup>9 10 27-47</sup> As further demonstrated by a recent study, these  
4 preferences may evolve over time, as demonstrated by variation in preferences by  
5 respondent age.<sup>48</sup> Physician attire may offer an important modifiable variable in the  
6 doctor-patient relationship that could improve patient experience and satisfaction and  
7 ultimately produce better outcomes.<sup>49-51</sup>  
8  
9  
10  
11  
12  
13

14 Our study has limitations. First, as with other studies of physician attire, we  
15 showed respondents pictures of providers and elicited preferences via a paper  
16 questionnaire. Our providers were young, slender, Caucasian and all cared for in  
17 academic settings, which may have introduced bias into responses. Similarly, we did  
18 not record information for patients who refused to participate in the study, also  
19 potentially introducing bias. Second, while approaching patients as they were receiving  
20 care helps generate validity, it is possible that reported impressions may not reflect  
21 actual preferences on attire but rather current feelings related to their care. Prior studies  
22 have shown that the potential impact of attire on patient satisfaction has to be  
23 considered in the context of the behaviors and attitude of the physician during the  
24 encounter. The survey did not have questions to capture the other dynamics of the  
25 doctor-patient relationship, which may help further explicate responses.<sup>9</sup> Third, we  
26 asked patients to report preferences via Likert scales and predefined categories.  
27 Although this allows for a range of answers (including a neither agree or disagree  
28 option), such categorizations may force respondents to answer in ways that do not  
29 capture their true feelings. Fourth, while the proportion of Caucasian respondents were  
30 similar to 2010 Census data estimates, a lower than expected number of Hispanic  
31 respondents (5% compared with 16% estimated by the Census data) participated.<sup>52</sup>  
32  
33  
34  
35  
36  
37  
38  
39  
40  
41  
42  
43  
44  
45  
46  
47  
48  
49  
50  
51  
52  
53  
54  
55  
56  
57  
58  
59  
60

1  
2  
3 Thus, whether our findings will hold true across race or ethnicity is not known. Finally,  
4 we did not include questions regarding infection transmission given the lack of evidence  
5 supporting the notion that white coats or attire is associated with infections.  
6  
7  
8  
9

10 Our study also has important strengths. First, this is the largest study to examine  
11 patient preferences for physician attire. Given methodological strengths including  
12 randomization of instrument sequence, as well as inclusion of diverse regions and  
13 patient populations, our findings clarify possible dress codes in various healthcare  
14 settings. Second, in contrast to other studies, we specifically designed our study and  
15 survey instrument to avoid biases associated with images. For example, we hired a  
16 professional photographer and studio to ensure photographs of physicians were  
17 otherwise identical. Similarly we also used models of the same race (Caucasian) with  
18 identical postures and facial expressions so as to limit confounding associated with  
19 models of different backgrounds or appearance as has occurred in previous studies.<sup>29 36</sup>  
20  
21  
22  
23  
24  
25  
26  
27  
28  
29  
30  
31  
32  
33  
34  
35  
36  
37  
38  
39  
40  
41  
42  
43  
44  
45  
46  
47  
48  
49  
50  
51  
52  
53  
54  
55  
56  
57  
58  
59  
60

37 39 45 Additionally, we implemented strategies during survey collection such as  
randomizing order of delivery and images to minimize bias. These approaches help lend  
a high degree of internal validity to our findings. Third, our findings have policy  
implications: namely, patients appear to care about attire and may expect to see their  
doctor in certain ways. Hospitals, clinics, emergency departments and ambulatory  
surgical centers should consider using these data to set dress codes for physicians  
providing care in these settings.

In summary, while physician attire cannot replace excellent clinical care, our data  
suggest that it may influence how patients perceive care and perhaps how willing they  
are to trust their doctors. In an era of patient-centeredness and patient satisfaction,

1  
2  
3 physician attire may be an important, modifiable component of patient care. As  
4  
5 perceptions and expectations regarding physician dress by patients, context, and region  
6  
7 exist, nuanced policies that target such factors appear relevant. Future studies  
8  
9 implementing such policies in both hospital, clinic and emergency room settings appear  
10  
11 necessary.  
12  
13  
14  
15  
16  
17  
18  
19  
20  
21  
22  
23  
24  
25  
26  
27  
28  
29  
30  
31  
32  
33  
34  
35  
36  
37  
38  
39  
40  
41  
42  
43  
44  
45  
46  
47  
48  
49  
50  
51  
52  
53  
54  
55  
56  
57  
58  
59  
60

For peer review only

## References

1. Institute of Medicine. Crossing the Quality Chasm: A New Health System for the 21st Century. Washington, DC: National Academy Press 2001:6.
2. Parent K, Jones K, Phillips L, et al. Teaching Patient- and Family-Centered Care: Integrating Shared Humanity into Medical Education Curricula. *AMA J Ethics* 2016;18(1):24-32. doi: 10.1001/journalofethics.2016.18.1.medu1-1601
3. Services TCMaM. The HCAHPS Survey - Frequently Asked Questions [Available from: <https://www.cms.gov/Medicare/Quality-Initiatives-Patient-Assessment-Instruments/HospitalQualityInits/Downloads/HospitalHCAHPSFactSheet201007.pdf> accessed 4/28/2017 2017.
4. Manary MP, Boulding W, Staelin R, et al. The patient experience and health outcomes. *N Engl J Med* 2013;368(3):201-3. doi: 10.1056/NEJMp1211775
5. Boulding W, Glickman SW, Manary MP, et al. Relationship between patient satisfaction with inpatient care and hospital readmission within 30 days. *Am J Manag Care* 2011;17(1):41-8.
6. Jha AK, Orav EJ, Zheng J, et al. Patients' perception of hospital care in the United States. *N Engl J Med* 2008;359(18):1921-31. doi: 10.1056/NEJMsa0804116
7. Barbosa CD, Balp MM, Kulich K, et al. A literature review to explore the link between treatment satisfaction and adherence, compliance, and persistence. *Patient Prefer Adher* 2012;6:39-48. doi: Doi 10.2147/Ppa.S24752
8. O'Malley AS, Forrest CB, Mandelblatt J. Adherence of low-income women to cancer screening recommendations. *J Gen Intern Med* 2002;17(2):144-54.



- 1  
2  
3 9. Petrilli CM, Mack M, Petrilli JJ, et al. Understanding the role of physician attire on  
4  
5 patient perceptions: a systematic review of the literature--targeting attire to  
6  
7 improve likelihood of rapport (TAILOR) investigators. *BMJ Open*  
8  
9 2015;5(1):e006578. doi: 10.1136/bmjopen-2014-006578  
10  
11
- 12 10. Rehman SU, Nietert PJ, Cope DW, et al. What to wear today? Effect of doctor's  
13  
14 attire on the trust and confidence of patients. *Am J Med* 2005;118(11):1279-86.  
15  
16
- 17 11. Beach MC, Fitzgerald A, Saha S. White coat hype: branding physicians with  
18  
19 professional attire. *JAMA Intern Med* 2013;173(6):467-8. doi:  
20  
21 10.1001/jamainternmed.2013.3766  
22  
23
- 24 12. Bearman G, Bryant K, Leekha S, et al. Healthcare personnel attire in non-operating-  
25  
26 room settings. *Infect Control Hosp Epidemiol* 2014;35(2):107-21. doi:  
27  
28 10.1086/675066  
29  
30
- 31 13. Ditchburn I. Should doctors wear ties? *J Hosp Infect* 2006;63(2):227-8. doi:  
32  
33 10.1016/j.jhin.2006.01.027  
34  
35
- 36 14. Munoz-Price LS, Arheart KL, Mills JP, et al. Associations between bacterial  
37  
38 contamination of health care workers' hands and contamination of white coats  
39  
40 and scrubs. *Am J Infect Control* 2012;40(9):e245-8. doi:  
41  
42 10.1016/j.ajic.2012.03.032  
43  
44
- 45 15. Gaspard P, Eschbach E, Gunther D, et al. Meticillin-resistant *Staphylococcus*  
46  
47 *aureus* contamination of healthcare workers' uniforms in long-term care facilities.  
48  
49 *J Hosp Infect* 2009;71(2):170-5. doi: 10.1016/j.jhin.2008.10.028  
50  
51
- 52 16. Loh W, Ng VV, Holton J. Bacterial flora on the white coats of medical students. *J*  
53  
54 *Hosp Infect* 2000;45(1):65-8. doi: 10.1053/jhin.1999.0702  
55  
56  
57  
58  
59  
60

- 1  
2  
3 17. Lopez PJ, Ron O, Parthasarathy P, et al. Bacterial counts from hospital doctors' ties  
4  
5 are higher than those from shirts. *Am J Infect Control* 2009;37(1):79-80. doi:  
6  
7 10.1016/j.ajic.2008.09.018  
8  
9
- 10 18. Perry C, Marshall R, Jones E. Bacterial contamination of uniforms. *J Hosp Infect*  
11  
12 2001;48(3):238-41. doi: 10.1053/jhin.2001.0962  
13
- 14 19. Bearman GM, Rosato A, Elam K, et al. A crossover trial of antimicrobial scrubs to  
15  
16 reduce methicillin-resistant *Staphylococcus aureus* burden on healthcare worker  
17  
18 apparel. *Infect Control Hosp Epidemiol* 2012;33(3):268-75. doi: 10.1086/664045  
19  
20
- 21 20. Treakle AM, Thom KA, Furuno JP, et al. Bacterial contamination of health care  
22  
23 workers' white coats. *Am J Infect Control* 2009;37(2):101-5. doi:  
24  
25 10.1016/j.ajic.2008.03.009  
26  
27
- 28 21. Willis-Owen CA, Subramanian P, Kumari P, et al. Effects of 'bare below the elbows'  
29  
30 policy on hand contamination of 92 hospital doctors in a district general hospital.  
31  
32 *J Hosp Infect* 2010;75(2):116-9. doi: 10.1016/j.jhin.2009.12.013  
33  
34
- 35 22. Talbot TR, Johnson JG, Fergus C, et al. Sustained improvement in hand hygiene  
36  
37 adherence: utilizing shared accountability and financial incentives. *Infect Control*  
38  
39 *Hosp Epidemiol* 2013;34(11):1129-36. doi: 10.1086/673445  
40  
41
- 42 23. Hutson M RT. Dress for Success: How Clothes Influence Our Performance. *Sci Am*:  
43  
44 Scientific American, a division of Nature America, Inc., 2016.  
45  
46
- 47 24. Adam H GA. Enclothed Cognition. *J Exp Soc Psychol* 2012;48(4):918-25. doi:  
48  
49 10.1016/j.jesp.2012.02.008  
50
- 51 25. Kalb C. How a team of doctors at one hospital boosted hand washing, cut infections  
52  
53 and created a culture of safety: Yahoo News; 2014 [updated July 21, 2014].  
54  
55  
56  
57  
58  
59

1  
2  
3 Available from: [https://www.yahoo.com/news/clean-hands--vanderbilt-s-hand-](https://www.yahoo.com/news/clean-hands--vanderbilt-s-hand-washing-initiative-172312795.html)  
4 [washing-initiative-172312795.html](https://www.yahoo.com/news/clean-hands--vanderbilt-s-hand-washing-initiative-172312795.html) accessed June 12, 2017 2017.  
5  
6

- 7  
8 26. Pittet D, Simon A, Hugonnet S, et al. Hand hygiene among physicians:  
9 performance, beliefs, and perceptions. *Ann Intern Med* 2004;141(1):1-8.  
10  
11 27. Chung H, Lee H, Chang DS, et al. Doctor's attire influences perceived empathy in  
12 the patient-doctor relationship. *Patient Educ Couns* 2012  
13  
14 28. Al-Ghobain MO, Al-Drees TM, Alarifi MS, et al. Patients' preferences for physicians'  
15 attire in Saudi Arabia. *Saudi Med J* 2012;33(7):763-67.  
16  
17 29. Au S, Khandwala F, Stelfox HT. Physician attire in the intensive care unit and  
18 patient family perceptions of physician professional characteristics. *JAMA Intern*  
19 *Med* 2013;173(6):465-7. doi: 10.1001/jamainternmed.2013.2732  
20  
21 30. Budny AM, Rogers LC, Mandracchia VJ, et al. The physician's attire and its  
22 influence on patient confidence. *J Am Podiatr Med Assoc* 2006;96(2):132-38.  
23  
24 31. Cha A, Hecht BR, Nelson K, et al. Resident physician attire: Does it make a  
25 difference to our patients? *Am J Obstet Gynecol* 2004;190(5):1484-88.  
26  
27 32. Chang D-S, Lee H, Lee H, et al. What to wear when practicing oriental medicine:  
28 patients' preferences for doctors' attire. *J Altern Complement Med*  
29 2011;17(8):763-7.  
30  
31 33. Gallagher J, Waldron Lynch F, Stack J, et al. Dress and address: patient  
32 preferences regarding doctor's style of dress and patient interaction. *Ir Med J*  
33 2008;101(7):211-13.  
34  
35  
36  
37  
38  
39  
40  
41  
42  
43  
44  
45  
46  
47  
48  
49  
50  
51  
52  
53  
54  
55  
56  
57  
58  
59  
60

- 1  
2  
3 34. Gherardi G, Cameron J, West A, et al. Are we dressed to impress? A descriptive  
4 survey assessing patients' preference of doctors' attire in the hospital setting.  
5  
6 *Clin Med (Lond)* 2009;9(6):519-24.  
7  
8  
9  
10 35. Gooden BR, Smith MJ, Tattersall SJN, et al. Hospitalised patients' views on doctors  
11 and white coats. *Med J Aust* 2001;175(4):219-22.  
12  
13  
14 36. Kocks JWH, Lisman-van Leeuwen Y, Berkelmans PGJL. [Clothing make the doctor--  
15 patients have more confidence in a smartly dressed GP]. *Ned Tijdschr Geneeskd*  
16 2010;154(51-52):A2898.  
17  
18  
19 37. Lill MM, Wilkinson TJ. Judging a book by its cover: Descriptive survey of patients'  
20 preferences for doctors' appearance and mode of address. *BMJ*  
21 2005;331(7531):1524-27.  
22  
23  
24  
25  
26  
27 38. Maruani A, Leger J, Giraudeau B, et al. Effect of physician dress style on patient  
28 confidence. *J Eur Acad Dermatol Venereol* 2012  
29  
30  
31  
32 39. McKinstry B, Wang JX. Putting on the style: what patients think of the way their  
33 doctor dresses. *Br J Gen Pract* 1991;41(348):270, 75-78.  
34  
35  
36  
37 40. McNaughton-Filion L, Chen JS, Norton PG. The physician's appearance. *Fam Med*  
38 1991;23(3):208-11.  
39  
40  
41  
42 41. Niederhauser A, Turner MD, Chauhan SP, et al. Physician attire in the military  
43 setting: does it make a difference to our patients? *Mil Med* 2009;174(8):817-20.  
44  
45  
46  
47 42. Hartmans C HS, Lagrain M, Asch KV, Schoenmakers B. The Doctor's New Clothes:  
48 Professional or Fashionable? *Primary Health Care* 2014;3(145) doi:  
49 10.4172/2167-1079.1000145  
50  
51  
52  
53  
54  
55  
56  
57  
58  
59  
60

- 1  
2  
3 43. Kurihara H, Maeno T, Maeno T. Importance of physicians' attire: factors influencing  
4  
5 the impression it makes on patients, a cross-sectional study. *Asia Pac Fam Med*  
6  
7 2014;13(1):2. doi: 10.1186/1447-056X-13-2  
8  
9
- 10 44. McLean C, Patel P, Sullivan C, et al. Patients' perception of military doctors in  
11  
12 fracture clinics--does the wearing of uniform make a difference? *J R Nav Med*  
13  
14 *Serv* 2005;91(1):45-7.  
15  
16
- 17 45. Sotgiu G, Nieddu P, Mameli L, et al. Evidence for preferences of Italian patients for  
18  
19 physician attire. *Patient Prefer Adherence* 2012;6:361-7. doi:  
20  
21 <http://dx.doi.org/10.2147/PPA.S29587>  
22  
23
- 24 46. Yonekura CL, Certain L, Karen SK, et al. Perceptions of patients, physicians, and  
25  
26 Medical students on physicians' appearance. *Rev Assoc Med Bras*  
27  
28 2013;59(5):452-9. doi: 10.1016/j.ramb.2013.04.005  
29  
30
- 31 47. Jennings JD, Ciaravino SG, Ramsey FV, et al. Physicians' Attire Influences Patients'  
32  
33 Perceptions in the Urban Outpatient Orthopaedic Surgery Setting. *Clin Orthop*  
34  
35 *Relat Res* 2016;474(9):1908-18. doi: 10.1007/s11999-016-4855-7  
36  
37
- 38 48. Lozic S, Aravena PC, Martinez N, et al. [The impact of the orthopedic surgeons'  
39  
40 attire on patient preferences]. *Rev Med Chil* 2017;145(8):987-95. doi:  
41  
42 10.4067/s0034-98872017000800987  
43  
44
- 45 49. Jin J, Sklar GE, Min Sen Oh V, et al. Factors affecting therapeutic compliance: A  
46  
47 review from the patient's perspective. *Ther Clin Risk Manag* 2008;4(1):269-86.  
48  
49
- 50 50. Zolnierek KB, Dimatteo MR. Physician communication and patient adherence to  
51  
52 treatment: a meta-analysis. *Med Care* 2009;47(8):826-34. doi:  
53  
54 10.1097/MLR.0b013e31819a5acc  
55  
56  
57  
58  
59  
60

1  
2  
3 51. Doyle C, Lennox L, Bell D. A systematic review of evidence on the links between  
4  
5 patient experience and clinical safety and effectiveness. *BMJ Open* 2013;3(1)  
6  
7 doi: 10.1136/bmjopen-2012-001570  
8  
9

10 52. Humes KR JN, Ramirez RR. Overview of Race and Hispanic Origin: 2010. In:  
11  
12 United States Department of Commerce EaSA, U.S. Census Bureau, ed., 2011.  
13  
14  
15  
16  
17  
18  
19  
20  
21  
22  
23  
24  
25  
26  
27  
28  
29  
30  
31  
32  
33  
34  
35  
36  
37  
38  
39  
40  
41  
42  
43  
44  
45  
46  
47  
48  
49  
50  
51  
52  
53  
54  
55  
56  
57  
58  
59  
60

For peer review only

## TABLES

**TABLE 1. Characteristics of Study Respondents and Sites\***

| <b>Characteristics</b>                                   | <b>N (%)</b>   |
|----------------------------------------------------------|----------------|
| <b>Age</b>                                               | <b>N=3998</b>  |
| 18-25                                                    | 151 (4)        |
| 26-34                                                    | 340 (9)        |
| 35-54                                                    | 952 (24)       |
| 55-64                                                    | 1103 (28)      |
| 65+                                                      | 1452 (36)      |
| <b>Gender</b>                                            | <b>N=3946</b>  |
| Female                                                   | 1374 (35)      |
| Male                                                     | 2572 (65)      |
| <b>Education</b>                                         | <b>N=3970</b>  |
| Less than High School                                    | 110 (3)        |
| High School                                              | 1080 (27)      |
| Some College                                             | 1101 (28)      |
| College                                                  | 1052 (27)      |
| Graduate Degree or Above                                 | 627 (16)       |
| <b>Race</b>                                              | <b>N=3974</b>  |
| White                                                    | 2802 (71)      |
| African American                                         | 731 (18)       |
| Asian                                                    | 79 (2)         |
| Hispanic                                                 | 181 (5)        |
| Other/Mixed Race                                         | 181 (5)        |
| <b>Number of Different Doctors Seen in the Past Year</b> | <b>N=3987</b>  |
| 0                                                        | 29 (1)         |
| 1                                                        | 250 (6)        |
| 2                                                        | 496 (12)       |
| 3                                                        | 637 (16)       |
| 4                                                        | 606 (15)       |
| 5                                                        | 440 (11)       |
| 6 or more                                                | 1529 (38)      |
| <b>Geographic Region</b>                                 | <b>N =4062</b> |
| Midwest                                                  | 2225           |
| Northeast                                                | 449            |
| West                                                     | 257            |
| South                                                    | 1131           |

**TABLE 2.** Respondent Preferences for Physician Attire (By Setting)

| <b>Preference for Physician Attire [by Setting]</b>                          | <b>Total<br/>no. (%)</b> |
|------------------------------------------------------------------------------|--------------------------|
| <b><i>Which doctor would you prefer for your primary care physician?</i></b> | <b>N=3959</b>            |
| Casual                                                                       | 133 (3)                  |
| Casual & White Coat                                                          | 417 (11)                 |
| Scrubs                                                                       | 201 (5)                  |
| Scrubs & White Coat                                                          | 586 (15)                 |
| Formal                                                                       | 610 (15)                 |
| Formal & White coat                                                          | 1758 (44)                |
| Business Suit                                                                | 254 (6)                  |
| <b><i>Which doctor would you prefer to see when visiting the ER?</i></b>     | <b>N=3966</b>            |
| Casual                                                                       | 54 (1)                   |
| Casual & White Coat                                                          | 240 (6)                  |
| Scrubs                                                                       | 1577 (40)                |
| Scrubs & White Coat                                                          | 1351 (34)                |
| Formal                                                                       | 113 (3)                  |
| Formal & White coat                                                          | 592 (15)                 |
| Business Suit                                                                | 39 (1)                   |
| <b><i>Which doctor would you prefer when in the hospital?</i></b>            | <b>N=3946</b>            |
| Casual                                                                       | 61 (2)                   |
| Casual & White Coat                                                          | 351 (9)                  |
| Scrubs                                                                       | 412 (10)                 |
| Scrubs & White Coat                                                          | 1126 (29)                |
| Formal                                                                       | 280 (7)                  |
| Formal & White coat                                                          | 1546 (39)                |
| Business Suit                                                                | 170 (4)                  |
| <b><i>Which doctor would you prefer for your surgeon?</i></b>                | <b>N=3952</b>            |
| Casual                                                                       | 32 (1)                   |
| Casual & White Coat                                                          | 151 (4)                  |
| Scrubs                                                                       | 1648 (42)                |
| Scrubs & White Coat                                                          | 926 (23)                 |
| Formal                                                                       | 150 (4)                  |
| Formal & White coat                                                          | 824 (21)                 |
| Business Suit                                                                | 221 (6)                  |
| <b><i>Overall, which clothes do you feel your doctor should wear?</i></b>    | <b>N=3924</b>            |
| Casual                                                                       | 60 (2)                   |
| Casual & White Coat                                                          | 292 (7)                  |
| Scrubs                                                                       | 329 (8)                  |
| Scrubs & White Coat                                                          | 1013 (26)                |
| Formal                                                                       | 340 (9)                  |
| Formal & White coat                                                          | 1708 (44)                |
| Business Suit                                                                | 182 (5)                  |



**TABLE 3.** Respondent Opinions Regarding Importance of Physician Attire

| <b>Opinions Regarding Influence and Appropriateness of Physician Dress</b>                            | <b>Total<br/>no. (%)</b> |
|-------------------------------------------------------------------------------------------------------|--------------------------|
| <b><i>How my doctor dresses is important to me.</i></b>                                               | <b>N=4016</b>            |
| Disagree or Strongly Disagree                                                                         | 593 (15)                 |
| Neither Agree nor Disagree                                                                            | 1286 (32)                |
| Agree or Strongly Agree                                                                               | 2,137 (53)               |
| <b><i>How my doctor dresses influences how happy I am with the care I receive.</i></b>                | <b>N=4010</b>            |
| Disagree or Strongly Disagree                                                                         | 931 (23)                 |
| Neither Agree nor Disagree                                                                            | 1620 (40)                |
| Agree or Strongly Agree                                                                               | 1,459 (36)               |
| <b><i>It is appropriate for a doctor to dress casually when seeing patients over the weekend.</i></b> | <b>N=4003</b>            |
| Disagree or Strongly Disagree                                                                         | 857 (21)                 |
| Neither Agree nor Disagree                                                                            | 1372 (34)                |
| Agree or Strongly Agree                                                                               | 1,774 (44)               |
| <b><i>Doctors should wear a white coat when seeing patients in their office.</i></b>                  | <b>N=4007</b>            |
| Disagree or Strongly Disagree                                                                         | 485 (12)                 |
| Neither Agree nor Disagree                                                                            | 1321 (33)                |
| Agree or Strongly Agree                                                                               | 2,201 (55)               |
| <b><i>Doctors should wear a white coat when seeing patient in the ER.</i></b>                         | <b>N=4005</b>            |
| Disagree or Strongly Disagree                                                                         | 704 (18)                 |
| Neither Agree nor Disagree                                                                            | 1519 (38)                |
| Agree or Strongly Agree                                                                               | 1,782 (44)               |
| <b><i>Doctors should wear a white coat when seeing patients in the hospital.</i></b>                  | <b>N=4006</b>            |
| Disagree or Strongly Disagree                                                                         | 346 (9)                  |
| Neither Agree nor Disagree                                                                            | 1188 (30)                |
| Agree or Strongly Agree                                                                               | 2,472 (62)               |
| <b><i>Doctors should always wear a white coat when seeing patients in any setting.</i></b>            | <b>N=4007</b>            |
| Disagree or Strongly Disagree                                                                         | 1,022 (26)               |
| Neither Agree nor Disagree                                                                            | 1641 (41)                |
| Agree or Strongly Agree                                                                               | 1,344 (34)               |

Note: Percentages may not add up to 100 due to rounding.

1  
2  
3  
4  
5  
6  
7  
8  
9  
10  
11  
12  
13  
14  
15  
16  
17  
18  
19  
20  
21  
22  
23  
24  
25  
26  
27  
28  
29  
30  
31  
32  
33  
34  
35  
36  
37  
38  
39  
40  
41  
42  
43  
44  
45  
46  
47

For peer review only

1  
2  
3  
4  
5  
6  
7  
8  
9  
10  
11  
12  
13  
14  
15  
16  
17  
18  
19  
20  
21  
22  
23  
24  
25  
26  
27  
28  
29  
30  
31  
32  
33  
34  
35  
36  
37  
38  
39  
40  
41  
42  
43  
44  
45  
46  
47

**FIGURES**

**Figure 1. Photographs of Model Male and Female Physician in Various Attire Used in Survey Instrument**

For peer review only

**Figure 2. Rating of Physician Attire Across Preference Domains**

For peer review only

1  
2  
3  
4  
5  
6  
7  
8  
9  
10  
11  
12  
13  
14  
15  
16  
17  
18  
19  
20  
21  
22  
23  
24  
25  
26  
27  
28  
29  
30  
31  
32  
33  
34  
35  
36  
37  
38  
39  
40  
41  
42  
43  
44  
45  
46  
47

1  
2  
3  
4  
5  
6  
7  
8  
9  
10  
11  
12  
13  
14  
15  
16  
17  
18  
19  
20  
21  
22  
23  
24  
25  
26  
27  
28  
29  
30  
31  
32  
33  
34  
35  
36  
37  
38  
39  
40  
41  
42  
43  
44  
45  
46  
47

**Figure 3. Preference for white coat by clinical care setting and physician gender**

For peer review only

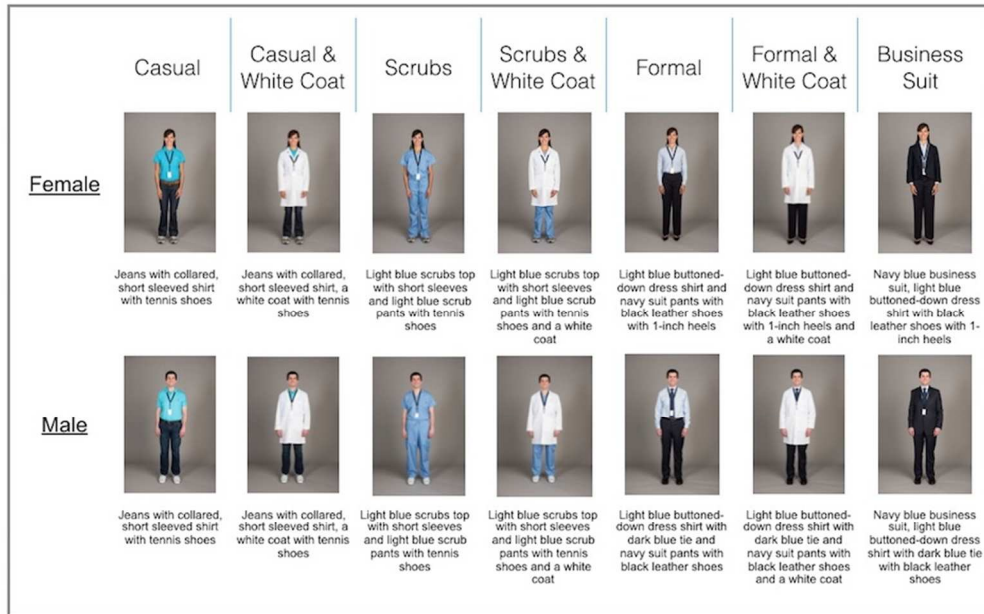

Figure 1. Photographs of Model Male and Female Physician in Various Attire Used in Survey Instrument. (Photo by Scott Soderberg, Michigan Photography, University of Michigan)

80x50mm (300 x 300 DPI)

1  
2  
3  
4  
5  
6  
7  
8  
9  
10  
11  
12  
13  
14  
15  
16  
17  
18  
19  
20  
21  
22  
23  
24  
25  
26  
27  
28  
29  
30  
31  
32  
33  
34  
35  
36  
37  
38  
39  
40  
41  
42  
43  
44  
45  
46  
47  
48  
49  
50  
51  
52  
53  
54  
55  
56  
57  
58  
59  
60

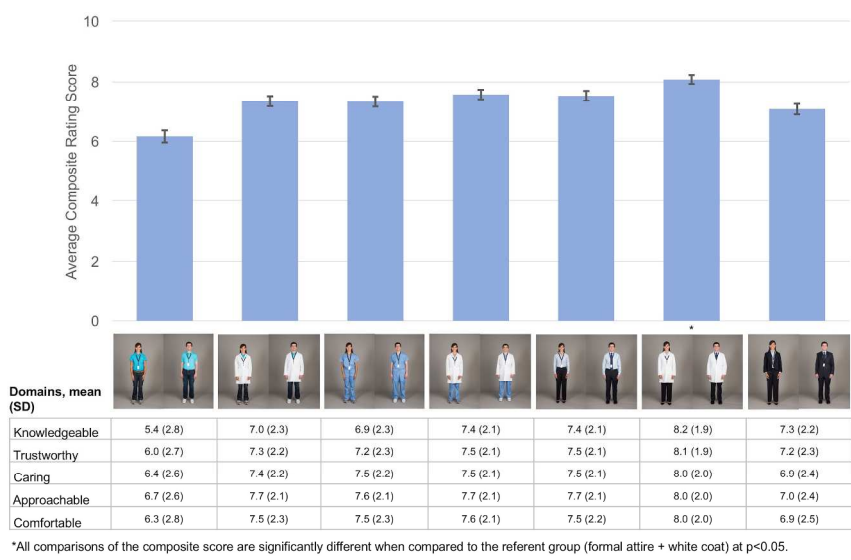

Figure 2. Rating of Physician Attire Across Preference Domains. (Photo by Scott Soderberg, Michigan Photography, University of Michigan)

338x190mm (300 x 300 DPI)

Review only

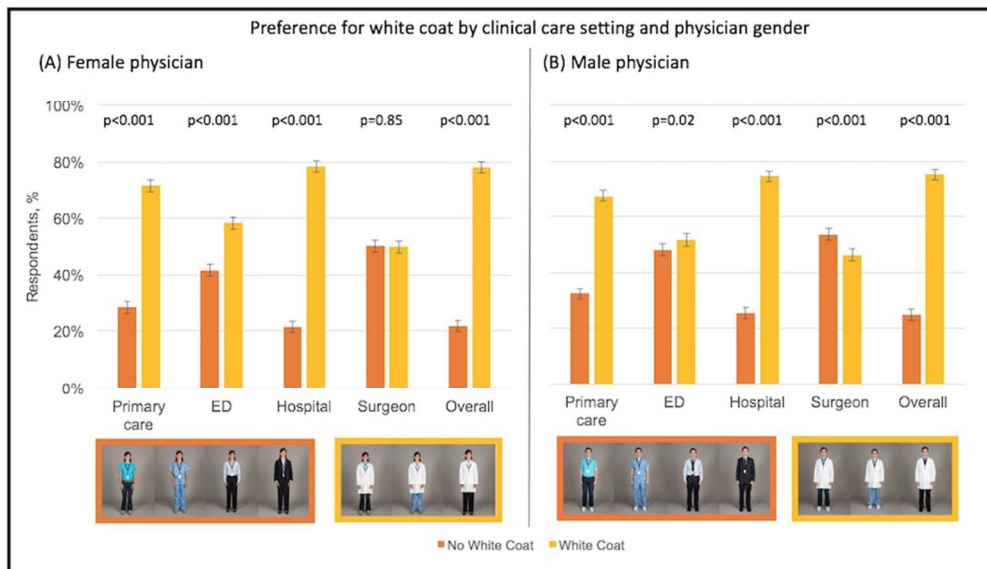

Figure 3. Preference for white coat by clinical care setting and physician gender. (Photo by Scott Soderberg, Michigan Photography, University of Michigan)

80x45mm (300 x 300 DPI)



## Understanding the Role of Physician Clothing on Patient Opinion

---

Thank you for taking the time to complete this survey. Your answers will help us better understand whether physician dress influences patients' opinions of their doctor.

Your responses are very important to us. There are no right or wrong answers and we are interested only in your honest opinions. This survey is brief and should take no more than 5 minutes to complete.

**In Section A please provide a rating by circling the number on the scale that corresponds to your answer.**

**In Sections B, C, and D, please provide your one best answer to each question.**

All of your answers will be kept confidential. We will not use names in any notes, reports, or summaries. Your responses will also not be shared with any of your doctors or care providers.

**Section A – Physician Attire - Ratings**

*Please rate the doctor for each of the following questions by circling the number that corresponds to your answer.*

|                                                                                    |                                                                  |                                                       |
|------------------------------------------------------------------------------------|------------------------------------------------------------------|-------------------------------------------------------|
| 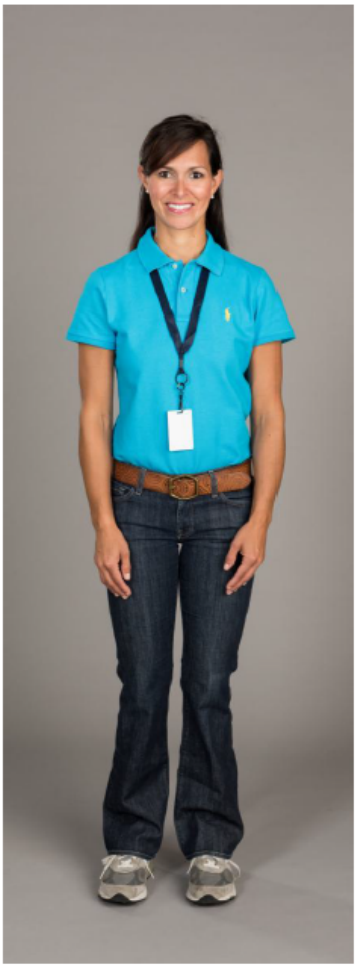 | <p>1) How <b>knowledgeable</b> does this doctor appear?</p>      | <p>1 2 3 4 5 6 7 8 9 10</p> <p>Somewhat Extremely</p> |
|                                                                                    | <p>2) How <b>trustworthy</b> does this doctor appear?</p>        | <p>1 2 3 4 5 6 7 8 9 10</p> <p>Somewhat Extremely</p> |
|                                                                                    | <p>3) How <b>caring</b> does this doctor appear?</p>             | <p>1 2 3 4 5 6 7 8 9 10</p> <p>Somewhat Extremely</p> |
|                                                                                    | <p>4) How <b>approachable</b> does this doctor appear?</p>       | <p>1 2 3 4 5 6 7 8 9 10</p> <p>Somewhat Extremely</p> |
|                                                                                    | <p>5) How <b>comfortable</b> does this doctor make you feel?</p> | <p>1 2 3 4 5 6 7 8 9 10</p> <p>Somewhat Extremely</p> |

**Section B – Physician Attire - Preferences**

*Please provide your ONE best answer to each of the following questions*

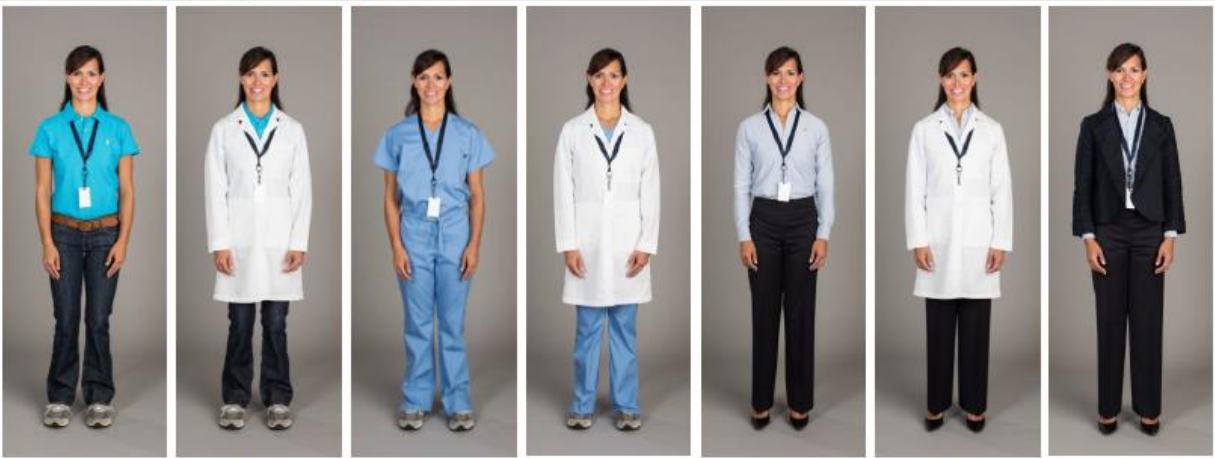

**A B C D E F G**

6) Which doctor would you prefer for your **primary care doctor**? (Please select only ONE option)

|                          |                          |                          |                          |                          |                          |                          |
|--------------------------|--------------------------|--------------------------|--------------------------|--------------------------|--------------------------|--------------------------|
| <input type="checkbox"/> |
|--------------------------|--------------------------|--------------------------|--------------------------|--------------------------|--------------------------|--------------------------|

**A B C D E F G**

7) Which doctor would you prefer to see when visiting the **emergency room**? (Please select only ONE option)

|                          |                          |                          |                          |                          |                          |                          |
|--------------------------|--------------------------|--------------------------|--------------------------|--------------------------|--------------------------|--------------------------|
| <input type="checkbox"/> |
|--------------------------|--------------------------|--------------------------|--------------------------|--------------------------|--------------------------|--------------------------|

**A B C D E F G**

8) Which doctor would you prefer to see when **in the hospital**? (Please select only ONE option)

|                          |                          |                          |                          |                          |                          |                          |
|--------------------------|--------------------------|--------------------------|--------------------------|--------------------------|--------------------------|--------------------------|
| <input type="checkbox"/> |
|--------------------------|--------------------------|--------------------------|--------------------------|--------------------------|--------------------------|--------------------------|

**A B C D E F G**

9) Which doctor would you prefer for your **surgeon**? (Please select only ONE option)

|                          |                          |                          |                          |                          |                          |                          |
|--------------------------|--------------------------|--------------------------|--------------------------|--------------------------|--------------------------|--------------------------|
| <input type="checkbox"/> |
|--------------------------|--------------------------|--------------------------|--------------------------|--------------------------|--------------------------|--------------------------|

**A B C D E F G**

10) **Overall**, which clothes do you feel doctors should wear? (Please select only ONE option)

|                          |                          |                          |                          |                          |                          |                          |
|--------------------------|--------------------------|--------------------------|--------------------------|--------------------------|--------------------------|--------------------------|
| <input type="checkbox"/> |
|--------------------------|--------------------------|--------------------------|--------------------------|--------------------------|--------------------------|--------------------------|

**A B C D E F G**

**Section C – General Physician Attire**

*Please indicate your level of agreement with the following statements by checking ONE box to the left of your answer.*

11) How my doctor dresses is important to me.

Strongly Disagree       Disagree       Neither Agree nor Disagree       Agree       Strongly Agree

12) How my doctor dresses influences how happy I am with the care I receive.

Strongly Disagree       Disagree       Neither Agree nor Disagree       Agree       Strongly Agree

13) It is appropriate for a doctor to dress casually when seeing patients **over the weekend**.

Strongly Disagree       Disagree       Neither Agree nor Disagree       Agree       Strongly Agree

14) Doctors should wear a white coat when seeing patients **in their office or clinic**.

Strongly Disagree       Disagree       Neither Agree nor Disagree       Agree       Strongly Agree

15) Doctors should wear a white coat when seeing patients in the **emergency room**.

Strongly Disagree       Disagree       Neither Agree nor Disagree       Agree       Strongly Agree

16) Doctors should wear a white coat when seeing patients **in the hospital**.

Strongly Disagree       Disagree       Neither Agree nor Disagree       Agree       Strongly Agree

17) Doctors should always wear a white coat when seeing patients **in any setting**.

Strongly Disagree       Disagree       Neither Agree nor Disagree       Agree       Strongly Agree

**Section D – Demographics**

*Please remember that all of your answers will be kept confidential.*

18) How old are you?

- 18-25
- 26-34
- 35-54
- 55-64
- 65 or older

19) What is your gender?

- Male
- Female

20) What is the highest level of education you have completed?

- Less than High School
- High School
- Some College
- College
- Graduate Degree

21) What is your race?

- American Indian/Alaska Native
- Asian
- Native Hawaiian or Other Pacific Islander
- Black or African American
- White
- Hispanic
- Other (Please specify) \_\_\_\_\_

22) How many different doctors have you seen in the past year?

- 0
- 1
- 2
- 3
- 4
- 5
- 6 or more

---

**Thank you for taking the time to fill out our survey.  
Your input is greatly appreciated.**

**STROBE 2007 (v4) Statement—Checklist of items that should be included in reports of *cross-sectional studies***

| Section/Topic                | Item # | Recommendation                                                                                                                                                                       | Reported on page # |
|------------------------------|--------|--------------------------------------------------------------------------------------------------------------------------------------------------------------------------------------|--------------------|
| <b>Title and abstract</b>    | 1      | (a) Indicate the study's design with a commonly used term in the title or the abstract                                                                                               | 3                  |
|                              |        | (b) Provide in the abstract an informative and balanced summary of what was done and what was found                                                                                  | 3                  |
| <b>Introduction</b>          |        |                                                                                                                                                                                      |                    |
| Background/rationale         | 2      | Explain the scientific background and rationale for the investigation being reported                                                                                                 | 5-6                |
| Objectives                   | 3      | State specific objectives, including any prespecified hypotheses                                                                                                                     | 6                  |
| <b>Methods</b>               |        |                                                                                                                                                                                      |                    |
| Study design                 | 4      | Present key elements of study design early in the paper                                                                                                                              | 6                  |
| Setting                      | 5      | Describe the setting, locations, and relevant dates, including periods of recruitment, exposure, follow-up, and data collection                                                      | 6-7                |
| Participants                 | 6      | (a) Give the eligibility criteria, and the sources and methods of selection of participants                                                                                          | 6-7                |
| Variables                    | 7      | Clearly define all outcomes, exposures, predictors, potential confounders, and effect modifiers. Give diagnostic criteria, if applicable                                             | 8-9                |
| Data sources/<br>measurement | 8*     | For each variable of interest, give sources of data and details of methods of assessment (measurement). Describe comparability of assessment methods if there is more than one group | 8-9                |
| Bias                         | 9      | Describe any efforts to address potential sources of bias                                                                                                                            | 7                  |
| Study size                   | 10     | Explain how the study size was arrived at                                                                                                                                            | N/A                |
| Quantitative variables       | 11     | Explain how quantitative variables were handled in the analyses. If applicable, describe which groupings were chosen and why                                                         | 8-9                |
| Statistical methods          | 12     | (a) Describe all statistical methods, including those used to control for confounding                                                                                                | 9                  |
|                              |        | (b) Describe any methods used to examine subgroups and interactions                                                                                                                  | 9                  |
|                              |        | (c) Explain how missing data were addressed                                                                                                                                          | 9                  |
|                              |        | (d) If applicable, describe analytical methods taking account of sampling strategy                                                                                                   | N/A                |
|                              |        | (e) Describe any sensitivity analyses                                                                                                                                                | N/A                |
| <b>Results</b>               |        |                                                                                                                                                                                      |                    |

|                          |     |                                                                                                                                                                                                              |                  |
|--------------------------|-----|--------------------------------------------------------------------------------------------------------------------------------------------------------------------------------------------------------------|------------------|
| Participants             | 13* | (a) Report numbers of individuals at each stage of study—eg numbers potentially eligible, examined for eligibility, confirmed eligible, included in the study, completing follow-up, and analysed            | 9-10             |
|                          |     | (b) Give reasons for non-participation at each stage                                                                                                                                                         | N/A              |
|                          |     | (c) Consider use of a flow diagram                                                                                                                                                                           | N/A              |
| Descriptive data         | 14* | (a) Give characteristics of study participants (eg demographic, clinical, social) and information on exposures and potential confounders                                                                     | 9-10             |
|                          |     | (b) Indicate number of participants with missing data for each variable of interest                                                                                                                          | Table 1-3        |
| Outcome data             | 15* | Report numbers of outcome events or summary measures                                                                                                                                                         | 10-13            |
| Main results             | 16  | (a) Give unadjusted estimates and, if applicable, confounder-adjusted estimates and their precision (eg, 95% confidence interval). Make clear which confounders were adjusted for and why they were included | 10-13            |
|                          |     | (b) Report category boundaries when continuous variables were categorized                                                                                                                                    | N/A              |
|                          |     | (c) If relevant, consider translating estimates of relative risk into absolute risk for a meaningful time period                                                                                             | N/A              |
| Other analyses           | 17  | Report other analyses done—eg analyses of subgroups and interactions, and sensitivity analyses                                                                                                               | 10-13            |
| <b>Discussion</b>        |     |                                                                                                                                                                                                              |                  |
| Key results              | 18  | Summarise key results with reference to study objectives                                                                                                                                                     | 14               |
| Limitations              | 19  | Discuss limitations of the study, taking into account sources of potential bias or imprecision. Discuss both direction and magnitude of any potential bias                                                   | 16               |
| Interpretation           | 20  | Give a cautious overall interpretation of results considering objectives, limitations, multiplicity of analyses, results from similar studies, and other relevant evidence                                   | 15-17            |
| Generalisability         | 21  | Discuss the generalisability (external validity) of the study results                                                                                                                                        | 16               |
| <b>Other information</b> |     |                                                                                                                                                                                                              |                  |
| Funding                  | 22  | Give the source of funding and the role of the funders for the present study and, if applicable, for the original study on which the present article is based                                                | N/A – No funding |

\*Give information separately for cases and controls in case-control studies and, if applicable, for exposed and unexposed groups in cohort and cross-sectional studies.

**Note:** An Explanation and Elaboration article discusses each checklist item and gives methodological background and published examples of transparent reporting. The STROBE checklist is best used in conjunction with this article (freely available on the Web sites of PLoS Medicine at <http://www.plosmedicine.org/>, Annals of Internal Medicine at <http://www.annals.org/>, and Epidemiology at <http://www.epidem.com/>). Information on the STROBE Initiative is available at [www.strobe-statement.org](http://www.strobe-statement.org).
