# Supplementary material for: Understanding patient preference for physician attire: a cross-sectional observational study of 10 academic medical centres in the USA
Source: PubMed Central journal article supplement — BMJ Open. 2018 May 29;8(5):e021239. doi: 10.1136/bmjopen-2017-021239 (PMC5988098; doi:10.1136/bmjopen-2017-021239), 2018-05-29
Supplement: bmjopen-2017-021239supp001.pdf [file bmjopen-2017-021239supp001.pdf]

## Understanding the Role of Physician Clothing on Patient Opinion

---

Thank you for taking the time to complete this survey. Your answers will help us better understand whether physician dress influences patients' opinions of their doctor.

Your responses are very important to us. There are no right or wrong answers and we are interested only in your honest opinions. This survey is brief and should take no more than 5 minutes to complete.

**In Section A please provide a rating by circling the number on the scale that corresponds to your answer.**

**In Sections B, C, and D, please provide your one best answer to each question.**

All of your answers will be kept confidential. We will not use names in any notes, reports, or summaries. Your responses will also not be shared with any of your doctors or care providers.

**Section A – Physician Attire - Ratings**

*Please rate the doctor for each of the following questions by circling the number that corresponds to your answer.*

|                                                                                    |                                                                  |                                                       |
|------------------------------------------------------------------------------------|------------------------------------------------------------------|-------------------------------------------------------|
| 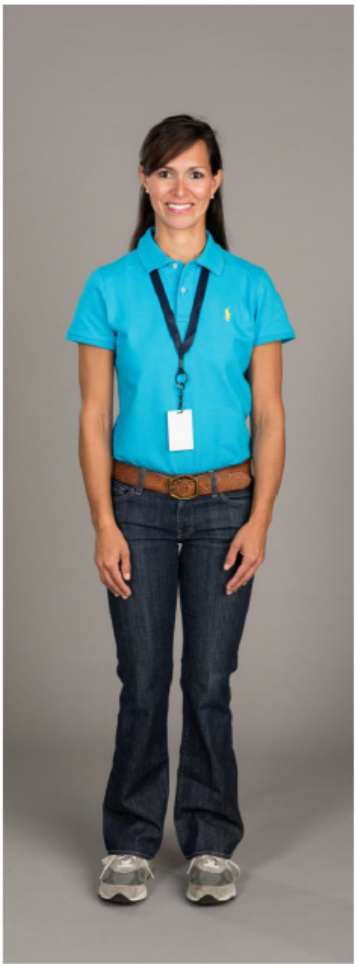 | <p>1) How <b>knowledgeable</b> does this doctor appear?</p>      | <p>1 2 3 4 5 6 7 8 9 10</p> <p>Somewhat Extremely</p> |
|                                                                                    | <p>2) How <b>trustworthy</b> does this doctor appear?</p>        | <p>1 2 3 4 5 6 7 8 9 10</p> <p>Somewhat Extremely</p> |
|                                                                                    | <p>3) How <b>caring</b> does this doctor appear?</p>             | <p>1 2 3 4 5 6 7 8 9 10</p> <p>Somewhat Extremely</p> |
|                                                                                    | <p>4) How <b>approachable</b> does this doctor appear?</p>       | <p>1 2 3 4 5 6 7 8 9 10</p> <p>Somewhat Extremely</p> |
|                                                                                    | <p>5) How <b>comfortable</b> does this doctor make you feel?</p> | <p>1 2 3 4 5 6 7 8 9 10</p> <p>Somewhat Extremely</p> |

**Section B – Physician Attire - Preferences**

*Please provide your ONE best answer to each of the following questions*

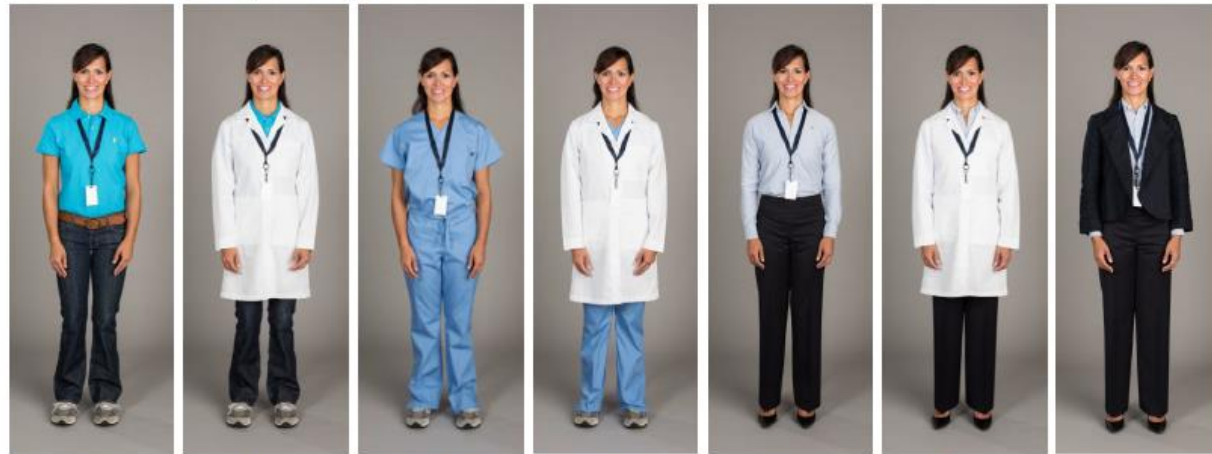

**A                      B                      C                      D                      E                      F                      G**

6) Which doctor would you prefer for your **primary care doctor**? (Please select only ONE option)

                                                                                                                                  

**A                      B                      C                      D                      E                      F                      G**

7) Which doctor would you prefer to see when visiting the **emergency room**? (Please select only ONE option)

                                                                                                                                  

**A                      B                      C                      D                      E                      F                      G**

8) Which doctor would you prefer to see when **in the hospital**? (Please select only ONE option)

                                                                                                                                  

**A                      B                      C                      D                      E                      F                      G**

9) Which doctor would you prefer for your **surgeon**? (Please select only ONE option)

                                                                                                                                  

**A                      B                      C                      D                      E                      F                      G**

10) **Overall**, which clothes do you feel doctors should wear? (Please select only ONE option)

                                                                                                                                  

**A                      B                      C                      D                      E                      F                      G**

**Section C – General Physician Attire**

*Please indicate your level of agreement with the following statements by checking ONE box to the left of your answer.*

---

11) How my doctor dresses is important to me.

Strongly Disagree       Disagree       Neither Agree nor Disagree       Agree       Strongly Agree

---

12) How my doctor dresses influences how happy I am with the care I receive.

Strongly Disagree       Disagree       Neither Agree nor Disagree       Agree       Strongly Agree

---

13) It is appropriate for a doctor to dress casually when seeing patients **over the weekend**.

Strongly Disagree       Disagree       Neither Agree nor Disagree       Agree       Strongly Agree

---

14) Doctors should wear a white coat when seeing patients **in their office or clinic**.

Strongly Disagree       Disagree       Neither Agree nor Disagree       Agree       Strongly Agree

---

15) Doctors should wear a white coat when seeing patients in the **emergency room**.

Strongly Disagree       Disagree       Neither Agree nor Disagree       Agree       Strongly Agree

---

16) Doctors should wear a white coat when seeing patients **in the hospital**.

Strongly Disagree       Disagree       Neither Agree nor Disagree       Agree       Strongly Agree

---

17) Doctors should always wear a white coat when seeing patients **in any setting**.

Strongly Disagree       Disagree       Neither Agree nor Disagree       Agree       Strongly Agree

**Section D – Demographics**

*Please remember that all of your answers will be kept confidential.*

---

18) How old are you?

- 18-25                       26-34                       35-54                       55-64                       65 or older

---

19) What is your gender?

- Male                       Female

---

20) What is the highest level of education you have completed?

- Less than High School       High School               Some College               College               Graduate Degree

---

21) What is your race?

- American Indian/Alaska Native       Asian                       Native Hawaiian or Other Pacific Islander  
 Black or African American               White                       Hispanic  
 Other (Please specify) \_\_\_\_\_

---

22) How many different doctors have you seen in the past year?

- 0                       1                       2                       3                       4                       5                       6 or more
- 

**Thank you for taking the time to fill out our survey.  
Your input is greatly appreciated.**
